# Supplementary material for: Optical phonons in methylammonium lead halide perovskites and implications for charge transport
Source: Royal Society of Chemistry journal article supplement (doi:10.1039/c6mh00275g), 2016-01-01
Supplement: c6mh00275g1.pdf [file c6mh00275g1.pdf]

wavenumber Re(epsilon) Im(epsilon)  
[cm-1]

|          |          |         |
|----------|----------|---------|
| 10       | 33.19762 | 1.36291 |
| 10.16857 | 33.22728 | 1.38878 |
| 10.33714 | 33.2575  | 1.41482 |
| 10.50571 | 33.28831 | 1.44101 |
| 10.67429 | 33.3197  | 1.46737 |
| 10.84286 | 33.35167 | 1.4939  |
| 11.01143 | 33.38424 | 1.5206  |
| 11.18    | 33.4174  | 1.54747 |
| 11.34857 | 33.45116 | 1.57453 |
| 11.51714 | 33.48553 | 1.60178 |
| 11.68571 | 33.52051 | 1.62921 |
| 11.85429 | 33.5561  | 1.65684 |
| 12.02286 | 33.59232 | 1.68466 |
| 12.19143 | 33.62916 | 1.71269 |
| 12.36    | 33.66663 | 1.74093 |
| 12.52857 | 33.70474 | 1.76937 |
| 12.69714 | 33.7435  | 1.79804 |
| 12.86571 | 33.7829  | 1.82692 |
| 13.03429 | 33.82296 | 1.85603 |
| 13.20286 | 33.86368 | 1.88538 |
| 13.37143 | 33.90506 | 1.91496 |
| 13.54    | 33.94712 | 1.94478 |
| 13.70857 | 33.98986 | 1.97485 |
| 13.87714 | 34.03328 | 2.00517 |
| 14.04571 | 34.0774  | 2.03574 |
| 14.21429 | 34.12222 | 2.06659 |
| 14.38286 | 34.16774 | 2.0977  |
| 14.55143 | 34.21399 | 2.12909 |
| 14.72    | 34.26094 | 2.16076 |
| 14.88857 | 34.30864 | 2.19272 |
| 15.05714 | 34.35707 | 2.22497 |
| 15.22571 | 34.40624 | 2.25753 |
| 15.39429 | 34.45617 | 2.29039 |
| 15.56286 | 34.50686 | 2.32357 |
| 15.73143 | 34.55832 | 2.35707 |
| 15.9     | 34.61055 | 2.3909  |
| 16.06857 | 34.66358 | 2.42506 |
| 16.23714 | 34.7174  | 2.45957 |
| 16.40571 | 34.77203 | 2.49443 |
| 16.57429 | 34.82747 | 2.52966 |
| 16.74286 | 34.88373 | 2.56525 |
| 16.91143 | 34.94083 | 2.60121 |
| 17.08    | 34.99878 | 2.63756 |
| 17.24857 | 35.05758 | 2.67431 |
| 17.41714 | 35.11724 | 2.71146 |
| 17.58571 | 35.17779 | 2.74902 |
| 17.75429 | 35.23922 | 2.787   |
| 17.92286 | 35.30154 | 2.82541 |
| 18.09143 | 35.36478 | 2.86427 |
| 18.26    | 35.42894 | 2.90358 |

|          |          |         |
|----------|----------|---------|
| 18.42857 | 35.49403 | 2.94335 |
| 18.59714 | 35.56007 | 2.98359 |
| 18.76571 | 35.62706 | 3.02432 |
| 18.93429 | 35.69503 | 3.06555 |
| 19.10286 | 35.76398 | 3.10728 |
| 19.27143 | 35.83393 | 3.14954 |
| 19.44    | 35.90489 | 3.19233 |
| 19.60857 | 35.97688 | 3.23566 |
| 19.77714 | 36.0499  | 3.27956 |
| 19.94571 | 36.12398 | 3.32402 |
| 20.11429 | 36.19913 | 3.36908 |
| 20.28286 | 36.27536 | 3.41474 |
| 20.45143 | 36.35269 | 3.46101 |
| 20.62    | 36.43114 | 3.50792 |
| 20.78857 | 36.51072 | 3.55548 |
| 20.95714 | 36.59145 | 3.6037  |
| 21.12571 | 36.67335 | 3.65261 |
| 21.29428 | 36.75642 | 3.70221 |
| 21.46286 | 36.84071 | 3.75253 |
| 21.63143 | 36.92621 | 3.80359 |
| 21.8     | 37.01295 | 3.85541 |
| 21.96857 | 37.10095 | 3.908   |
| 22.13714 | 37.19023 | 3.96139 |
| 22.30571 | 37.2808  | 4.0156  |
| 22.47429 | 37.3727  | 4.07065 |
| 22.64286 | 37.46593 | 4.12656 |
| 22.81143 | 37.56053 | 4.18335 |
| 22.98    | 37.65651 | 4.24106 |
| 23.14857 | 37.75389 | 4.2997  |
| 23.31714 | 37.8527  | 4.35931 |
| 23.48571 | 37.95296 | 4.4199  |
| 23.65429 | 38.0547  | 4.48151 |
| 23.82286 | 38.15794 | 4.54417 |
| 23.99143 | 38.26271 | 4.6079  |
| 24.16    | 38.36902 | 4.67275 |
| 24.32857 | 38.47693 | 4.73873 |
| 24.49714 | 38.58643 | 4.80588 |
| 24.66571 | 38.69756 | 4.87424 |
| 24.83429 | 38.81036 | 4.94384 |
| 25.00286 | 38.92484 | 5.01473 |
| 25.17143 | 39.04105 | 5.08693 |
| 25.34    | 39.15901 | 5.1605  |
| 25.50857 | 39.27874 | 5.23546 |
| 25.67714 | 39.40029 | 5.31187 |
| 25.84571 | 39.52369 | 5.38977 |
| 26.01429 | 39.64896 | 5.46921 |
| 26.18286 | 39.77614 | 5.55023 |
| 26.35143 | 39.90526 | 5.63289 |
| 26.52    | 40.03638 | 5.71725 |
| 26.68857 | 40.1695  | 5.80334 |
| 26.85714 | 40.30468 | 5.89124 |
| 27.02571 | 40.44195 | 5.981   |
| 27.19429 | 40.58135 | 6.07268 |

|          |          |          |
|----------|----------|----------|
| 27.36286 | 40.72292 | 6.16634  |
| 27.53143 | 40.86669 | 6.26207  |
| 27.7     | 41.01271 | 6.35992  |
| 27.86857 | 41.16103 | 6.45996  |
| 28.03714 | 41.31166 | 6.56229  |
| 28.20572 | 41.46468 | 6.66696  |
| 28.37429 | 41.62011 | 6.77408  |
| 28.54286 | 41.778   | 6.88372  |
| 28.71143 | 41.93841 | 6.99598  |
| 28.88    | 42.10136 | 7.11095  |
| 29.04857 | 42.2669  | 7.22873  |
| 29.21714 | 42.43509 | 7.34943  |
| 29.38571 | 42.60597 | 7.47315  |
| 29.55429 | 42.77959 | 7.6      |
| 29.72286 | 42.95599 | 7.73011  |
| 29.89143 | 43.13523 | 7.8636   |
| 30.06    | 43.31735 | 8.00059  |
| 30.22857 | 43.50241 | 8.14124  |
| 30.39714 | 43.69043 | 8.28567  |
| 30.56571 | 43.88148 | 8.43404  |
| 30.73429 | 44.07562 | 8.58651  |
| 30.90286 | 44.27288 | 8.74324  |
| 31.07143 | 44.4733  | 8.9044   |
| 31.24    | 44.67695 | 9.07018  |
| 31.40857 | 44.88386 | 9.24076  |
| 31.57714 | 45.09407 | 9.41634  |
| 31.74571 | 45.30764 | 9.59714  |
| 31.91429 | 45.5246  | 9.78337  |
| 32.08286 | 45.74499 | 9.97527  |
| 32.25143 | 45.96884 | 10.17306 |
| 32.42    | 46.19619 | 10.37703 |
| 32.58857 | 46.42706 | 10.58742 |
| 32.75714 | 46.6615  | 10.80453 |
| 32.92571 | 46.89949 | 11.02865 |
| 33.09428 | 47.14108 | 11.26008 |
| 33.26286 | 47.38625 | 11.49916 |
| 33.43143 | 47.63503 | 11.74623 |
| 33.6     | 47.88739 | 12.00166 |
| 33.76857 | 48.14331 | 12.26582 |
| 33.93714 | 48.40278 | 12.53911 |
| 34.10571 | 48.66577 | 12.82196 |
| 34.27428 | 48.93219 | 13.11481 |
| 34.44286 | 49.202   | 13.41811 |
| 34.61143 | 49.4751  | 13.73237 |
| 34.78    | 49.75141 | 14.05809 |
| 34.94857 | 50.03077 | 14.3958  |
| 35.11714 | 50.31307 | 14.74609 |
| 35.28571 | 50.59811 | 15.10953 |
| 35.45428 | 50.88568 | 15.48675 |
| 35.62286 | 51.17556 | 15.8784  |
| 35.79143 | 51.46749 | 16.28516 |
| 35.96    | 51.76112 | 16.70773 |
| 36.12857 | 52.0561  | 17.14687 |

|          |          |          |
|----------|----------|----------|
| 36.29714 | 52.35204 | 17.60333 |
| 36.46571 | 52.64845 | 18.07793 |
| 36.63428 | 52.94482 | 18.57151 |
| 36.80286 | 53.24055 | 19.08492 |
| 36.97143 | 53.53497 | 19.61905 |
| 37.14    | 53.82732 | 20.17483 |
| 37.30857 | 54.11678 | 20.7532  |
| 37.47714 | 54.40239 | 21.35511 |
| 37.64571 | 54.68311 | 21.98157 |
| 37.81429 | 54.95775 | 22.63353 |
| 37.98286 | 55.22505 | 23.31202 |
| 38.15143 | 55.48354 | 24.018   |
| 38.32    | 55.73165 | 24.75246 |
| 38.48857 | 55.96761 | 25.51634 |
| 38.65714 | 56.18951 | 26.31053 |
| 38.82571 | 56.39525 | 27.1359  |
| 38.99429 | 56.58249 | 27.99319 |
| 39.16286 | 56.74874 | 28.88307 |
| 39.33143 | 56.89126 | 29.80606 |
| 39.5     | 57.00711 | 30.76256 |
| 39.66857 | 57.09309 | 31.75271 |
| 39.83714 | 57.14583 | 32.77648 |
| 40.00571 | 57.16167 | 33.83355 |
| 40.17429 | 57.13679 | 34.92327 |
| 40.34286 | 57.06713 | 36.04462 |
| 40.51143 | 56.94853 | 37.1962  |
| 40.68    | 56.77658 | 38.37607 |
| 40.84857 | 56.54688 | 39.58184 |
| 41.01714 | 56.25493 | 40.8105  |
| 41.18571 | 55.89626 | 42.05842 |
| 41.35429 | 55.46654 | 43.32131 |
| 41.52286 | 54.96162 | 44.59418 |
| 41.69143 | 54.37768 | 45.87133 |
| 41.86    | 53.7113  | 47.14631 |
| 42.02857 | 52.95967 | 48.41199 |
| 42.19714 | 52.12066 | 49.66056 |
| 42.36572 | 51.19295 | 50.8836  |
| 42.53429 | 50.17624 | 52.07221 |
| 42.70286 | 49.07128 | 53.21711 |
| 42.87143 | 47.88006 | 54.30878 |
| 43.04    | 46.60583 | 55.3377  |
| 43.20857 | 45.25319 | 56.29448 |
| 43.37714 | 43.82804 | 57.17017 |
| 43.54572 | 42.33764 | 57.95644 |
| 43.71429 | 40.79041 | 58.64579 |
| 43.88286 | 39.1959  | 59.23183 |
| 44.05143 | 37.56454 | 59.70942 |
| 44.22    | 35.90749 | 60.07484 |
| 44.38857 | 34.23633 | 60.32589 |
| 44.55714 | 32.56285 | 60.46198 |
| 44.72572 | 30.89875 | 60.48409 |
| 44.89429 | 29.25539 | 60.39475 |
| 45.06286 | 27.64355 | 60.19792 |

|          |          |          |
|----------|----------|----------|
| 45.23143 | 26.0732  | 59.89888 |
| 45.4     | 24.55334 | 59.50401 |
| 45.56857 | 23.09183 | 59.02062 |
| 45.73714 | 21.69535 | 58.45671 |
| 45.90572 | 20.36933 | 57.8208  |
| 46.07429 | 19.11794 | 57.12162 |
| 46.24286 | 17.94414 | 56.36801 |
| 46.41143 | 16.84975 | 55.5687  |
| 46.58    | 15.83553 | 54.73215 |
| 46.74857 | 14.90125 | 53.86648 |
| 46.91714 | 14.04592 | 52.9793  |
| 47.08571 | 13.26774 | 52.07763 |
| 47.25428 | 12.56439 | 51.16798 |
| 47.42286 | 11.93306 | 50.25618 |
| 47.59143 | 11.37057 | 49.34747 |
| 47.76    | 10.87348 | 48.44642 |
| 47.92857 | 10.43816 | 47.55706 |
| 48.09714 | 10.0609  | 46.68283 |
| 48.26571 | 9.73794  | 45.82666 |
| 48.43428 | 9.46555  | 44.99094 |
| 48.60286 | 9.24005  | 44.17769 |
| 48.77143 | 9.05789  | 43.38847 |
| 48.94    | 8.91563  | 42.6245  |
| 49.10857 | 8.80996  | 41.8867  |
| 49.27714 | 8.73777  | 41.17569 |
| 49.44571 | 8.69609  | 40.49187 |
| 49.61428 | 8.68214  | 39.83542 |
| 49.78286 | 8.69331  | 39.20634 |
| 49.95143 | 8.72717  | 38.60448 |
| 50.12    | 8.78144  | 38.02959 |
| 50.28857 | 8.85402  | 37.48129 |
| 50.45714 | 8.94296  | 36.95913 |
| 50.62571 | 9.04647  | 36.46258 |
| 50.79428 | 9.16289  | 35.99109 |
| 50.96286 | 9.29068  | 35.54403 |
| 51.13143 | 9.42847  | 35.12077 |
| 51.3     | 9.57494  | 34.72065 |
| 51.46857 | 9.72892  | 34.343   |
| 51.63714 | 9.88934  | 33.98716 |
| 51.80571 | 10.05521 | 33.65244 |
| 51.97429 | 10.22561 | 33.33818 |
| 52.14286 | 10.39973 | 33.04372 |
| 52.31143 | 10.57681 | 32.76842 |
| 52.48    | 10.75615 | 32.51164 |
| 52.64857 | 10.93713 | 32.27276 |
| 52.81714 | 11.11917 | 32.05119 |
| 52.98571 | 11.30175 | 31.84634 |
| 53.15429 | 11.48437 | 31.65765 |
| 53.32286 | 11.66661 | 31.48458 |
| 53.49143 | 11.84805 | 31.3266  |
| 53.66    | 12.02833 | 31.18321 |
| 53.82857 | 12.20711 | 31.05392 |
| 53.99714 | 12.38408 | 30.93827 |

|          |          |          |
|----------|----------|----------|
| 54.16571 | 12.55894 | 30.8358  |
| 54.33429 | 12.73144 | 30.7461  |
| 54.50286 | 12.90133 | 30.66873 |
| 54.67143 | 13.06838 | 30.60331 |
| 54.84    | 13.23238 | 30.54946 |
| 55.00857 | 13.39315 | 30.50681 |
| 55.17714 | 13.55049 | 30.47502 |
| 55.34571 | 13.70424 | 30.45374 |
| 55.51429 | 13.85424 | 30.44266 |
| 55.68286 | 14.00034 | 30.44147 |
| 55.85143 | 14.14239 | 30.44987 |
| 56.02    | 14.28026 | 30.46756 |
| 56.18857 | 14.41383 | 30.4943  |
| 56.35714 | 14.54296 | 30.52979 |
| 56.52571 | 14.66755 | 30.57379 |
| 56.69429 | 14.78747 | 30.62606 |
| 56.86286 | 14.90261 | 30.68635 |
| 57.03143 | 15.01288 | 30.75443 |
| 57.2     | 15.11816 | 30.83008 |
| 57.36857 | 15.21834 | 30.91308 |
| 57.53714 | 15.31334 | 31.00323 |
| 57.70572 | 15.40305 | 31.10031 |
| 57.87429 | 15.48738 | 31.20411 |
| 58.04286 | 15.56622 | 31.31446 |
| 58.21143 | 15.63948 | 31.43115 |
| 58.38    | 15.70707 | 31.55399 |
| 58.54857 | 15.76888 | 31.6828  |
| 58.71714 | 15.82483 | 31.81739 |
| 58.88572 | 15.87482 | 31.95757 |
| 59.05429 | 15.91875 | 32.10318 |
| 59.22286 | 15.95653 | 32.25402 |
| 59.39143 | 15.98808 | 32.40992 |
| 59.56    | 16.01327 | 32.5707  |
| 59.72857 | 16.03204 | 32.73618 |
| 59.89714 | 16.04429 | 32.90618 |
| 60.06572 | 16.04991 | 33.08053 |
| 60.23429 | 16.04881 | 33.25903 |
| 60.40286 | 16.0409  | 33.44151 |
| 60.57143 | 16.0261  | 33.62778 |
| 60.74    | 16.00429 | 33.81766 |
| 60.90857 | 15.97542 | 34.01096 |
| 61.07714 | 15.93936 | 34.20749 |
| 61.24572 | 15.89605 | 34.40704 |
| 61.41429 | 15.84538 | 34.60944 |
| 61.58286 | 15.78729 | 34.81446 |
| 61.75143 | 15.72168 | 35.02193 |
| 61.92    | 15.64846 | 35.23162 |
| 62.08857 | 15.56757 | 35.44331 |
| 62.25714 | 15.47893 | 35.65681 |
| 62.42571 | 15.38247 | 35.87189 |
| 62.59428 | 15.27811 | 36.08833 |
| 62.76286 | 15.1658  | 36.30589 |
| 62.93143 | 15.04546 | 36.52435 |

|          |          |          |
|----------|----------|----------|
| 63.1     | 14.91705 | 36.74346 |
| 63.26857 | 14.78052 | 36.963   |
| 63.43714 | 14.63582 | 37.1827  |
| 63.60571 | 14.4829  | 37.40233 |
| 63.77428 | 14.32174 | 37.62164 |
| 63.94286 | 14.15231 | 37.84035 |
| 64.11143 | 13.97459 | 38.05822 |
| 64.28    | 13.78856 | 38.27497 |
| 64.44857 | 13.59422 | 38.49033 |
| 64.61714 | 13.39158 | 38.70404 |
| 64.78571 | 13.18064 | 38.91581 |
| 64.95428 | 12.96142 | 39.12537 |
| 65.12286 | 12.73396 | 39.33244 |
| 65.29143 | 12.4983  | 39.53672 |
| 65.46    | 12.25449 | 39.73796 |
| 65.62857 | 12.00258 | 39.93584 |
| 65.79714 | 11.74264 | 40.13008 |
| 65.96571 | 11.47476 | 40.32041 |
| 66.13428 | 11.19903 | 40.50651 |
| 66.30286 | 10.91555 | 40.68811 |
| 66.47143 | 10.62444 | 40.86493 |
| 66.64    | 10.32583 | 41.03669 |
| 66.80857 | 10.01986 | 41.20309 |
| 66.97714 | 9.70667  | 41.36385 |
| 67.14571 | 9.38643  | 41.5187  |
| 67.31429 | 9.05933  | 41.66739 |
| 67.48286 | 8.72553  | 41.80962 |
| 67.65143 | 8.38525  | 41.94516 |
| 67.82    | 8.0387   | 42.07373 |
| 67.98857 | 7.6861   | 42.1951  |
| 68.15714 | 7.32768  | 42.30901 |
| 68.32571 | 6.96368  | 42.41526 |
| 68.49429 | 6.59437  | 42.5136  |
| 68.66286 | 6.22002  | 42.60384 |
| 68.83143 | 5.84089  | 42.68576 |
| 69       | 5.45728  | 42.75917 |
| 69.16857 | 5.06948  | 42.82391 |
| 69.33714 | 4.6778   | 42.8798  |
| 69.50571 | 4.28254  | 42.92669 |
| 69.67429 | 3.88404  | 42.96443 |
| 69.84286 | 3.4826   | 42.99289 |
| 70.01143 | 3.07858  | 43.01198 |
| 70.18    | 2.6723   | 43.02157 |
| 70.34857 | 2.2641   | 43.02161 |
| 70.51714 | 1.85433  | 43.01201 |
| 70.68571 | 1.44334  | 42.99272 |
| 70.85429 | 1.03148  | 42.9637  |
| 71.02286 | 0.6191   | 42.92493 |
| 71.19143 | 0.20656  | 42.8764  |
| 71.36    | -0.20581 | 42.81812 |
| 71.52857 | -0.61764 | 42.75012 |
| 71.69714 | -1.0286  | 42.67244 |
| 71.86572 | -1.43833 | 42.58512 |

|          |           |          |
|----------|-----------|----------|
| 72.03429 | -1.8465   | 42.48825 |
| 72.20286 | -2.25277  | 42.38191 |
| 72.37143 | -2.65682  | 42.2662  |
| 72.54    | -3.05831  | 42.14122 |
| 72.70857 | -3.45694  | 42.00711 |
| 72.87714 | -3.85239  | 41.86401 |
| 73.04572 | -4.24437  | 41.71207 |
| 73.21429 | -4.63258  | 41.55145 |
| 73.38286 | -5.01675  | 41.38233 |
| 73.55143 | -5.39659  | 41.20492 |
| 73.72    | -5.77185  | 41.01937 |
| 73.88857 | -6.14229  | 40.82593 |
| 74.05714 | -6.50765  | 40.62479 |
| 74.22572 | -6.86772  | 40.4162  |
| 74.39429 | -7.22228  | 40.20037 |
| 74.56286 | -7.57113  | 39.97754 |
| 74.73143 | -7.91407  | 39.74796 |
| 74.9     | -8.25094  | 39.51188 |
| 75.06857 | -8.58156  | 39.26955 |
| 75.23714 | -8.90579  | 39.02123 |
| 75.40572 | -9.22349  | 38.76718 |
| 75.57429 | -9.53452  | 38.50767 |
| 75.74286 | -9.83878  | 38.24295 |
| 75.91143 | -10.13616 | 37.97329 |
| 76.08    | -10.42658 | 37.69896 |
| 76.24857 | -10.70995 | 37.42023 |
| 76.41714 | -10.98623 | 37.13736 |
| 76.58572 | -11.25533 | 36.85061 |
| 76.75429 | -11.51724 | 36.56025 |
| 76.92286 | -11.77191 | 36.26653 |
| 77.09143 | -12.01933 | 35.96972 |
| 77.26    | -12.25948 | 35.67006 |
| 77.42857 | -12.49237 | 35.36781 |
| 77.59715 | -12.718   | 35.06319 |
| 77.76572 | -12.93639 | 34.75647 |
| 77.93429 | -13.14758 | 34.44787 |
| 78.10286 | -13.35159 | 34.13763 |
| 78.27143 | -13.54847 | 33.82597 |
| 78.44    | -13.73827 | 33.51309 |
| 78.60857 | -13.92105 | 33.19923 |
| 78.77715 | -14.09688 | 32.8846  |
| 78.94572 | -14.26581 | 32.56937 |
| 79.11429 | -14.42794 | 32.25377 |
| 79.28286 | -14.58334 | 31.93796 |
| 79.45143 | -14.73209 | 31.62214 |
| 79.62    | -14.8743  | 31.30647 |
| 79.78857 | -15.01006 | 30.99113 |
| 79.95715 | -15.13946 | 30.67628 |
| 80.12572 | -15.26261 | 30.36208 |
| 80.29429 | -15.37962 | 30.04867 |
| 80.46286 | -15.49059 | 29.73619 |
| 80.63143 | -15.59563 | 29.42479 |
| 80.8     | -15.69487 | 29.11458 |



|          |           |          |
|----------|-----------|----------|
| 80.96857 | -15.7884  | 28.8057  |
| 81.13715 | -15.87636 | 28.49826 |
| 81.30572 | -15.95885 | 28.19238 |
| 81.47429 | -16.03601 | 27.88814 |
| 81.64286 | -16.10793 | 27.58566 |
| 81.81143 | -16.17476 | 27.28503 |
| 81.98    | -16.2366  | 26.98633 |
| 82.14857 | -16.29357 | 26.68966 |
| 82.31715 | -16.3458  | 26.39508 |
| 82.48572 | -16.39341 | 26.10266 |
| 82.65429 | -16.43651 | 25.81248 |
| 82.82286 | -16.47522 | 25.52459 |
| 82.99143 | -16.50967 | 25.23907 |
| 83.16    | -16.53997 | 24.95594 |
| 83.32858 | -16.56622 | 24.67526 |
| 83.49715 | -16.58855 | 24.39708 |
| 83.66572 | -16.60707 | 24.12144 |
| 83.83428 | -16.62189 | 23.84838 |
| 84.00285 | -16.63313 | 23.57793 |
| 84.17142 | -16.64088 | 23.3101  |
| 84.34    | -16.64526 | 23.04494 |
| 84.50857 | -16.64637 | 22.78245 |
| 84.67714 | -16.64432 | 22.52267 |
| 84.84571 | -16.6392  | 22.26561 |
| 85.01428 | -16.63112 | 22.01128 |
| 85.18285 | -16.62017 | 21.75968 |
| 85.35143 | -16.60645 | 21.51084 |
| 85.52    | -16.59005 | 21.26475 |
| 85.68857 | -16.57106 | 21.02142 |
| 85.85714 | -16.54959 | 20.78084 |
| 86.02571 | -16.5257  | 20.54302 |
| 86.19428 | -16.49949 | 20.30796 |
| 86.36285 | -16.47105 | 20.07564 |
| 86.53143 | -16.44044 | 19.84607 |
| 86.7     | -16.40777 | 19.61923 |
| 86.86857 | -16.37309 | 19.39511 |
| 87.03714 | -16.33649 | 19.1737  |
| 87.20571 | -16.29805 | 18.95498 |
| 87.37428 | -16.25782 | 18.73896 |
| 87.54285 | -16.21589 | 18.52559 |
| 87.71143 | -16.17233 | 18.31489 |
| 87.88    | -16.1272  | 18.10682 |
| 88.04857 | -16.08056 | 17.90136 |
| 88.21714 | -16.03248 | 17.6985  |
| 88.38571 | -15.98302 | 17.49821 |
| 88.55428 | -15.93223 | 17.30048 |
| 88.72285 | -15.88018 | 17.10529 |
| 88.89143 | -15.82692 | 16.9126  |
| 89.06    | -15.77251 | 16.7224  |
| 89.22857 | -15.717   | 16.53467 |
| 89.39714 | -15.66044 | 16.34938 |
| 89.56571 | -15.60288 | 16.16651 |
| 89.73428 | -15.54437 | 15.98603 |

|          |           |          |
|----------|-----------|----------|
| 89.90285 | -15.48495 | 15.80791 |
| 90.07143 | -15.42468 | 15.63214 |
| 90.24    | -15.36359 | 15.45869 |
| 90.40857 | -15.30173 | 15.28752 |
| 90.57714 | -15.23913 | 15.11862 |
| 90.74571 | -15.17585 | 14.95195 |
| 90.91428 | -15.11191 | 14.7875  |
| 91.08286 | -15.04735 | 14.62524 |
| 91.25143 | -14.98222 | 14.46514 |
| 91.42    | -14.91654 | 14.30716 |
| 91.58857 | -14.85034 | 14.1513  |
| 91.75714 | -14.78367 | 13.99751 |
| 91.92571 | -14.71656 | 13.84579 |
| 92.09428 | -14.64902 | 13.69608 |
| 92.26286 | -14.5811  | 13.54839 |
| 92.43143 | -14.51282 | 13.40266 |
| 92.6     | -14.4442  | 13.25889 |
| 92.76857 | -14.37529 | 13.11704 |
| 92.93714 | -14.30609 | 12.97709 |
| 93.10571 | -14.23664 | 12.83901 |
| 93.27428 | -14.16695 | 12.70278 |
| 93.44286 | -14.09706 | 12.56837 |
| 93.61143 | -14.02699 | 12.43576 |
| 93.78    | -13.95674 | 12.30492 |
| 93.94857 | -13.88635 | 12.17583 |
| 94.11714 | -13.81584 | 12.04846 |
| 94.28571 | -13.74523 | 11.92279 |
| 94.45428 | -13.67452 | 11.7988  |
| 94.62286 | -13.60375 | 11.67646 |
| 94.79143 | -13.53292 | 11.55575 |
| 94.96    | -13.46206 | 11.43664 |
| 95.12857 | -13.39118 | 11.31911 |
| 95.29714 | -13.32029 | 11.20314 |
| 95.46571 | -13.24941 | 11.08871 |
| 95.63428 | -13.17856 | 10.9758  |
| 95.80286 | -13.10774 | 10.86437 |
| 95.97143 | -13.03697 | 10.75442 |
| 96.14    | -12.96626 | 10.64592 |
| 96.30857 | -12.89563 | 10.53884 |
| 96.47714 | -12.82509 | 10.43318 |
| 96.64571 | -12.75464 | 10.3289  |
| 96.81429 | -12.6843  | 10.22598 |
| 96.98286 | -12.61407 | 10.12441 |
| 97.15143 | -12.54397 | 10.02417 |
| 97.32    | -12.474   | 9.92524  |
| 97.48857 | -12.40418 | 9.82759  |
| 97.65714 | -12.33452 | 9.73121  |
| 97.82571 | -12.26501 | 9.63608  |
| 97.99429 | -12.19567 | 9.54219  |
| 98.16286 | -12.12651 | 9.4495   |
| 98.33143 | -12.05753 | 9.35801  |
| 98.5     | -11.98875 | 9.2677   |
| 98.66857 | -11.92016 | 9.17855  |

|           |           |         |
|-----------|-----------|---------|
| 98.83714  | -11.85177 | 9.09054 |
| 99.00571  | -11.78359 | 9.00366 |
| 99.17429  | -11.71563 | 8.91789 |
| 99.34286  | -11.64788 | 8.8332  |
| 99.51143  | -11.58036 | 8.7496  |
| 99.68     | -11.51307 | 8.66705 |
| 99.84857  | -11.44601 | 8.58555 |
| 100.01714 | -11.37919 | 8.50508 |
| 100.18571 | -11.31261 | 8.42562 |
| 100.35429 | -11.24628 | 8.34716 |
| 100.52286 | -11.1802  | 8.26969 |
| 100.69143 | -11.11437 | 8.19318 |
| 100.86    | -11.0488  | 8.11763 |
| 101.02857 | -10.98349 | 8.04302 |
| 101.19714 | -10.91844 | 7.96933 |
| 101.36572 | -10.85365 | 7.89657 |
| 101.53429 | -10.78913 | 7.82469 |
| 101.70286 | -10.72489 | 7.75371 |
| 101.87143 | -10.66091 | 7.6836  |
| 102.04    | -10.59721 | 7.61435 |
| 102.20857 | -10.53378 | 7.54595 |
| 102.37714 | -10.47064 | 7.47838 |
| 102.54572 | -10.40777 | 7.41164 |
| 102.71429 | -10.34518 | 7.3457  |
| 102.88286 | -10.28287 | 7.28057 |
| 103.05143 | -10.22085 | 7.21622 |
| 103.22    | -10.15912 | 7.15266 |
| 103.38857 | -10.09767 | 7.08985 |
| 103.55714 | -10.03651 | 7.0278  |
| 103.72572 | -9.97563  | 6.96649 |
| 103.89429 | -9.91505  | 6.90591 |
| 104.06286 | -9.85475  | 6.84606 |
| 104.23143 | -9.79474  | 6.78691 |
| 104.4     | -9.73502  | 6.72847 |
| 104.56857 | -9.67559  | 6.67072 |
| 104.73714 | -9.61646  | 6.61364 |
| 104.90572 | -9.55761  | 6.55724 |
| 105.07429 | -9.49905  | 6.5015  |
| 105.24286 | -9.44079  | 6.44641 |
| 105.41143 | -9.38282  | 6.39196 |
| 105.58    | -9.32514  | 6.33815 |
| 105.74857 | -9.26774  | 6.28496 |
| 105.91714 | -9.21064  | 6.23238 |
| 106.08572 | -9.15383  | 6.18041 |
| 106.25429 | -9.09731  | 6.12905 |
| 106.42286 | -9.04108  | 6.07826 |
| 106.59143 | -8.98514  | 6.02806 |
| 106.76    | -8.92948  | 5.97844 |
| 106.92857 | -8.87412  | 5.92937 |
| 107.09715 | -8.81904  | 5.88087 |
| 107.26572 | -8.76425  | 5.83291 |
| 107.43429 | -8.70974  | 5.7855  |
| 107.60286 | -8.65553  | 5.73862 |

|           |          |         |
|-----------|----------|---------|
| 107.77143 | -8.60159 | 5.69226 |
| 107.94    | -8.54794 | 5.64642 |
| 108.10857 | -8.49457 | 5.6011  |
| 108.27715 | -8.44149 | 5.55628 |
| 108.44572 | -8.38868 | 5.51196 |
| 108.61429 | -8.33616 | 5.46813 |
| 108.78286 | -8.28392 | 5.42478 |
| 108.95143 | -8.23195 | 5.38191 |
| 109.12    | -8.18027 | 5.33951 |
| 109.28857 | -8.12886 | 5.29758 |
| 109.45715 | -8.07772 | 5.2561  |
| 109.62572 | -8.02686 | 5.21508 |
| 109.79429 | -7.97627 | 5.1745  |
| 109.96286 | -7.92596 | 5.13436 |
| 110.13143 | -7.87592 | 5.09466 |
| 110.3     | -7.82614 | 5.05538 |
| 110.46857 | -7.77664 | 5.01653 |
| 110.63715 | -7.7274  | 4.97809 |
| 110.80572 | -7.67843 | 4.94006 |
| 110.97429 | -7.62972 | 4.90244 |
| 111.14286 | -7.58128 | 4.86522 |
| 111.31143 | -7.5331  | 4.82839 |
| 111.48    | -7.48519 | 4.79195 |
| 111.64857 | -7.43753 | 4.7559  |
| 111.81715 | -7.39013 | 4.72023 |
| 111.98572 | -7.343   | 4.68493 |
| 112.15429 | -7.29611 | 4.64999 |
| 112.32286 | -7.24948 | 4.61543 |
| 112.49143 | -7.20311 | 4.58122 |
| 112.66    | -7.15699 | 4.54737 |
| 112.82858 | -7.11112 | 4.51387 |
| 112.99715 | -7.0655  | 4.48071 |
| 113.16572 | -7.02013 | 4.44789 |
| 113.33428 | -6.97501 | 4.41542 |
| 113.50285 | -6.93013 | 4.38327 |
| 113.67142 | -6.88549 | 4.35145 |
| 113.84    | -6.8411  | 4.31996 |
| 114.00857 | -6.79696 | 4.28878 |
| 114.17714 | -6.75305 | 4.25792 |
| 114.34571 | -6.70938 | 4.22738 |
| 114.51428 | -6.66595 | 4.19714 |
| 114.68285 | -6.62276 | 4.1672  |
| 114.85143 | -6.5798  | 4.13756 |
| 115.02    | -6.53708 | 4.10822 |
| 115.18857 | -6.49459 | 4.07917 |
| 115.35714 | -6.45233 | 4.05042 |
| 115.52571 | -6.4103  | 4.02194 |
| 115.69428 | -6.36849 | 3.99375 |
| 115.86285 | -6.32692 | 3.96583 |
| 116.03143 | -6.28557 | 3.93819 |
| 116.2     | -6.24445 | 3.91082 |
| 116.36857 | -6.20355 | 3.88372 |
| 116.53714 | -6.16287 | 3.85688 |

|           |          |         |
|-----------|----------|---------|
| 116.70571 | -6.12241 | 3.8303  |
| 116.87428 | -6.08217 | 3.80398 |
| 117.04285 | -6.04215 | 3.77792 |
| 117.21143 | -6.00235 | 3.7521  |
| 117.38    | -5.96276 | 3.72654 |
| 117.54857 | -5.92338 | 3.70122 |
| 117.71714 | -5.88422 | 3.67614 |
| 117.88571 | -5.84527 | 3.6513  |
| 118.05428 | -5.80653 | 3.6267  |
| 118.22285 | -5.768   | 3.60234 |
| 118.39143 | -5.72967 | 3.5782  |
| 118.56    | -5.69156 | 3.55429 |
| 118.72857 | -5.65364 | 3.53061 |
| 118.89714 | -5.61593 | 3.50715 |
| 119.06571 | -5.57842 | 3.4839  |
| 119.23428 | -5.54112 | 3.46088 |
| 119.40285 | -5.50401 | 3.43807 |
| 119.57143 | -5.4671  | 3.41547 |
| 119.74    | -5.43039 | 3.39309 |
| 119.90857 | -5.39388 | 3.37091 |
| 120.07714 | -5.35756 | 3.34893 |
| 120.24571 | -5.32143 | 3.32716 |
| 120.41428 | -5.2855  | 3.30558 |
| 120.58286 | -5.24975 | 3.28421 |
| 120.75143 | -5.2142  | 3.26303 |
| 120.92    | -5.17884 | 3.24204 |
| 121.08857 | -5.14366 | 3.22124 |
| 121.25714 | -5.10867 | 3.20064 |
| 121.42571 | -5.07386 | 3.18021 |
| 121.59428 | -5.03924 | 3.15997 |
| 121.76286 | -5.00481 | 3.13992 |
| 121.93143 | -4.97055 | 3.12004 |
| 122.1     | -4.93648 | 3.10035 |
| 122.26857 | -4.90258 | 3.08082 |
| 122.43714 | -4.86886 | 3.06148 |
| 122.60571 | -4.83532 | 3.0423  |
| 122.77428 | -4.80196 | 3.02329 |
| 122.94286 | -4.76876 | 3.00446 |
| 123.11143 | -4.73575 | 2.98578 |
| 123.28    | -4.7029  | 2.96728 |
| 123.44857 | -4.67023 | 2.94893 |
| 123.61714 | -4.63773 | 2.93074 |
| 123.78571 | -4.60539 | 2.91272 |
| 123.95428 | -4.57323 | 2.89485 |
| 124.12286 | -4.54123 | 2.87713 |
| 124.29143 | -4.5094  | 2.85957 |
| 124.46    | -4.47773 | 2.84216 |
| 124.62857 | -4.44623 | 2.82491 |
| 124.79714 | -4.41488 | 2.80779 |
| 124.96571 | -4.3837  | 2.79083 |
| 125.13428 | -4.35268 | 2.77401 |
| 125.30286 | -4.32183 | 2.75734 |
| 125.47143 | -4.29113 | 2.7408  |

|           |          |         |
|-----------|----------|---------|
| 125.64    | -4.26058 | 2.72441 |
| 125.80857 | -4.2302  | 2.70816 |
| 125.97714 | -4.19997 | 2.69204 |
| 126.14571 | -4.16989 | 2.67606 |
| 126.31429 | -4.13997 | 2.66022 |
| 126.48286 | -4.1102  | 2.6445  |
| 126.65143 | -4.08058 | 2.62892 |
| 126.82    | -4.05111 | 2.61347 |
| 126.98857 | -4.02179 | 2.59815 |
| 127.15714 | -3.99262 | 2.58295 |
| 127.32571 | -3.9636  | 2.56789 |
| 127.49429 | -3.93472 | 2.55294 |
| 127.66286 | -3.90599 | 2.53812 |
| 127.83143 | -3.87741 | 2.52342 |
| 128       | -3.84897 | 2.50884 |
| 128.16856 | -3.82067 | 2.49439 |
| 128.33714 | -3.79252 | 2.48004 |
| 128.50571 | -3.7645  | 2.46582 |
| 128.67429 | -3.73663 | 2.45171 |
| 128.84285 | -3.70889 | 2.43772 |
| 129.01143 | -3.68129 | 2.42384 |
| 129.17999 | -3.65384 | 2.41007 |
| 129.34857 | -3.62651 | 2.39642 |
| 129.51714 | -3.59933 | 2.38287 |
| 129.68571 | -3.57228 | 2.36943 |
| 129.85428 | -3.54536 | 2.3561  |
| 130.02286 | -3.51858 | 2.34288 |
| 130.19142 | -3.49192 | 2.32976 |
| 130.36    | -3.4654  | 2.31674 |
| 130.52856 | -3.43901 | 2.30383 |
| 130.69714 | -3.41275 | 2.29102 |
| 130.86571 | -3.38662 | 2.27831 |
| 131.03429 | -3.36062 | 2.26571 |
| 131.20285 | -3.33475 | 2.2532  |
| 131.37143 | -3.309   | 2.24079 |
| 131.53999 | -3.28338 | 2.22847 |
| 131.70857 | -3.25788 | 2.21625 |
| 131.87714 | -3.2325  | 2.20413 |
| 132.04572 | -3.20725 | 2.1921  |
| 132.21428 | -3.18213 | 2.18017 |
| 132.38286 | -3.15712 | 2.16833 |
| 132.55142 | -3.13224 | 2.15657 |
| 132.72    | -3.10747 | 2.14491 |
| 132.88857 | -3.08283 | 2.13334 |
| 133.05714 | -3.0583  | 2.12186 |
| 133.22571 | -3.03389 | 2.11047 |
| 133.39429 | -3.0096  | 2.09916 |
| 133.56285 | -2.98543 | 2.08794 |
| 133.73143 | -2.96137 | 2.0768  |
| 133.89999 | -2.93743 | 2.06575 |
| 134.06857 | -2.9136  | 2.05478 |
| 134.23714 | -2.88988 | 2.04389 |
| 134.40572 | -2.86628 | 2.03309 |

|           |          |         |
|-----------|----------|---------|
| 134.57428 | -2.84279 | 2.02237 |
| 134.74286 | -2.81941 | 2.01173 |
| 134.91142 | -2.79614 | 2.00116 |
| 135.08    | -2.77298 | 1.99068 |
| 135.24857 | -2.74994 | 1.98027 |
| 135.41714 | -2.727   | 1.96995 |
| 135.58571 | -2.70417 | 1.95969 |
| 135.75429 | -2.68144 | 1.94952 |
| 135.92285 | -2.65883 | 1.93942 |
| 136.09143 | -2.63631 | 1.92939 |
| 136.25999 | -2.61391 | 1.91944 |
| 136.42857 | -2.59161 | 1.90956 |
| 136.59714 | -2.56941 | 1.89975 |
| 136.76572 | -2.54732 | 1.89002 |
| 136.93428 | -2.52533 | 1.88035 |
| 137.10286 | -2.50344 | 1.87076 |
| 137.27142 | -2.48165 | 1.86123 |
| 137.44    | -2.45997 | 1.85178 |
| 137.60857 | -2.43838 | 1.84239 |
| 137.77715 | -2.4169  | 1.83307 |
| 137.94571 | -2.39551 | 1.82382 |
| 138.11429 | -2.37422 | 1.81463 |
| 138.28285 | -2.35304 | 1.80551 |
| 138.45143 | -2.33194 | 1.79645 |
| 138.62    | -2.31095 | 1.78746 |
| 138.78857 | -2.29005 | 1.77854 |
| 138.95714 | -2.26924 | 1.76967 |
| 139.12572 | -2.24853 | 1.76087 |
| 139.29428 | -2.22792 | 1.75213 |
| 139.46286 | -2.2074  | 1.74346 |
| 139.63142 | -2.18697 | 1.73484 |
| 139.8     | -2.16664 | 1.72629 |
| 139.96857 | -2.1464  | 1.71779 |
| 140.13715 | -2.12624 | 1.70936 |
| 140.30571 | -2.10618 | 1.70098 |
| 140.47429 | -2.08621 | 1.69266 |
| 140.64285 | -2.06633 | 1.6844  |
| 140.81143 | -2.04654 | 1.6762  |
| 140.98    | -2.02684 | 1.66806 |
| 141.14857 | -2.00723 | 1.65997 |
| 141.31714 | -1.9877  | 1.65193 |
| 141.48572 | -1.96826 | 1.64395 |
| 141.65428 | -1.94891 | 1.63603 |
| 141.82286 | -1.92965 | 1.62816 |
| 141.99142 | -1.91047 | 1.62035 |
| 142.16    | -1.89137 | 1.61258 |
| 142.32857 | -1.87237 | 1.60488 |
| 142.49715 | -1.85344 | 1.59722 |
| 142.66571 | -1.8346  | 1.58961 |
| 142.83429 | -1.81584 | 1.58206 |
| 143.00285 | -1.79716 | 1.57456 |
| 143.17143 | -1.77857 | 1.56711 |
| 143.34    | -1.76006 | 1.55971 |

|           |          |         |
|-----------|----------|---------|
| 143.50858 | -1.74163 | 1.55236 |
| 143.67714 | -1.72328 | 1.54505 |
| 143.84572 | -1.70501 | 1.5378  |
| 144.01428 | -1.68682 | 1.5306  |
| 144.18286 | -1.66871 | 1.52344 |
| 144.35143 | -1.65068 | 1.51633 |
| 144.52    | -1.63272 | 1.50927 |
| 144.68857 | -1.61485 | 1.50225 |
| 144.85715 | -1.59705 | 1.49529 |
| 145.02571 | -1.57933 | 1.48836 |
| 145.19429 | -1.56169 | 1.48149 |
| 145.36285 | -1.54412 | 1.47466 |
| 145.53143 | -1.52663 | 1.46787 |
| 145.7     | -1.50921 | 1.46113 |
| 145.86858 | -1.49187 | 1.45443 |
| 146.03714 | -1.4746  | 1.44778 |
| 146.20572 | -1.45741 | 1.44116 |
| 146.37428 | -1.44029 | 1.4346  |
| 146.54286 | -1.42324 | 1.42807 |
| 146.71143 | -1.40627 | 1.42159 |
| 146.88    | -1.38937 | 1.41515 |
| 147.04857 | -1.37254 | 1.40875 |
| 147.21715 | -1.35578 | 1.40239 |
| 147.38571 | -1.33909 | 1.39607 |
| 147.55429 | -1.32247 | 1.38979 |
| 147.72285 | -1.30593 | 1.38356 |
| 147.89143 | -1.28945 | 1.37736 |
| 148.06    | -1.27305 | 1.3712  |
| 148.22858 | -1.25671 | 1.36508 |
| 148.39714 | -1.24044 | 1.35901 |
| 148.56572 | -1.22424 | 1.35296 |
| 148.73428 | -1.2081  | 1.34696 |
| 148.90286 | -1.19204 | 1.341   |
| 149.07143 | -1.17604 | 1.33507 |
| 149.24001 | -1.16011 | 1.32918 |
| 149.40857 | -1.14424 | 1.32333 |
| 149.57715 | -1.12844 | 1.31751 |
| 149.74571 | -1.11271 | 1.31173 |
| 149.91429 | -1.09704 | 1.30599 |
| 150.08286 | -1.08144 | 1.30028 |
| 150.25143 | -1.0659  | 1.29461 |
| 150.42    | -1.05043 | 1.28897 |
| 150.58858 | -1.03501 | 1.28337 |
| 150.75714 | -1.01967 | 1.27781 |
| 150.92572 | -1.00438 | 1.27227 |
| 151.09428 | -0.98916 | 1.26677 |
| 151.26286 | -0.974   | 1.26131 |
| 151.43143 | -0.95891 | 1.25588 |
| 151.60001 | -0.94387 | 1.25048 |
| 151.76857 | -0.9289  | 1.24512 |
| 151.93715 | -0.91398 | 1.23978 |
| 152.10571 | -0.89913 | 1.23448 |
| 152.27429 | -0.88434 | 1.22922 |



|           |          |         |
|-----------|----------|---------|
| 152.44286 | -0.86961 | 1.22398 |
| 152.61143 | -0.85494 | 1.21878 |
| 152.78    | -0.84032 | 1.21361 |
| 152.94858 | -0.82577 | 1.20847 |
| 153.11714 | -0.81128 | 1.20336 |
| 153.28572 | -0.79684 | 1.19828 |
| 153.45428 | -0.78246 | 1.19323 |
| 153.62286 | -0.76814 | 1.18821 |
| 153.79143 | -0.75388 | 1.18323 |
| 153.96001 | -0.73967 | 1.17827 |
| 154.12857 | -0.72552 | 1.17334 |
| 154.29715 | -0.71143 | 1.16844 |
| 154.46571 | -0.69739 | 1.16357 |
| 154.63429 | -0.68341 | 1.15873 |
| 154.80286 | -0.66949 | 1.15392 |
| 154.97144 | -0.65562 | 1.14913 |
| 155.14    | -0.64181 | 1.14438 |
| 155.30858 | -0.62805 | 1.13965 |
| 155.47714 | -0.61434 | 1.13495 |
| 155.64572 | -0.60069 | 1.13028 |
| 155.81429 | -0.58709 | 1.12564 |
| 155.98286 | -0.57355 | 1.12102 |
| 156.15143 | -0.56006 | 1.11643 |
| 156.32001 | -0.54662 | 1.11186 |
| 156.48857 | -0.53324 | 1.10733 |
| 156.65715 | -0.5199  | 1.10282 |
| 156.82571 | -0.50662 | 1.09833 |
| 156.99429 | -0.4934  | 1.09387 |
| 157.16286 | -0.48022 | 1.08944 |
| 157.33144 | -0.46709 | 1.08503 |
| 157.5     | -0.45402 | 1.08065 |
| 157.66856 | -0.441   | 1.0763  |
| 157.83714 | -0.42802 | 1.07197 |
| 158.00571 | -0.4151  | 1.06766 |
| 158.17429 | -0.40223 | 1.06338 |
| 158.34285 | -0.38941 | 1.05912 |
| 158.51143 | -0.37663 | 1.05489 |
| 158.67999 | -0.36391 | 1.05068 |
| 158.84857 | -0.35123 | 1.04649 |
| 159.01714 | -0.33861 | 1.04233 |
| 159.18571 | -0.32603 | 1.0382  |
| 159.35428 | -0.3135  | 1.03408 |
| 159.52286 | -0.30102 | 1.02999 |
| 159.69142 | -0.28858 | 1.02592 |
| 159.86    | -0.27619 | 1.02188 |
| 160.02856 | -0.26386 | 1.01786 |
| 160.19714 | -0.25156 | 1.01386 |
| 160.36571 | -0.23932 | 1.00988 |
| 160.53429 | -0.22712 | 1.00592 |
| 160.70285 | -0.21496 | 1.00199 |
| 160.87143 | -0.20286 | 0.99808 |
| 161.03999 | -0.1908  | 0.99419 |
| 161.20857 | -0.17878 | 0.99032 |

|           |          |         |
|-----------|----------|---------|
| 161.37714 | -0.16681 | 0.98648 |
| 161.54572 | -0.15488 | 0.98265 |
| 161.71428 | -0.143   | 0.97885 |
| 161.88286 | -0.13116 | 0.97507 |
| 162.05142 | -0.11937 | 0.97131 |
| 162.22    | -0.10763 | 0.96756 |
| 162.38857 | -0.09592 | 0.96384 |
| 162.55714 | -0.08426 | 0.96014 |
| 162.72571 | -0.07264 | 0.95646 |
| 162.89429 | -0.06107 | 0.9528  |
| 163.06285 | -0.04954 | 0.94917 |
| 163.23143 | -0.03805 | 0.94555 |
| 163.39999 | -0.02661 | 0.94195 |
| 163.56857 | -0.0152  | 0.93836 |
| 163.73714 | -0.00384 | 0.9348  |
| 163.90572 | 0.00747  | 0.93126 |
| 164.07428 | 0.01875  | 0.92774 |
| 164.24286 | 0.02999  | 0.92423 |
| 164.41142 | 0.04118  | 0.92075 |
| 164.58    | 0.05233  | 0.91728 |
| 164.74857 | 0.06344  | 0.91384 |
| 164.91714 | 0.07452  | 0.91041 |
| 165.08571 | 0.08555  | 0.907   |
| 165.25429 | 0.09654  | 0.9036  |
| 165.42285 | 0.10749  | 0.90023 |
| 165.59143 | 0.1184   | 0.89687 |
| 165.75999 | 0.12927  | 0.89354 |
| 165.92857 | 0.1401   | 0.89021 |
| 166.09714 | 0.15089  | 0.88691 |
| 166.26572 | 0.16164  | 0.88363 |
| 166.43428 | 0.17236  | 0.88036 |
| 166.60286 | 0.18303  | 0.87711 |
| 166.77142 | 0.19367  | 0.87387 |
| 166.94    | 0.20427  | 0.87065 |
| 167.10857 | 0.21483  | 0.86746 |
| 167.27715 | 0.22535  | 0.86427 |
| 167.44571 | 0.23583  | 0.86111 |
| 167.61429 | 0.24628  | 0.85796 |
| 167.78285 | 0.25669  | 0.85482 |
| 167.95143 | 0.26706  | 0.8517  |
| 168.12    | 0.2774   | 0.8486  |
| 168.28857 | 0.28769  | 0.84552 |
| 168.45714 | 0.29795  | 0.84245 |
| 168.62572 | 0.30818  | 0.8394  |
| 168.79428 | 0.31837  | 0.83636 |
| 168.96286 | 0.32852  | 0.83334 |
| 169.13142 | 0.33864  | 0.83033 |
| 169.3     | 0.34872  | 0.82734 |
| 169.46857 | 0.35876  | 0.82437 |
| 169.63715 | 0.36877  | 0.82141 |
| 169.80571 | 0.37874  | 0.81846 |
| 169.97429 | 0.38868  | 0.81553 |
| 170.14285 | 0.39859  | 0.81262 |

|           |         |         |
|-----------|---------|---------|
| 170.31143 | 0.40846 | 0.80972 |
| 170.48    | 0.41829 | 0.80683 |
| 170.64857 | 0.42809 | 0.80396 |
| 170.81714 | 0.43786 | 0.80111 |
| 170.98572 | 0.44759 | 0.79827 |
| 171.15428 | 0.45728 | 0.79544 |
| 171.32286 | 0.46695 | 0.79263 |
| 171.49142 | 0.47658 | 0.78983 |
| 171.66    | 0.48618 | 0.78704 |
| 171.82857 | 0.49574 | 0.78427 |
| 171.99715 | 0.50527 | 0.78152 |
| 172.16571 | 0.51477 | 0.77878 |
| 172.33429 | 0.52423 | 0.77605 |
| 172.50285 | 0.53366 | 0.77333 |
| 172.67143 | 0.54306 | 0.77063 |
| 172.84    | 0.55243 | 0.76794 |
| 173.00858 | 0.56176 | 0.76527 |
| 173.17714 | 0.57106 | 0.76261 |
| 173.34572 | 0.58033 | 0.75996 |
| 173.51428 | 0.58957 | 0.75732 |
| 173.68286 | 0.59878 | 0.7547  |
| 173.85143 | 0.60795 | 0.75209 |
| 174.02    | 0.6171  | 0.7495  |
| 174.18857 | 0.62621 | 0.74691 |
| 174.35715 | 0.63529 | 0.74434 |
| 174.52571 | 0.64434 | 0.74178 |
| 174.69429 | 0.65336 | 0.73924 |
| 174.86285 | 0.66235 | 0.73671 |
| 175.03143 | 0.67131 | 0.73419 |
| 175.2     | 0.68024 | 0.73168 |
| 175.36858 | 0.68914 | 0.72918 |
| 175.53714 | 0.698   | 0.7267  |
| 175.70572 | 0.70684 | 0.72423 |
| 175.87428 | 0.71565 | 0.72177 |
| 176.04286 | 0.72443 | 0.71932 |
| 176.21143 | 0.73318 | 0.71688 |
| 176.38    | 0.7419  | 0.71446 |
| 176.54857 | 0.75059 | 0.71205 |
| 176.71715 | 0.75925 | 0.70965 |
| 176.88571 | 0.76788 | 0.70726 |
| 177.05429 | 0.77648 | 0.70488 |
| 177.22285 | 0.78506 | 0.70251 |
| 177.39143 | 0.79361 | 0.70016 |
| 177.56    | 0.80212 | 0.69781 |
| 177.72858 | 0.81061 | 0.69548 |
| 177.89714 | 0.81907 | 0.69316 |
| 178.06572 | 0.82751 | 0.69085 |
| 178.23428 | 0.83591 | 0.68855 |
| 178.40286 | 0.84429 | 0.68626 |
| 178.57143 | 0.85264 | 0.68399 |
| 178.74001 | 0.86096 | 0.68172 |
| 178.90857 | 0.86925 | 0.67946 |
| 179.07715 | 0.87752 | 0.67722 |

|           |         |         |
|-----------|---------|---------|
| 179.24571 | 0.88576 | 0.67498 |
| 179.41429 | 0.89398 | 0.67276 |
| 179.58286 | 0.90216 | 0.67055 |
| 179.75143 | 0.91032 | 0.66834 |
| 179.92    | 0.91845 | 0.66615 |
| 180.08858 | 0.92656 | 0.66397 |
| 180.25714 | 0.93464 | 0.66179 |
| 180.42572 | 0.94269 | 0.65963 |
| 180.59428 | 0.95072 | 0.65748 |
| 180.76286 | 0.95872 | 0.65534 |
| 180.93143 | 0.96669 | 0.65321 |
| 181.10001 | 0.97464 | 0.65108 |
| 181.26857 | 0.98256 | 0.64897 |
| 181.43715 | 0.99046 | 0.64687 |
| 181.60571 | 0.99833 | 0.64478 |
| 181.77429 | 1.00618 | 0.64269 |
| 181.94286 | 1.014   | 0.64062 |
| 182.11143 | 1.0218  | 0.63856 |
| 182.28    | 1.02957 | 0.6365  |
| 182.44858 | 1.03731 | 0.63446 |
| 182.61714 | 1.04503 | 0.63242 |
| 182.78572 | 1.05273 | 0.63039 |
| 182.95428 | 1.0604  | 0.62838 |
| 183.12286 | 1.06805 | 0.62637 |
| 183.29143 | 1.07567 | 0.62437 |
| 183.46001 | 1.08327 | 0.62238 |
| 183.62857 | 1.09084 | 0.6204  |
| 183.79715 | 1.09839 | 0.61843 |
| 183.96571 | 1.10591 | 0.61647 |
| 184.13429 | 1.11342 | 0.61452 |
| 184.30286 | 1.12089 | 0.61257 |
| 184.47144 | 1.12835 | 0.61063 |
| 184.64    | 1.13578 | 0.60871 |
| 184.80858 | 1.14319 | 0.60679 |
| 184.97714 | 1.15057 | 0.60488 |
| 185.14572 | 1.15793 | 0.60298 |
| 185.31429 | 1.16527 | 0.60109 |
| 185.48286 | 1.17258 | 0.5992  |
| 185.65143 | 1.17987 | 0.59733 |
| 185.82001 | 1.18714 | 0.59546 |
| 185.98857 | 1.19438 | 0.5936  |
| 186.15715 | 1.2016  | 0.59175 |
| 186.32571 | 1.2088  | 0.58991 |
| 186.49429 | 1.21598 | 0.58807 |
| 186.66286 | 1.22314 | 0.58625 |
| 186.83144 | 1.23027 | 0.58443 |
| 187       | 1.23738 | 0.58262 |
| 187.16856 | 1.24447 | 0.58082 |
| 187.33714 | 1.25153 | 0.57902 |
| 187.50571 | 1.25858 | 0.57724 |
| 187.67429 | 1.2656  | 0.57546 |
| 187.84285 | 1.2726  | 0.57369 |
| 188.01143 | 1.27958 | 0.57193 |

|           |         |         |
|-----------|---------|---------|
| 188.17999 | 1.28653 | 0.57017 |
| 188.34857 | 1.29347 | 0.56843 |
| 188.51714 | 1.30038 | 0.56669 |
| 188.68571 | 1.30728 | 0.56496 |
| 188.85428 | 1.31415 | 0.56323 |
| 189.02286 | 1.321   | 0.56152 |
| 189.19142 | 1.32783 | 0.55981 |
| 189.36    | 1.33464 | 0.55811 |
| 189.52856 | 1.34142 | 0.55641 |
| 189.69714 | 1.34819 | 0.55473 |
| 189.86571 | 1.35494 | 0.55305 |
| 190.03429 | 1.36166 | 0.55137 |
| 190.20285 | 1.36837 | 0.54971 |
| 190.37143 | 1.37505 | 0.54805 |
| 190.53999 | 1.38171 | 0.5464  |
| 190.70857 | 1.38836 | 0.54476 |
| 190.87714 | 1.39498 | 0.54312 |
| 191.04572 | 1.40159 | 0.54149 |
| 191.21428 | 1.40817 | 0.53987 |
| 191.38286 | 1.41473 | 0.53825 |
| 191.55142 | 1.42128 | 0.53664 |
| 191.72    | 1.4278  | 0.53504 |
| 191.88857 | 1.4343  | 0.53345 |
| 192.05714 | 1.44079 | 0.53186 |
| 192.22571 | 1.44725 | 0.53028 |
| 192.39429 | 1.4537  | 0.52871 |
| 192.56285 | 1.46013 | 0.52714 |
| 192.73143 | 1.46653 | 0.52558 |
| 192.89999 | 1.47292 | 0.52402 |
| 193.06857 | 1.47929 | 0.52247 |
| 193.23714 | 1.48564 | 0.52093 |
| 193.40572 | 1.49197 | 0.5194  |
| 193.57428 | 1.49828 | 0.51787 |
| 193.74286 | 1.50457 | 0.51635 |
| 193.91142 | 1.51085 | 0.51483 |
| 194.08    | 1.5171  | 0.51332 |
| 194.24857 | 1.52334 | 0.51182 |
| 194.41714 | 1.52956 | 0.51033 |
| 194.58571 | 1.53576 | 0.50883 |
| 194.75429 | 1.54194 | 0.50735 |
| 194.92285 | 1.5481  | 0.50587 |
| 195.09143 | 1.55425 | 0.5044  |
| 195.25999 | 1.56037 | 0.50294 |
| 195.42857 | 1.56648 | 0.50148 |
| 195.59714 | 1.57257 | 0.50002 |
| 195.76572 | 1.57865 | 0.49858 |
| 195.93428 | 1.5847  | 0.49714 |
| 196.10286 | 1.59074 | 0.4957  |
| 196.27142 | 1.59676 | 0.49427 |
| 196.44    | 1.60276 | 0.49285 |
| 196.60857 | 1.60874 | 0.49143 |
| 196.77715 | 1.61471 | 0.49002 |
| 196.94571 | 1.62066 | 0.48861 |

|           |         |         |
|-----------|---------|---------|
| 197.11429 | 1.62659 | 0.48721 |
| 197.28285 | 1.63251 | 0.48582 |
| 197.45143 | 1.6384  | 0.48443 |
| 197.62    | 1.64428 | 0.48305 |
| 197.78857 | 1.65015 | 0.48167 |
| 197.95714 | 1.65599 | 0.4803  |
| 198.12572 | 1.66182 | 0.47893 |
| 198.29428 | 1.66763 | 0.47757 |
| 198.46286 | 1.67343 | 0.47622 |
| 198.63142 | 1.67921 | 0.47487 |
| 198.8     | 1.68497 | 0.47352 |
| 198.96857 | 1.69071 | 0.47219 |
| 199.13715 | 1.69644 | 0.47085 |
| 199.30571 | 1.70216 | 0.46952 |
| 199.47429 | 1.70785 | 0.4682  |
| 199.64285 | 1.71353 | 0.46689 |
| 199.81143 | 1.71919 | 0.46557 |
| 199.98    | 1.72484 | 0.46427 |
| 200.14857 | 1.73047 | 0.46297 |
| 200.31714 | 1.73609 | 0.46167 |
| 200.48572 | 1.74169 | 0.46038 |
| 200.65428 | 1.74727 | 0.4591  |
| 200.82286 | 1.75283 | 0.45782 |
| 200.99142 | 1.75839 | 0.45654 |
| 201.16    | 1.76392 | 0.45527 |
| 201.32857 | 1.76944 | 0.45401 |
| 201.49715 | 1.77494 | 0.45275 |
| 201.66571 | 1.78043 | 0.45149 |
| 201.83429 | 1.7859  | 0.45024 |
| 202.00285 | 1.79136 | 0.449   |
| 202.17143 | 1.7968  | 0.44776 |
| 202.34    | 1.80223 | 0.44652 |
| 202.50858 | 1.80764 | 0.44529 |
| 202.67714 | 1.81303 | 0.44407 |
| 202.84572 | 1.81841 | 0.44284 |
| 203.01428 | 1.82378 | 0.44163 |
| 203.18286 | 1.82913 | 0.44042 |
| 203.35143 | 1.83446 | 0.43921 |
| 203.52    | 1.83978 | 0.43801 |
| 203.68857 | 1.84509 | 0.43681 |
| 203.85715 | 1.85038 | 0.43562 |
| 204.02571 | 1.85565 | 0.43443 |
| 204.19429 | 1.86092 | 0.43325 |
| 204.36285 | 1.86616 | 0.43207 |
| 204.53143 | 1.87139 | 0.4309  |
| 204.7     | 1.87661 | 0.42973 |
| 204.86858 | 1.88181 | 0.42857 |
| 205.03714 | 1.887   | 0.42741 |
| 205.20572 | 1.89217 | 0.42625 |
| 205.37428 | 1.89733 | 0.4251  |
| 205.54286 | 1.90248 | 0.42396 |
| 205.71143 | 1.90761 | 0.42281 |
| 205.88    | 1.91273 | 0.42168 |

|           |         |         |
|-----------|---------|---------|
| 206.04857 | 1.91783 | 0.42054 |
| 206.21715 | 1.92291 | 0.41941 |
| 206.38571 | 1.92799 | 0.41829 |
| 206.55429 | 1.93305 | 0.41717 |
| 206.72285 | 1.9381  | 0.41606 |
| 206.89143 | 1.94313 | 0.41494 |
| 207.06    | 1.94815 | 0.41384 |
| 207.22858 | 1.95315 | 0.41273 |
| 207.39714 | 1.95814 | 0.41164 |
| 207.56572 | 1.96312 | 0.41054 |
| 207.73428 | 1.96808 | 0.40945 |
| 207.90286 | 1.97303 | 0.40836 |
| 208.07143 | 1.97797 | 0.40728 |
| 208.24001 | 1.98289 | 0.4062  |
| 208.40857 | 1.9878  | 0.40513 |
| 208.57715 | 1.9927  | 0.40406 |
| 208.74571 | 1.99758 | 0.403   |
| 208.91429 | 2.00245 | 0.40193 |
| 209.08286 | 2.00731 | 0.40088 |
| 209.25143 | 2.01215 | 0.39982 |
| 209.42    | 2.01698 | 0.39877 |
| 209.58858 | 2.0218  | 0.39773 |
| 209.75714 | 2.0266  | 0.39669 |
| 209.92572 | 2.03139 | 0.39565 |
| 210.09428 | 2.03617 | 0.39462 |
| 210.26286 | 2.04094 | 0.39359 |
| 210.43143 | 2.04569 | 0.39256 |
| 210.60001 | 2.05043 | 0.39154 |
| 210.76857 | 2.05516 | 0.39052 |
| 210.93715 | 2.05987 | 0.3895  |
| 211.10571 | 2.06457 | 0.38849 |
| 211.27429 | 2.06926 | 0.38749 |
| 211.44286 | 2.07394 | 0.38648 |
| 211.61143 | 2.0786  | 0.38548 |
| 211.78    | 2.08325 | 0.38449 |
| 211.94858 | 2.08789 | 0.3835  |
| 212.11714 | 2.09252 | 0.38251 |
| 212.28572 | 2.09713 | 0.38152 |
| 212.45428 | 2.10174 | 0.38054 |
| 212.62286 | 2.10633 | 0.37956 |
| 212.79143 | 2.1109  | 0.37859 |
| 212.96001 | 2.11547 | 0.37762 |
| 213.12857 | 2.12002 | 0.37665 |
| 213.29715 | 2.12456 | 0.37569 |
| 213.46571 | 2.12909 | 0.37473 |
| 213.63429 | 2.13361 | 0.37378 |
| 213.80286 | 2.13812 | 0.37282 |
| 213.97144 | 2.14261 | 0.37187 |
| 214.14    | 2.14709 | 0.37093 |
| 214.30858 | 2.15156 | 0.36999 |
| 214.47714 | 2.15602 | 0.36905 |
| 214.64572 | 2.16047 | 0.36811 |
| 214.81429 | 2.1649  | 0.36718 |

|           |         |         |
|-----------|---------|---------|
| 214.98286 | 2.16932 | 0.36625 |
| 215.15143 | 2.17373 | 0.36533 |
| 215.32001 | 2.17813 | 0.36441 |
| 215.48857 | 2.18252 | 0.36349 |
| 215.65715 | 2.1869  | 0.36257 |
| 215.82571 | 2.19127 | 0.36166 |
| 215.99429 | 2.19562 | 0.36075 |
| 216.16286 | 2.19996 | 0.35985 |
| 216.33144 | 2.2043  | 0.35895 |
| 216.5     | 2.20862 | 0.35805 |
| 216.66856 | 2.21292 | 0.35715 |
| 216.83714 | 2.21722 | 0.35626 |
| 217.00571 | 2.22151 | 0.35537 |
| 217.17429 | 2.22578 | 0.35449 |
| 217.34285 | 2.23005 | 0.3536  |
| 217.51143 | 2.2343  | 0.35272 |
| 217.67999 | 2.23854 | 0.35185 |
| 217.84857 | 2.24277 | 0.35098 |
| 218.01714 | 2.247   | 0.35011 |
| 218.18571 | 2.2512  | 0.34924 |
| 218.35428 | 2.2554  | 0.34838 |
| 218.52286 | 2.25959 | 0.34751 |
| 218.69142 | 2.26377 | 0.34666 |
| 218.86    | 2.26794 | 0.3458  |
| 219.02856 | 2.27209 | 0.34495 |
| 219.19714 | 2.27624 | 0.3441  |
| 219.36571 | 2.28037 | 0.34326 |
| 219.53429 | 2.28449 | 0.34242 |
| 219.70285 | 2.28861 | 0.34158 |
| 219.87143 | 2.29271 | 0.34074 |
| 220.03999 | 2.2968  | 0.33991 |
| 220.20857 | 2.30089 | 0.33908 |
| 220.37714 | 2.30496 | 0.33825 |
| 220.54572 | 2.30902 | 0.33742 |
| 220.71428 | 2.31307 | 0.3366  |
| 220.88286 | 2.31711 | 0.33578 |
| 221.05142 | 2.32114 | 0.33497 |
| 221.22    | 2.32516 | 0.33415 |
| 221.38857 | 2.32917 | 0.33334 |
| 221.55714 | 2.33317 | 0.33254 |
| 221.72571 | 2.33716 | 0.33173 |
| 221.89429 | 2.34114 | 0.33093 |
| 222.06285 | 2.34511 | 0.33013 |
| 222.23143 | 2.34907 | 0.32933 |
| 222.39999 | 2.35302 | 0.32854 |
| 222.56857 | 2.35696 | 0.32775 |
| 222.73714 | 2.36089 | 0.32696 |
| 222.90572 | 2.36481 | 0.32618 |
| 223.07428 | 2.36872 | 0.32539 |
| 223.24286 | 2.37262 | 0.32461 |
| 223.41142 | 2.37651 | 0.32384 |
| 223.58    | 2.38039 | 0.32306 |
| 223.74857 | 2.38426 | 0.32229 |



|           |         |         |
|-----------|---------|---------|
| 223.91714 | 2.38812 | 0.32152 |
| 224.08571 | 2.39197 | 0.32075 |
| 224.25429 | 2.39582 | 0.31999 |
| 224.42285 | 2.39965 | 0.31923 |
| 224.59143 | 2.40347 | 0.31847 |
| 224.75999 | 2.40728 | 0.31772 |
| 224.92857 | 2.41109 | 0.31696 |
| 225.09714 | 2.41488 | 0.31621 |
| 225.26572 | 2.41867 | 0.31546 |
| 225.43428 | 2.42244 | 0.31472 |
| 225.60286 | 2.42621 | 0.31397 |
| 225.77142 | 2.42997 | 0.31323 |
| 225.94    | 2.43372 | 0.3125  |
| 226.10857 | 2.43745 | 0.31176 |
| 226.27715 | 2.44118 | 0.31103 |
| 226.44571 | 2.4449  | 0.3103  |
| 226.61429 | 2.44862 | 0.30957 |
| 226.78285 | 2.45232 | 0.30884 |
| 226.95143 | 2.45601 | 0.30812 |
| 227.12    | 2.45969 | 0.3074  |
| 227.28857 | 2.46337 | 0.30668 |
| 227.45714 | 2.46703 | 0.30597 |
| 227.62572 | 2.47069 | 0.30525 |
| 227.79428 | 2.47434 | 0.30454 |
| 227.96286 | 2.47798 | 0.30383 |
| 228.13142 | 2.48161 | 0.30313 |
| 228.3     | 2.48523 | 0.30242 |
| 228.46857 | 2.48884 | 0.30172 |
| 228.63715 | 2.49244 | 0.30102 |
| 228.80571 | 2.49604 | 0.30032 |
| 228.97429 | 2.49962 | 0.29963 |
| 229.14285 | 2.5032  | 0.29894 |
| 229.31143 | 2.50677 | 0.29825 |
| 229.48    | 2.51033 | 0.29756 |
| 229.64857 | 2.51388 | 0.29688 |
| 229.81714 | 2.51742 | 0.29619 |
| 229.98572 | 2.52096 | 0.29551 |
| 230.15428 | 2.52448 | 0.29483 |
| 230.32286 | 2.528   | 0.29416 |
| 230.49142 | 2.53151 | 0.29348 |
| 230.66    | 2.53501 | 0.29281 |
| 230.82857 | 2.5385  | 0.29214 |
| 230.99715 | 2.54198 | 0.29148 |
| 231.16571 | 2.54546 | 0.29081 |
| 231.33429 | 2.54892 | 0.29015 |
| 231.50285 | 2.55238 | 0.28949 |
| 231.67143 | 2.55583 | 0.28883 |
| 231.84    | 2.55927 | 0.28817 |
| 232.00858 | 2.56271 | 0.28752 |
| 232.17714 | 2.56613 | 0.28687 |
| 232.34572 | 2.56955 | 0.28622 |
| 232.51428 | 2.57296 | 0.28557 |
| 232.68286 | 2.57636 | 0.28492 |

|           |         |         |
|-----------|---------|---------|
| 232.85143 | 2.57975 | 0.28428 |
| 233.02    | 2.58313 | 0.28364 |
| 233.18857 | 2.58651 | 0.283   |
| 233.35715 | 2.58988 | 0.28236 |
| 233.52571 | 2.59324 | 0.28173 |
| 233.69429 | 2.59659 | 0.28109 |
| 233.86285 | 2.59994 | 0.28046 |
| 234.03143 | 2.60327 | 0.27983 |
| 234.2     | 2.6066  | 0.27921 |
| 234.36858 | 2.60992 | 0.27858 |
| 234.53714 | 2.61323 | 0.27796 |
| 234.70572 | 2.61654 | 0.27734 |
| 234.87428 | 2.61984 | 0.27672 |
| 235.04286 | 2.62313 | 0.2761  |
| 235.21143 | 2.62641 | 0.27549 |
| 235.38    | 2.62968 | 0.27488 |
| 235.54857 | 2.63295 | 0.27427 |
| 235.71715 | 2.63621 | 0.27366 |
| 235.88571 | 2.63946 | 0.27305 |
| 236.05429 | 2.6427  | 0.27244 |
| 236.22285 | 2.64594 | 0.27184 |
| 236.39143 | 2.64917 | 0.27124 |
| 236.56    | 2.65239 | 0.27064 |
| 236.72858 | 2.6556  | 0.27004 |
| 236.89714 | 2.6588  | 0.26945 |
| 237.06572 | 2.662   | 0.26886 |
| 237.23428 | 2.66519 | 0.26826 |
| 237.40286 | 2.66838 | 0.26767 |
| 237.57143 | 2.67155 | 0.26709 |
| 237.74001 | 2.67472 | 0.2665  |
| 237.90857 | 2.67788 | 0.26592 |
| 238.07715 | 2.68103 | 0.26533 |
| 238.24571 | 2.68418 | 0.26475 |
| 238.41429 | 2.68732 | 0.26418 |
| 238.58286 | 2.69045 | 0.2636  |
| 238.75143 | 2.69358 | 0.26302 |
| 238.92    | 2.69669 | 0.26245 |
| 239.08858 | 2.6998  | 0.26188 |
| 239.25714 | 2.70291 | 0.26131 |
| 239.42572 | 2.706   | 0.26074 |
| 239.59428 | 2.70909 | 0.26018 |
| 239.76286 | 2.71217 | 0.25961 |
| 239.93143 | 2.71525 | 0.25905 |
| 240.10001 | 2.71831 | 0.25849 |
| 240.26857 | 2.72137 | 0.25793 |
| 240.43715 | 2.72443 | 0.25738 |
| 240.60571 | 2.72747 | 0.25682 |
| 240.77429 | 2.73051 | 0.25627 |
| 240.94286 | 2.73354 | 0.25572 |
| 241.11143 | 2.73657 | 0.25517 |
| 241.28    | 2.73959 | 0.25462 |
| 241.44858 | 2.7426  | 0.25407 |
| 241.61714 | 2.7456  | 0.25353 |

|           |         |         |
|-----------|---------|---------|
| 241.78572 | 2.7486  | 0.25298 |
| 241.95428 | 2.75159 | 0.25244 |
| 242.12286 | 2.75458 | 0.2519  |
| 242.29143 | 2.75756 | 0.25136 |
| 242.46001 | 2.76053 | 0.25083 |
| 242.62857 | 2.76349 | 0.25029 |
| 242.79715 | 2.76645 | 0.24976 |
| 242.96571 | 2.7694  | 0.24923 |
| 243.13429 | 2.77234 | 0.2487  |
| 243.30286 | 2.77528 | 0.24817 |
| 243.47144 | 2.77821 | 0.24764 |
| 243.64    | 2.78113 | 0.24712 |
| 243.80858 | 2.78405 | 0.2466  |
| 243.97714 | 2.78696 | 0.24607 |
| 244.14572 | 2.78986 | 0.24555 |
| 244.31429 | 2.79276 | 0.24504 |
| 244.48286 | 2.79565 | 0.24452 |
| 244.65143 | 2.79854 | 0.244   |
| 244.82001 | 2.80141 | 0.24349 |
| 244.98857 | 2.80429 | 0.24298 |
| 245.15715 | 2.80715 | 0.24247 |
| 245.32571 | 2.81001 | 0.24196 |
| 245.49429 | 2.81286 | 0.24145 |
| 245.66286 | 2.81571 | 0.24094 |
| 245.83144 | 2.81855 | 0.24044 |
| 246       | 2.82138 | 0.23994 |
| 246.16856 | 2.82421 | 0.23944 |
| 246.33714 | 2.82703 | 0.23894 |
| 246.50571 | 2.82984 | 0.23844 |
| 246.67429 | 2.83265 | 0.23794 |
| 246.84285 | 2.83545 | 0.23745 |
| 247.01143 | 2.83825 | 0.23695 |
| 247.17999 | 2.84104 | 0.23646 |
| 247.34857 | 2.84382 | 0.23597 |
| 247.51714 | 2.8466  | 0.23548 |
| 247.68571 | 2.84937 | 0.23499 |
| 247.85428 | 2.85213 | 0.23451 |
| 248.02286 | 2.85489 | 0.23402 |
| 248.19142 | 2.85764 | 0.23354 |
| 248.36    | 2.86039 | 0.23306 |
| 248.52856 | 2.86313 | 0.23258 |
| 248.69714 | 2.86586 | 0.2321  |
| 248.86571 | 2.86859 | 0.23162 |
| 249.03429 | 2.87131 | 0.23114 |
| 249.20285 | 2.87403 | 0.23067 |
| 249.37143 | 2.87674 | 0.2302  |
| 249.53999 | 2.87944 | 0.22972 |
| 249.70857 | 2.88214 | 0.22925 |
| 249.87714 | 2.88484 | 0.22878 |
| 250.04572 | 2.88752 | 0.22832 |
| 250.21428 | 2.8902  | 0.22785 |
| 250.38286 | 2.89288 | 0.22739 |
| 250.55142 | 2.89554 | 0.22692 |

|           |         |         |
|-----------|---------|---------|
| 250.72    | 2.89821 | 0.22646 |
| 250.88857 | 2.90087 | 0.226   |
| 251.05714 | 2.90352 | 0.22554 |
| 251.22571 | 2.90616 | 0.22508 |
| 251.39429 | 2.9088  | 0.22462 |
| 251.56285 | 2.91144 | 0.22417 |
| 251.73143 | 2.91407 | 0.22372 |
| 251.89999 | 2.91669 | 0.22326 |
| 252.06857 | 2.9193  | 0.22281 |
| 252.23714 | 2.92192 | 0.22236 |
| 252.40572 | 2.92452 | 0.22191 |
| 252.57428 | 2.92712 | 0.22147 |
| 252.74286 | 2.92972 | 0.22102 |
| 252.91142 | 2.9323  | 0.22058 |
| 253.08    | 2.93489 | 0.22013 |
| 253.24857 | 2.93746 | 0.21969 |
| 253.41714 | 2.94004 | 0.21925 |
| 253.58571 | 2.9426  | 0.21881 |
| 253.75429 | 2.94516 | 0.21837 |
| 253.92285 | 2.94772 | 0.21793 |
| 254.09143 | 2.95027 | 0.2175  |
| 254.25999 | 2.95281 | 0.21706 |
| 254.42857 | 2.95535 | 0.21663 |
| 254.59714 | 2.95789 | 0.2162  |
| 254.76572 | 2.96041 | 0.21577 |
| 254.93428 | 2.96294 | 0.21534 |
| 255.10286 | 2.96545 | 0.21491 |
| 255.27142 | 2.96797 | 0.21448 |
| 255.44    | 2.97047 | 0.21406 |
| 255.60857 | 2.97297 | 0.21363 |
| 255.77715 | 2.97547 | 0.21321 |
| 255.94571 | 2.97796 | 0.21279 |
| 256.11429 | 2.98044 | 0.21237 |
| 256.28287 | 2.98292 | 0.21195 |
| 256.45142 | 2.9854  | 0.21153 |
| 256.62    | 2.98787 | 0.21111 |
| 256.78857 | 2.99033 | 0.2107  |
| 256.95715 | 2.99279 | 0.21028 |
| 257.1257  | 2.99524 | 0.20987 |
| 257.29428 | 2.99769 | 0.20946 |
| 257.46286 | 3.00014 | 0.20905 |
| 257.63144 | 3.00257 | 0.20864 |
| 257.79999 | 3.00501 | 0.20823 |
| 257.96857 | 3.00744 | 0.20782 |
| 258.13715 | 3.00986 | 0.20741 |
| 258.30573 | 3.01227 | 0.20701 |
| 258.47427 | 3.01469 | 0.20661 |
| 258.64285 | 3.01709 | 0.2062  |
| 258.81143 | 3.0195  | 0.2058  |
| 258.98001 | 3.02189 | 0.2054  |
| 259.14856 | 3.02429 | 0.205   |
| 259.31714 | 3.02667 | 0.2046  |
| 259.48572 | 3.02905 | 0.20421 |

|           |         |         |
|-----------|---------|---------|
| 259.6543  | 3.03143 | 0.20381 |
| 259.82285 | 3.0338  | 0.20341 |
| 259.99142 | 3.03617 | 0.20302 |
| 260.16    | 3.03853 | 0.20263 |
| 260.32858 | 3.04089 | 0.20224 |
| 260.49713 | 3.04324 | 0.20185 |
| 260.66571 | 3.04559 | 0.20146 |
| 260.83429 | 3.04793 | 0.20107 |
| 261.00287 | 3.05027 | 0.20068 |
| 261.17142 | 3.0526  | 0.20029 |
| 261.34    | 3.05493 | 0.19991 |
| 261.50858 | 3.05725 | 0.19953 |
| 261.67715 | 3.05957 | 0.19914 |
| 261.8457  | 3.06189 | 0.19876 |
| 262.01428 | 3.06419 | 0.19838 |
| 262.18286 | 3.0665  | 0.198   |
| 262.35144 | 3.0688  | 0.19762 |
| 262.51999 | 3.07109 | 0.19724 |
| 262.68857 | 3.07338 | 0.19687 |
| 262.85715 | 3.07566 | 0.19649 |
| 263.02573 | 3.07795 | 0.19612 |
| 263.19427 | 3.08022 | 0.19575 |
| 263.36285 | 3.08249 | 0.19537 |
| 263.53143 | 3.08476 | 0.195   |
| 263.70001 | 3.08702 | 0.19463 |
| 263.86856 | 3.08927 | 0.19426 |
| 264.03714 | 3.09153 | 0.19389 |
| 264.20572 | 3.09377 | 0.19353 |
| 264.3743  | 3.09602 | 0.19316 |
| 264.54285 | 3.09825 | 0.1928  |
| 264.71143 | 3.10049 | 0.19243 |
| 264.88    | 3.10272 | 0.19207 |
| 265.04858 | 3.10494 | 0.19171 |
| 265.21713 | 3.10716 | 0.19135 |
| 265.38571 | 3.10938 | 0.19099 |
| 265.55429 | 3.11159 | 0.19063 |
| 265.72287 | 3.11379 | 0.19027 |
| 265.89142 | 3.11599 | 0.18991 |
| 266.06    | 3.11819 | 0.18956 |
| 266.22858 | 3.12038 | 0.1892  |
| 266.39716 | 3.12257 | 0.18885 |
| 266.5657  | 3.12476 | 0.18849 |
| 266.73428 | 3.12694 | 0.18814 |
| 266.90286 | 3.12911 | 0.18779 |
| 267.07144 | 3.13128 | 0.18744 |
| 267.23999 | 3.13345 | 0.18709 |
| 267.40857 | 3.13561 | 0.18674 |
| 267.57715 | 3.13777 | 0.1864  |
| 267.74573 | 3.13992 | 0.18605 |
| 267.91428 | 3.14207 | 0.1857  |
| 268.08286 | 3.14421 | 0.18536 |
| 268.25143 | 3.14635 | 0.18501 |
| 268.42001 | 3.14849 | 0.18467 |

|           |         |         |
|-----------|---------|---------|
| 268.58856 | 3.15062 | 0.18433 |
| 268.75714 | 3.15274 | 0.18399 |
| 268.92572 | 3.15487 | 0.18365 |
| 269.0943  | 3.15699 | 0.18331 |
| 269.26285 | 3.1591  | 0.18297 |
| 269.43143 | 3.16121 | 0.18264 |
| 269.60001 | 3.16332 | 0.1823  |
| 269.76859 | 3.16542 | 0.18196 |
| 269.93713 | 3.16751 | 0.18163 |
| 270.10571 | 3.16961 | 0.1813  |
| 270.27429 | 3.17169 | 0.18096 |
| 270.44287 | 3.17378 | 0.18063 |
| 270.61142 | 3.17586 | 0.1803  |
| 270.78    | 3.17794 | 0.17997 |
| 270.94858 | 3.18001 | 0.17964 |
| 271.11716 | 3.18208 | 0.17931 |
| 271.28571 | 3.18414 | 0.17899 |
| 271.45428 | 3.1862  | 0.17866 |
| 271.62286 | 3.18826 | 0.17834 |
| 271.79144 | 3.19031 | 0.17801 |
| 271.95999 | 3.19236 | 0.17769 |
| 272.12857 | 3.1944  | 0.17736 |
| 272.29715 | 3.19644 | 0.17704 |
| 272.46573 | 3.19847 | 0.17672 |
| 272.63428 | 3.2005  | 0.1764  |
| 272.80286 | 3.20253 | 0.17608 |
| 272.97144 | 3.20455 | 0.17576 |
| 273.14001 | 3.20657 | 0.17545 |
| 273.30856 | 3.20859 | 0.17513 |
| 273.47714 | 3.2106  | 0.17481 |
| 273.64572 | 3.21261 | 0.1745  |
| 273.8143  | 3.21461 | 0.17418 |
| 273.98285 | 3.21661 | 0.17387 |
| 274.15143 | 3.21861 | 0.17356 |
| 274.32001 | 3.2206  | 0.17324 |
| 274.48859 | 3.22258 | 0.17293 |
| 274.65714 | 3.22457 | 0.17262 |
| 274.82571 | 3.22655 | 0.17231 |
| 274.99429 | 3.22852 | 0.17201 |
| 275.16287 | 3.2305  | 0.1717  |
| 275.33142 | 3.23246 | 0.17139 |
| 275.5     | 3.23443 | 0.17108 |
| 275.66858 | 3.23639 | 0.17078 |
| 275.83713 | 3.23834 | 0.17047 |
| 276.00571 | 3.2403  | 0.17017 |
| 276.17429 | 3.24225 | 0.16987 |
| 276.34286 | 3.24419 | 0.16957 |
| 276.51141 | 3.24613 | 0.16926 |
| 276.67999 | 3.24807 | 0.16896 |
| 276.84857 | 3.25    | 0.16866 |
| 277.01715 | 3.25193 | 0.16837 |
| 277.1857  | 3.25386 | 0.16807 |
| 277.35428 | 3.25578 | 0.16777 |

|           |         |         |
|-----------|---------|---------|
| 277.52286 | 3.2577  | 0.16747 |
| 277.69144 | 3.25961 | 0.16718 |
| 277.85999 | 3.26153 | 0.16688 |
| 278.02856 | 3.26343 | 0.16659 |
| 278.19714 | 3.26534 | 0.16629 |
| 278.36572 | 3.26724 | 0.166   |
| 278.53427 | 3.26913 | 0.16571 |
| 278.70285 | 3.27103 | 0.16542 |
| 278.87143 | 3.27292 | 0.16513 |
| 279.04001 | 3.2748  | 0.16484 |
| 279.20856 | 3.27668 | 0.16455 |
| 279.37714 | 3.27856 | 0.16426 |
| 279.54572 | 3.28044 | 0.16397 |
| 279.71429 | 3.28231 | 0.16369 |
| 279.88284 | 3.28417 | 0.1634  |
| 280.05142 | 3.28604 | 0.16312 |
| 280.22    | 3.2879  | 0.16283 |
| 280.38858 | 3.28976 | 0.16255 |
| 280.55713 | 3.29161 | 0.16226 |
| 280.72571 | 3.29346 | 0.16198 |
| 280.89429 | 3.2953  | 0.1617  |
| 281.06287 | 3.29715 | 0.16142 |
| 281.23141 | 3.29899 | 0.16114 |
| 281.39999 | 3.30082 | 0.16086 |
| 281.56857 | 3.30265 | 0.16058 |
| 281.73715 | 3.30448 | 0.1603  |
| 281.9057  | 3.30631 | 0.16002 |
| 282.07428 | 3.30813 | 0.15975 |
| 282.24286 | 3.30995 | 0.15947 |
| 282.41144 | 3.31176 | 0.1592  |
| 282.57999 | 3.31357 | 0.15892 |
| 282.74857 | 3.31538 | 0.15865 |
| 282.91714 | 3.31718 | 0.15838 |
| 283.08572 | 3.31898 | 0.1581  |
| 283.25427 | 3.32078 | 0.15783 |
| 283.42285 | 3.32257 | 0.15756 |
| 283.59143 | 3.32437 | 0.15729 |
| 283.76001 | 3.32615 | 0.15702 |
| 283.92856 | 3.32793 | 0.15675 |
| 284.09714 | 3.32971 | 0.15648 |
| 284.26572 | 3.33149 | 0.15622 |
| 284.4343  | 3.33327 | 0.15595 |
| 284.60284 | 3.33504 | 0.15568 |
| 284.77142 | 3.3368  | 0.15542 |
| 284.94    | 3.33857 | 0.15515 |
| 285.10858 | 3.34033 | 0.15489 |
| 285.27713 | 3.34208 | 0.15462 |
| 285.44571 | 3.34384 | 0.15436 |
| 285.61429 | 3.34559 | 0.1541  |
| 285.78287 | 3.34733 | 0.15384 |
| 285.95142 | 3.34908 | 0.15358 |
| 286.12    | 3.35082 | 0.15332 |
| 286.28857 | 3.35255 | 0.15306 |

|           |         |         |
|-----------|---------|---------|
| 286.45715 | 3.35429 | 0.1528  |
| 286.6257  | 3.35602 | 0.15254 |
| 286.79428 | 3.35775 | 0.15228 |
| 286.96286 | 3.35947 | 0.15202 |
| 287.13144 | 3.36119 | 0.15177 |
| 287.29999 | 3.36291 | 0.15151 |
| 287.46857 | 3.36462 | 0.15126 |
| 287.63715 | 3.36634 | 0.151   |
| 287.80573 | 3.36804 | 0.15075 |
| 287.97427 | 3.36975 | 0.1505  |
| 288.14285 | 3.37145 | 0.15024 |
| 288.31143 | 3.37315 | 0.14999 |
| 288.48001 | 3.37484 | 0.14974 |
| 288.64856 | 3.37654 | 0.14949 |
| 288.81714 | 3.37823 | 0.14924 |
| 288.98572 | 3.37991 | 0.14899 |
| 289.1543  | 3.38159 | 0.14874 |
| 289.32285 | 3.38327 | 0.14849 |
| 289.49142 | 3.38495 | 0.14825 |
| 289.66    | 3.38663 | 0.148   |
| 289.82858 | 3.3883  | 0.14775 |
| 289.99713 | 3.38996 | 0.14751 |
| 290.16571 | 3.39163 | 0.14726 |
| 290.33429 | 3.39329 | 0.14702 |
| 290.50287 | 3.39495 | 0.14677 |
| 290.67142 | 3.3966  | 0.14653 |
| 290.84    | 3.39825 | 0.14629 |
| 291.00858 | 3.3999  | 0.14605 |
| 291.17715 | 3.40155 | 0.1458  |
| 291.3457  | 3.40319 | 0.14556 |
| 291.51428 | 3.40483 | 0.14532 |
| 291.68286 | 3.40647 | 0.14508 |
| 291.85144 | 3.4081  | 0.14484 |
| 292.01999 | 3.40973 | 0.1446  |
| 292.18857 | 3.41136 | 0.14437 |
| 292.35715 | 3.41299 | 0.14413 |
| 292.52573 | 3.41461 | 0.14389 |
| 292.69427 | 3.41623 | 0.14366 |
| 292.86285 | 3.41784 | 0.14342 |
| 293.03143 | 3.41946 | 0.14319 |
| 293.20001 | 3.42107 | 0.14295 |
| 293.36856 | 3.42267 | 0.14272 |
| 293.53714 | 3.42428 | 0.14248 |
| 293.70572 | 3.42588 | 0.14225 |
| 293.8743  | 3.42748 | 0.14202 |
| 294.04285 | 3.42907 | 0.14179 |
| 294.21143 | 3.43067 | 0.14156 |
| 294.38    | 3.43226 | 0.14133 |
| 294.54858 | 3.43384 | 0.1411  |
| 294.71713 | 3.43543 | 0.14087 |
| 294.88571 | 3.43701 | 0.14064 |
| 295.05429 | 3.43858 | 0.14041 |
| 295.22287 | 3.44016 | 0.14018 |



|           |         |         |
|-----------|---------|---------|
| 295.39142 | 3.44173 | 0.13995 |
| 295.56    | 3.4433  | 0.13973 |
| 295.72858 | 3.44487 | 0.1395  |
| 295.89716 | 3.44643 | 0.13928 |
| 296.0657  | 3.44799 | 0.13905 |
| 296.23428 | 3.44955 | 0.13883 |
| 296.40286 | 3.45111 | 0.1386  |
| 296.57144 | 3.45266 | 0.13838 |
| 296.73999 | 3.45421 | 0.13816 |
| 296.90857 | 3.45576 | 0.13793 |
| 297.07715 | 3.4573  | 0.13771 |
| 297.24573 | 3.45884 | 0.13749 |
| 297.41428 | 3.46038 | 0.13727 |
| 297.58286 | 3.46192 | 0.13705 |
| 297.75143 | 3.46345 | 0.13683 |
| 297.92001 | 3.46498 | 0.13661 |
| 298.08856 | 3.46651 | 0.13639 |
| 298.25714 | 3.46803 | 0.13617 |
| 298.42572 | 3.46956 | 0.13596 |
| 298.5943  | 3.47108 | 0.13574 |
| 298.76285 | 3.47259 | 0.13552 |
| 298.93143 | 3.47411 | 0.13531 |
| 299.10001 | 3.47562 | 0.13509 |
| 299.26859 | 3.47713 | 0.13488 |
| 299.43713 | 3.47863 | 0.13466 |
| 299.60571 | 3.48014 | 0.13445 |
| 299.77429 | 3.48164 | 0.13423 |
| 299.94287 | 3.48314 | 0.13402 |
