# Supplementary material for: Optical phonons in methylammonium lead halide perovskites and implications for charge transport
Source: Royal Society of Chemistry journal article supplement (doi:10.1039/c6mh00275g), 2016-01-01
Supplement: c6mh00275g2.pdf [file c6mh00275g2.pdf]

| wavenumber | Re (epsilon) | Im(epsilon) |
|------------|--------------|-------------|
| [cm-1]     |              |             |
| 10         | 30.13827     | 1.84775     |
| 10.19714   | 30.14915     | 1.886       |
| 10.39429   | 30.16025     | 1.92437     |
| 10.59143   | 30.17157     | 1.96284     |
| 10.78857   | 30.18311     | 2.00144     |
| 10.98571   | 30.19487     | 2.04015     |
| 11.18286   | 30.20685     | 2.07898     |
| 11.38      | 30.21905     | 2.11793     |
| 11.57714   | 30.23147     | 2.157       |
| 11.77429   | 30.24411     | 2.19621     |
| 11.97143   | 30.25697     | 2.23554     |
| 12.16857   | 30.27006     | 2.275       |
| 12.36571   | 30.28336     | 2.3146      |
| 12.56286   | 30.2969      | 2.35434     |
| 12.76      | 30.31065     | 2.39422     |
| 12.95714   | 30.32462     | 2.43424     |
| 13.15429   | 30.33882     | 2.4744      |
| 13.35143   | 30.35325     | 2.51471     |
| 13.54857   | 30.3679      | 2.55518     |
| 13.74571   | 30.38278     | 2.5958      |
| 13.94286   | 30.39788     | 2.63657     |
| 14.14      | 30.41321     | 2.6775      |
| 14.33714   | 30.42876     | 2.71859     |
| 14.53429   | 30.44455     | 2.75985     |
| 14.73143   | 30.46056     | 2.80128     |
| 14.92857   | 30.4768      | 2.84287     |
| 15.12571   | 30.49327     | 2.88464     |
| 15.32286   | 30.50996     | 2.92659     |
| 15.52      | 30.52689     | 2.96871     |
| 15.71714   | 30.54405     | 3.01102     |
| 15.91429   | 30.56143     | 3.05351     |
| 16.11143   | 30.57905     | 3.09619     |
| 16.30857   | 30.5969      | 3.13906     |
| 16.50571   | 30.615       | 3.18213     |
| 16.70286   | 30.63331     | 3.22539     |
| 16.9       | 30.65186     | 3.26885     |
| 17.09714   | 30.67064     | 3.31252     |
| 17.29428   | 30.68966     | 3.35639     |
| 17.49143   | 30.70892     | 3.40048     |
| 17.68857   | 30.72841     | 3.44477     |
| 17.88571   | 30.74814     | 3.48929     |
| 18.08286   | 30.7681      | 3.53403     |
| 18.28      | 30.7883      | 3.57898     |
| 18.47714   | 30.80874     | 3.62417     |
| 18.67429   | 30.82942     | 3.66959     |
| 18.87143   | 30.85034     | 3.71524     |
| 19.06857   | 30.8715      | 3.76113     |
| 19.26571   | 30.8929      | 3.80727     |
| 19.46286   | 30.91454     | 3.85364     |
| 19.66      | 30.93641     | 3.90027     |
| 19.85714   | 30.95855     | 3.94715     |

|          |          |         |
|----------|----------|---------|
| 20.05429 | 30.98091 | 3.99428 |
| 20.25143 | 31.00352 | 4.04168 |
| 20.44857 | 31.02638 | 4.08934 |
| 20.64571 | 31.04948 | 4.13727 |
| 20.84286 | 31.07283 | 4.18547 |
| 21.04    | 31.09642 | 4.23395 |
| 21.23714 | 31.12026 | 4.28271 |
| 21.43429 | 31.14435 | 4.33175 |
| 21.63143 | 31.16868 | 4.38108 |
| 21.82857 | 31.19327 | 4.43071 |
| 22.02571 | 31.2181  | 4.48063 |
| 22.22286 | 31.24319 | 4.53085 |
| 22.42    | 31.26851 | 4.58138 |
| 22.61714 | 31.2941  | 4.63222 |
| 22.81429 | 31.31994 | 4.68338 |
| 23.01143 | 31.34604 | 4.73485 |
| 23.20857 | 31.37238 | 4.78665 |
| 23.40571 | 31.39898 | 4.83878 |
| 23.60286 | 31.42583 | 4.89124 |
| 23.8     | 31.45294 | 4.94404 |
| 23.99714 | 31.48031 | 4.99719 |
| 24.19429 | 31.50793 | 5.05068 |
| 24.39143 | 31.53581 | 5.10453 |
| 24.58857 | 31.56395 | 5.15874 |
| 24.78572 | 31.59235 | 5.21331 |
| 24.98286 | 31.62101 | 5.26825 |
| 25.18    | 31.64992 | 5.32356 |
| 25.37714 | 31.6791  | 5.37926 |
| 25.57429 | 31.70855 | 5.43534 |
| 25.77143 | 31.73825 | 5.49181 |
| 25.96857 | 31.76821 | 5.54868 |
| 26.16571 | 31.79844 | 5.60595 |
| 26.36286 | 31.82893 | 5.66363 |
| 26.56    | 31.85969 | 5.72173 |
| 26.75714 | 31.89071 | 5.78025 |
| 26.95429 | 31.922   | 5.83919 |
| 27.15143 | 31.95356 | 5.89857 |
| 27.34857 | 31.98538 | 5.95838 |
| 27.54571 | 32.01748 | 6.01864 |
| 27.74286 | 32.04982 | 6.07935 |
| 27.94    | 32.08245 | 6.14052 |
| 28.13714 | 32.11535 | 6.20216 |
| 28.33429 | 32.14852 | 6.26427 |
| 28.53143 | 32.18196 | 6.32686 |
| 28.72857 | 32.21567 | 6.38993 |
| 28.92571 | 32.24966 | 6.4535  |
| 29.12286 | 32.28391 | 6.51757 |
| 29.32    | 32.31844 | 6.58215 |
| 29.51714 | 32.35324 | 6.64724 |
| 29.71428 | 32.38832 | 6.71286 |
| 29.91143 | 32.42367 | 6.779   |
| 30.10857 | 32.4593  | 6.84569 |
| 30.30571 | 32.4952  | 6.91292 |

30.50286 32.53137 6.98071  
30.7 32.56782 7.04906  
30.89714 32.60455 7.11798  
31.09429 32.64155 7.18749  
31.29143 32.67883 7.25758  
31.48857 32.71639 7.32827  
31.68571 32.75423 7.39957  
31.88286 32.79234 7.47148  
32.08 32.83073 7.54402  
32.27714 32.8694 7.6172  
32.47429 32.90835 7.69102  
32.67143 32.94757 7.7655  
32.86857 32.98708 7.84064  
33.06572 33.02686 7.91646  
33.26286 33.06691 7.99296  
33.46 33.10725 8.07015  
33.65714 33.14787 8.14806  
33.85429 33.18876 8.22668  
34.05143 33.22993 8.30604  
34.24857 33.27138 8.38613  
34.44571 33.3131 8.46698  
34.64286 33.35511 8.5486  
34.84 33.39738 8.63099  
35.03714 33.43993 8.71417  
35.23429 33.48276 8.79815  
35.43143 33.52586 8.88294  
35.62857 33.56923 8.96857  
35.82571 33.61288 9.05503  
36.02286 33.6568 9.14236  
36.22 33.70099 9.23055  
36.41714 33.74545 9.31962  
36.61428 33.79017 9.40959  
36.81143 33.83517 9.50048  
37.00857 33.88042 9.59229  
37.20572 33.92595 9.68505  
37.40286 33.97173 9.77876  
37.6 34.01777 9.87345  
37.79714 34.06407 9.96913  
37.99429 34.11063 10.06582  
38.19143 34.15745 10.16354  
38.38857 34.20451 10.2623  
38.58571 34.25182 10.36211  
38.78286 34.29939 10.46301  
38.98 34.34719 10.56501  
39.17714 34.39523 10.66813  
39.37429 34.44351 10.77238  
39.57143 34.49202 10.87779  
39.76857 34.54076 10.98437  
39.96571 34.58973 11.09216  
40.16286 34.63892 11.20116  
40.36 34.68832 11.31141  
40.55714 34.73795 11.42292  
40.75428 34.78777 11.53571

|          |          |          |
|----------|----------|----------|
| 40.95143 | 34.83781 | 11.64982 |
| 41.14857 | 34.88803 | 11.76526 |
| 41.34571 | 34.93845 | 11.88206 |
| 41.54286 | 34.98905 | 12.00024 |
| 41.74    | 35.03983 | 12.11984 |
| 41.93714 | 35.09078 | 12.24086 |
| 42.13428 | 35.1419  | 12.36336 |
| 42.33143 | 35.19316 | 12.48734 |
| 42.52857 | 35.24459 | 12.61284 |
| 42.72572 | 35.29614 | 12.73989 |
| 42.92286 | 35.34782 | 12.86851 |
| 43.12    | 35.39963 | 12.99874 |
| 43.31714 | 35.45155 | 13.13062 |
| 43.51429 | 35.50356 | 13.26416 |
| 43.71143 | 35.55566 | 13.3994  |
| 43.90857 | 35.60783 | 13.53638 |
| 44.10571 | 35.66006 | 13.67513 |
| 44.30286 | 35.71235 | 13.81569 |
| 44.5     | 35.76467 | 13.9581  |
| 44.69714 | 35.81701 | 14.10238 |
| 44.89429 | 35.86935 | 14.24857 |
| 45.09143 | 35.92168 | 14.39673 |
| 45.28857 | 35.97398 | 14.54688 |
| 45.48571 | 36.02622 | 14.69906 |
| 45.68286 | 36.0784  | 14.85333 |
| 45.88    | 36.13049 | 15.00971 |
| 46.07714 | 36.18246 | 15.16827 |
| 46.27428 | 36.23429 | 15.32902 |
| 46.47143 | 36.28598 | 15.49205 |
| 46.66857 | 36.33747 | 15.65737 |
| 46.86572 | 36.38875 | 15.82504 |
| 47.06286 | 36.43978 | 15.99512 |
| 47.26    | 36.49054 | 16.16766 |
| 47.45714 | 36.541   | 16.3427  |
| 47.65429 | 36.59111 | 16.5203  |
| 47.85143 | 36.64085 | 16.7005  |
| 48.04857 | 36.69017 | 16.88339 |
| 48.24572 | 36.73904 | 17.069   |
| 48.44286 | 36.78741 | 17.2574  |
| 48.64    | 36.83525 | 17.44864 |
| 48.83714 | 36.88249 | 17.6428  |
| 49.03429 | 36.92909 | 17.83993 |
| 49.23143 | 36.975   | 18.0401  |
| 49.42857 | 37.02016 | 18.24336 |
| 49.62571 | 37.06451 | 18.4498  |
| 49.82286 | 37.108   | 18.65949 |
| 50.02    | 37.15055 | 18.87248 |
| 50.21714 | 37.19208 | 19.08885 |
| 50.41429 | 37.23254 | 19.30868 |
| 50.61143 | 37.27183 | 19.53203 |
| 50.80857 | 37.30988 | 19.759   |
| 51.00571 | 37.3466  | 19.98964 |
| 51.20286 | 37.3819  | 20.22405 |

|          |          |          |
|----------|----------|----------|
| 51.4     | 37.41566 | 20.4623  |
| 51.59714 | 37.44781 | 20.70446 |
| 51.79428 | 37.47821 | 20.95063 |
| 51.99143 | 37.50677 | 21.20088 |
| 52.18857 | 37.53334 | 21.45529 |
| 52.38572 | 37.55781 | 21.71395 |
| 52.58286 | 37.58002 | 21.97694 |
| 52.78    | 37.59986 | 22.24434 |
| 52.97714 | 37.61714 | 22.51624 |
| 53.17429 | 37.63171 | 22.79272 |
| 53.37143 | 37.64341 | 23.07386 |
| 53.56857 | 37.65203 | 23.35974 |
| 53.76571 | 37.65741 | 23.65042 |
| 53.96286 | 37.65932 | 23.946   |
| 54.16    | 37.65755 | 24.24654 |
| 54.35714 | 37.6519  | 24.55212 |
| 54.55429 | 37.64209 | 24.86279 |
| 54.75143 | 37.62789 | 25.17861 |
| 54.94857 | 37.60903 | 25.49965 |
| 55.14571 | 37.58524 | 25.82595 |
| 55.34286 | 37.5562  | 26.15754 |
| 55.54    | 37.52163 | 26.49446 |
| 55.73714 | 37.48118 | 26.83672 |
| 55.93428 | 37.43453 | 27.18433 |
| 56.13143 | 37.38131 | 27.53729 |
| 56.32857 | 37.32114 | 27.89558 |
| 56.52571 | 37.25364 | 28.25917 |
| 56.72286 | 37.17839 | 28.62799 |
| 56.92    | 37.09497 | 29.00196 |
| 57.11714 | 37.00294 | 29.38101 |
| 57.31429 | 36.90182 | 29.76498 |
| 57.51143 | 36.79116 | 30.15374 |
| 57.70857 | 36.67045 | 30.54711 |
| 57.90572 | 36.53919 | 30.94486 |
| 58.10286 | 36.39686 | 31.34672 |
| 58.3     | 36.24292 | 31.75243 |
| 58.49714 | 36.07683 | 32.16163 |
| 58.69429 | 35.89804 | 32.57394 |
| 58.89143 | 35.706   | 32.98893 |
| 59.08857 | 35.50016 | 33.4061  |
| 59.28571 | 35.27995 | 33.82491 |
| 59.48286 | 35.04485 | 34.24477 |
| 59.68    | 34.79431 | 34.66499 |
| 59.87714 | 34.52782 | 35.08483 |
| 60.07429 | 34.2449  | 35.50351 |
| 60.27143 | 33.9451  | 35.92014 |
| 60.46857 | 33.628   | 36.33378 |
| 60.66571 | 33.29323 | 36.74341 |
| 60.86286 | 32.9405  | 37.14795 |
| 61.06    | 32.56958 | 37.54624 |
| 61.25714 | 32.18031 | 37.93704 |
| 61.45428 | 31.77261 | 38.31909 |
| 61.65143 | 31.34654 | 38.69104 |

|          |          |          |
|----------|----------|----------|
| 61.84857 | 30.90223 | 39.05149 |
| 62.04572 | 30.43996 | 39.39901 |
| 62.24286 | 29.96013 | 39.73216 |
| 62.44    | 29.46331 | 40.04944 |
| 62.63714 | 28.95014 | 40.34941 |
| 62.83429 | 28.42152 | 40.63059 |
| 63.03143 | 27.87842 | 40.89157 |
| 63.22857 | 27.32203 | 41.13099 |
| 63.42571 | 26.75367 | 41.34753 |
| 63.62286 | 26.17481 | 41.54004 |
| 63.82    | 25.58709 | 41.70741 |
| 64.01714 | 24.99226 | 41.84873 |
| 64.21429 | 24.39222 | 41.9632  |
| 64.41143 | 23.78896 | 42.05022 |
| 64.60857 | 23.18456 | 42.1094  |
| 64.80572 | 22.58115 | 42.14053 |
| 65.00285 | 21.98095 | 42.14362 |
| 65.2     | 21.38609 | 42.11892 |
| 65.39714 | 20.79875 | 42.06688 |
| 65.59428 | 20.22106 | 41.9882  |
| 65.79143 | 19.65507 | 41.88377 |
| 65.98857 | 19.10271 | 41.75471 |
| 66.18571 | 18.56581 | 41.6023  |
| 66.38286 | 18.04602 | 41.42802 |
| 66.58    | 17.54483 | 41.2335  |
| 66.77715 | 17.06356 | 41.02047 |
| 66.97429 | 16.60332 | 40.79079 |
| 67.17142 | 16.16504 | 40.54639 |
| 67.36857 | 15.74938 | 40.28923 |
| 67.56571 | 15.35685 | 40.02131 |
| 67.76286 | 14.98773 | 39.74462 |
| 67.96    | 14.64211 | 39.46112 |
| 68.15714 | 14.3199  | 39.17274 |
| 68.35429 | 14.02083 | 38.88131 |
| 68.55143 | 13.74447 | 38.5886  |
| 68.74857 | 13.49024 | 38.29627 |
| 68.94572 | 13.25745 | 38.00589 |
| 69.14286 | 13.04529 | 37.71888 |
| 69.34    | 12.85287 | 37.43657 |
| 69.53714 | 12.6792  | 37.16013 |
| 69.73428 | 12.52326 | 36.89063 |
| 69.93143 | 12.38398 | 36.62901 |
| 70.12857 | 12.26026 | 36.37608 |
| 70.32571 | 12.15098 | 36.13253 |
| 70.52286 | 12.05502 | 35.89895 |
| 70.72    | 11.97127 | 35.6758  |
| 70.91714 | 11.89863 | 35.46346 |
| 71.11429 | 11.83603 | 35.2622  |
| 71.31143 | 11.78242 | 35.07222 |
| 71.50857 | 11.73679 | 34.89362 |
| 71.70571 | 11.69818 | 34.72646 |
| 71.90285 | 11.66565 | 34.5707  |
| 72.1     | 11.63831 | 34.42627 |

|          |          |          |
|----------|----------|----------|
| 72.29714 | 11.61534 | 34.29303 |
| 72.49429 | 11.59593 | 34.17081 |
| 72.69143 | 11.57933 | 34.05941 |
| 72.88857 | 11.56486 | 33.95857 |
| 73.08572 | 11.55184 | 33.86802 |
| 73.28286 | 11.53967 | 33.78747 |
| 73.48    | 11.52778 | 33.71659 |
| 73.67714 | 11.51566 | 33.65507 |
| 73.87428 | 11.5028  | 33.60255 |
| 74.07143 | 11.48876 | 33.55867 |
| 74.26857 | 11.47313 | 33.52309 |
| 74.46571 | 11.45554 | 33.49543 |
| 74.66286 | 11.43564 | 33.47535 |
| 74.86    | 11.41312 | 33.46246 |
| 75.05714 | 11.38769 | 33.4564  |
| 75.25429 | 11.3591  | 33.45681 |
| 75.45143 | 11.32711 | 33.46334 |
| 75.64857 | 11.29153 | 33.47563 |
| 75.84571 | 11.25216 | 33.49331 |
| 76.04285 | 11.20885 | 33.51607 |
| 76.24    | 11.16145 | 33.54355 |
| 76.43714 | 11.10984 | 33.57543 |
| 76.63428 | 11.05391 | 33.61138 |
| 76.83143 | 10.99357 | 33.65109 |
| 77.02857 | 10.92874 | 33.69425 |
| 77.22572 | 10.85936 | 33.74055 |
| 77.42286 | 10.78538 | 33.78971 |
| 77.62    | 10.70678 | 33.84145 |
| 77.81715 | 10.62351 | 33.89547 |
| 78.01428 | 10.53557 | 33.95151 |
| 78.21143 | 10.44294 | 34.00932 |
| 78.40857 | 10.34564 | 34.06863 |
| 78.60571 | 10.24368 | 34.12919 |
| 78.80286 | 10.13707 | 34.19078 |
| 79       | 10.02584 | 34.25314 |
| 79.19714 | 9.91003  | 34.31607 |
| 79.39429 | 9.78969  | 34.37933 |
| 79.59143 | 9.66485  | 34.44272 |
| 79.78857 | 9.53557  | 34.50604 |
| 79.98572 | 9.40192  | 34.56909 |
| 80.18285 | 9.26396  | 34.63166 |
| 80.38    | 9.12174  | 34.69358 |
| 80.57714 | 8.97535  | 34.75467 |
| 80.77428 | 8.82486  | 34.81475 |
| 80.97143 | 8.67036  | 34.87366 |
| 81.16857 | 8.51193  | 34.93124 |
| 81.36572 | 8.34967  | 34.98734 |
| 81.56286 | 8.18365  | 35.0418  |
| 81.76    | 8.01398  | 35.09447 |
| 81.95715 | 7.84075  | 35.14524 |
| 82.15429 | 7.66407  | 35.19396 |
| 82.35143 | 7.48404  | 35.2405  |
| 82.54857 | 7.30076  | 35.28474 |

|          |          |          |
|----------|----------|----------|
| 82.74571 | 7.11434  | 35.32658 |
| 82.94286 | 6.92488  | 35.36589 |
| 83.14    | 6.73251  | 35.40258 |
| 83.33714 | 6.53734  | 35.43655 |
| 83.53429 | 6.33947  | 35.4677  |
| 83.73143 | 6.13902  | 35.49594 |
| 83.92857 | 5.93612  | 35.52119 |
| 84.12572 | 5.73088  | 35.54337 |
| 84.32286 | 5.52341  | 35.56239 |
| 84.52    | 5.31385  | 35.57821 |
| 84.71714 | 5.10231  | 35.59076 |
| 84.91428 | 4.8889   | 35.59995 |
| 85.11143 | 4.67375  | 35.60576 |
| 85.30857 | 4.45698  | 35.60812 |
| 85.50571 | 4.23873  | 35.60699 |
| 85.70286 | 4.01909  | 35.60233 |
| 85.9     | 3.7982   | 35.59411 |
| 86.09715 | 3.57619  | 35.58229 |
| 86.29429 | 3.35316  | 35.56683 |
| 86.49143 | 3.12924  | 35.54774 |
| 86.68857 | 2.90456  | 35.52497 |
| 86.88571 | 2.67922  | 35.49852 |
| 87.08286 | 2.45335  | 35.46838 |
| 87.28    | 2.22706  | 35.43453 |
| 87.47714 | 2.00047  | 35.39698 |
| 87.67429 | 1.77369  | 35.35573 |
| 87.87143 | 1.54684  | 35.31077 |
| 88.06857 | 1.32004  | 35.26213 |
| 88.26572 | 1.09338  | 35.20981 |
| 88.46286 | 0.86698  | 35.15383 |
| 88.66    | 0.64095  | 35.0942  |
| 88.85714 | 0.4154   | 35.03095 |
| 89.05428 | 0.19041  | 34.96411 |
| 89.25143 | -0.0339  | 34.8937  |
| 89.44857 | -0.25743 | 34.81974 |
| 89.64571 | -0.48009 | 34.74229 |
| 89.84286 | -0.70178 | 34.66138 |
| 90.04    | -0.92241 | 34.57703 |
| 90.23714 | -1.14189 | 34.48931 |
| 90.43429 | -1.36013 | 34.39825 |
| 90.63143 | -1.57704 | 34.30389 |
| 90.82858 | -1.79254 | 34.2063  |
| 91.02571 | -2.00654 | 34.10551 |
| 91.22285 | -2.21899 | 34.00159 |
| 91.42    | -2.42979 | 33.89459 |
| 91.61714 | -2.63887 | 33.78456 |
| 91.81429 | -2.84616 | 33.67156 |
| 92.01143 | -3.0516  | 33.55566 |
| 92.20857 | -3.25512 | 33.43691 |
| 92.40572 | -3.45665 | 33.31538 |
| 92.60286 | -3.65614 | 33.19113 |
| 92.8     | -3.85353 | 33.06423 |
| 92.99715 | -4.04876 | 32.93475 |



|           |           |          |
|-----------|-----------|----------|
| 93.19428  | -4.24178  | 32.80275 |
| 93.39143  | -4.43255  | 32.6683  |
| 93.58857  | -4.62101  | 32.53146 |
| 93.78571  | -4.80713  | 32.39232 |
| 93.98286  | -4.99086  | 32.25093 |
| 94.18     | -5.17216  | 32.10737 |
| 94.37714  | -5.351    | 31.96169 |
| 94.57429  | -5.52734  | 31.814   |
| 94.77143  | -5.70116  | 31.66435 |
| 94.96857  | -5.87241  | 31.5128  |
| 95.16572  | -6.04108  | 31.35944 |
| 95.36285  | -6.20714  | 31.20434 |
| 95.56     | -6.37057  | 31.04755 |
| 95.75714  | -6.53136  | 30.88915 |
| 95.95428  | -6.68948  | 30.72922 |
| 96.15143  | -6.84492  | 30.56783 |
| 96.34857  | -6.99766  | 30.40503 |
| 96.54572  | -7.1477   | 30.2409  |
| 96.74286  | -7.29503  | 30.07551 |
| 96.94     | -7.43963  | 29.90893 |
| 97.13715  | -7.58152  | 29.74122 |
| 97.33428  | -7.72067  | 29.57246 |
| 97.53143  | -7.8571   | 29.40269 |
| 97.72857  | -7.9908   | 29.23199 |
| 97.92571  | -8.12178  | 29.06042 |
| 98.12286  | -8.25003  | 28.88804 |
| 98.32     | -8.37558  | 28.71492 |
| 98.51714  | -8.49841  | 28.54112 |
| 98.71429  | -8.61855  | 28.36669 |
| 98.91143  | -8.736    | 28.1917  |
| 99.10857  | -8.85077  | 28.01619 |
| 99.30572  | -8.96288  | 27.84024 |
| 99.50285  | -9.07234  | 27.66389 |
| 99.7      | -9.17916  | 27.4872  |
| 99.89714  | -9.28337  | 27.31021 |
| 100.09428 | -9.38498  | 27.13299 |
| 100.29143 | -9.484    | 26.95558 |
| 100.48857 | -9.58047  | 26.77804 |
| 100.68571 | -9.67439  | 26.6004  |
| 100.88286 | -9.7658   | 26.42273 |
| 101.08    | -9.85471  | 26.24506 |
| 101.27715 | -9.94114  | 26.06743 |
| 101.47429 | -10.02513 | 25.8899  |
| 101.67142 | -10.10669 | 25.71252 |
| 101.86857 | -10.18585 | 25.53531 |
| 102.06571 | -10.26263 | 25.3583  |
| 102.26286 | -10.33706 | 25.18156 |
| 102.46    | -10.40918 | 25.00511 |
| 102.65714 | -10.479   | 24.82899 |
| 102.85429 | -10.54656 | 24.65324 |
| 103.05143 | -10.61188 | 24.47789 |
| 103.24857 | -10.67498 | 24.30297 |
| 103.44572 | -10.73591 | 24.12852 |

|           |           |          |
|-----------|-----------|----------|
| 103.64286 | -10.79469 | 23.95457 |
| 103.84    | -10.85134 | 23.78115 |
| 104.03714 | -10.90591 | 23.60827 |
| 104.23428 | -10.9584  | 23.43598 |
| 104.43143 | -11.00887 | 23.2643  |
| 104.62857 | -11.05733 | 23.09326 |
| 104.82571 | -11.10383 | 22.92287 |
| 105.02286 | -11.14838 | 22.75318 |
| 105.22    | -11.19101 | 22.58419 |
| 105.41714 | -11.23176 | 22.41592 |
| 105.61429 | -11.27067 | 22.24841 |
| 105.81143 | -11.30775 | 22.08167 |
| 106.00857 | -11.34304 | 21.91572 |
| 106.20571 | -11.37657 | 21.75057 |
| 106.40285 | -11.40837 | 21.58625 |
| 106.6     | -11.43847 | 21.42277 |
| 106.79714 | -11.46689 | 21.26015 |
| 106.99429 | -11.49368 | 21.0984  |
| 107.19143 | -11.51885 | 20.93752 |
| 107.38857 | -11.54244 | 20.77756 |
| 107.58572 | -11.56448 | 20.6185  |
| 107.78286 | -11.58499 | 20.46036 |
| 107.98    | -11.604   | 20.30316 |
| 108.17714 | -11.62155 | 20.14691 |
| 108.37428 | -11.63766 | 19.9916  |
| 108.57143 | -11.65236 | 19.83726 |
| 108.76857 | -11.66567 | 19.6839  |
| 108.96571 | -11.67763 | 19.53151 |
| 109.16286 | -11.68826 | 19.38011 |
| 109.36    | -11.69758 | 19.2297  |
| 109.55714 | -11.70563 | 19.08029 |
| 109.75429 | -11.71243 | 18.93188 |
| 109.95143 | -11.71801 | 18.78449 |
| 110.14857 | -11.72239 | 18.63811 |
| 110.34571 | -11.7256  | 18.49275 |
| 110.54285 | -11.72766 | 18.34841 |
| 110.74    | -11.7286  | 18.2051  |
| 110.93714 | -11.72844 | 18.06281 |
| 111.13428 | -11.72721 | 17.92155 |
| 111.33143 | -11.72493 | 17.78132 |
| 111.52857 | -11.72162 | 17.64213 |
| 111.72572 | -11.71731 | 17.50397 |
| 111.92286 | -11.71202 | 17.36684 |
| 112.12    | -11.70577 | 17.23074 |
| 112.31715 | -11.69858 | 17.09568 |
| 112.51428 | -11.69048 | 16.96166 |
| 112.71143 | -11.68149 | 16.82867 |
| 112.90857 | -11.67163 | 16.69671 |
| 113.10571 | -11.66091 | 16.56577 |
| 113.30286 | -11.64937 | 16.43587 |
| 113.5     | -11.63701 | 16.30699 |
| 113.69714 | -11.62386 | 16.17914 |
| 113.89429 | -11.60995 | 16.0523  |

|           |           |          |
|-----------|-----------|----------|
| 114.09143 | -11.59528 | 15.92649 |
| 114.28857 | -11.57988 | 15.80169 |
| 114.48572 | -11.56376 | 15.6779  |
| 114.68285 | -11.54695 | 15.55512 |
| 114.88    | -11.52946 | 15.43335 |
| 115.07714 | -11.51131 | 15.31257 |
| 115.27428 | -11.49252 | 15.19279 |
| 115.47143 | -11.4731  | 15.07401 |
| 115.66857 | -11.45307 | 14.95621 |
| 115.86572 | -11.43244 | 14.8394  |
| 116.06286 | -11.41124 | 14.72357 |
| 116.26    | -11.38948 | 14.60871 |
| 116.45715 | -11.36717 | 14.49482 |
| 116.65429 | -11.34433 | 14.3819  |
| 116.85143 | -11.32097 | 14.26993 |
| 117.04857 | -11.29711 | 14.15892 |
| 117.24571 | -11.27276 | 14.04885 |
| 117.44286 | -11.24794 | 13.93973 |
| 117.64    | -11.22266 | 13.83155 |
| 117.83714 | -11.19693 | 13.72429 |
| 118.03429 | -11.17078 | 13.61796 |
| 118.23143 | -11.14419 | 13.51255 |
| 118.42857 | -11.1172  | 13.40806 |
| 118.62572 | -11.08982 | 13.30447 |
| 118.82286 | -11.06205 | 13.20178 |
| 119.02    | -11.03392 | 13.09999 |
| 119.21714 | -11.00542 | 12.99909 |
| 119.41428 | -10.97657 | 12.89906 |
| 119.61143 | -10.94739 | 12.79992 |
| 119.80857 | -10.91789 | 12.70164 |
| 120.00571 | -10.88806 | 12.60423 |
| 120.20286 | -10.85793 | 12.50767 |
| 120.4     | -10.82751 | 12.41197 |
| 120.59715 | -10.7968  | 12.31711 |
| 120.79429 | -10.76582 | 12.22309 |
| 120.99143 | -10.73457 | 12.1299  |
| 121.18857 | -10.70307 | 12.03753 |
| 121.38571 | -10.67133 | 11.94598 |
| 121.58286 | -10.63934 | 11.85525 |
| 121.78    | -10.60713 | 11.76531 |
| 121.97714 | -10.5747  | 11.67618 |
| 122.17429 | -10.54205 | 11.58784 |
| 122.37143 | -10.5092  | 11.50028 |
| 122.56857 | -10.47616 | 11.4135  |
| 122.76572 | -10.44294 | 11.3275  |
| 122.96286 | -10.40953 | 11.24226 |
| 123.16    | -10.37595 | 11.15778 |
| 123.35714 | -10.34221 | 11.07406 |
| 123.55428 | -10.3083  | 10.99107 |
| 123.75143 | -10.27425 | 10.90883 |
| 123.94857 | -10.24006 | 10.82732 |
| 124.14571 | -10.20573 | 10.74654 |
| 124.34286 | -10.17127 | 10.66648 |

|           |           |          |
|-----------|-----------|----------|
| 124.54    | -10.13669 | 10.58714 |
| 124.73714 | -10.10198 | 10.5085  |
| 124.93429 | -10.06717 | 10.43056 |
| 125.13143 | -10.03226 | 10.35332 |
| 125.32858 | -9.99724  | 10.27676 |
| 125.52571 | -9.96213  | 10.2009  |
| 125.72285 | -9.92693  | 10.1257  |
| 125.92    | -9.89165  | 10.05118 |
| 126.11714 | -9.8563   | 9.97732  |
| 126.31429 | -9.82087  | 9.90412  |
| 126.51143 | -9.78537  | 9.83157  |
| 126.70857 | -9.74981  | 9.75967  |
| 126.90572 | -9.7142   | 9.6884   |
| 127.10286 | -9.67853  | 9.61777  |
| 127.3     | -9.64281  | 9.54777  |
| 127.49715 | -9.60705  | 9.47839  |
| 127.69428 | -9.57125  | 9.40963  |
| 127.89143 | -9.53542  | 9.34148  |
| 128.08858 | -9.49955  | 9.27392  |
| 128.28572 | -9.46366  | 9.20697  |
| 128.48286 | -9.42775  | 9.14062  |
| 128.67999 | -9.39182  | 9.07485  |
| 128.87714 | -9.35587  | 9.00967  |
| 129.07428 | -9.31991  | 8.94506  |
| 129.27142 | -9.28395  | 8.88102  |
| 129.46857 | -9.24797  | 8.81755  |
| 129.66571 | -9.212    | 8.75463  |
| 129.86285 | -9.17603  | 8.69227  |
| 130.06    | -9.14006  | 8.63046  |
| 130.25714 | -9.1041   | 8.5692   |
| 130.45428 | -9.06816  | 8.50847  |
| 130.65143 | -9.03223  | 8.44828  |
| 130.84857 | -8.99632  | 8.38861  |
| 131.04572 | -8.96042  | 8.32947  |
| 131.24286 | -8.92456  | 8.27085  |
| 131.44    | -8.88871  | 8.21274  |
| 131.63715 | -8.8529   | 8.15513  |
| 131.83429 | -8.81711  | 8.09804  |
| 132.03143 | -8.78135  | 8.04144  |
| 132.22858 | -8.74564  | 7.98533  |
| 132.42572 | -8.70996  | 7.92971  |
| 132.62286 | -8.67432  | 7.87457  |
| 132.82001 | -8.63872  | 7.81992  |
| 133.01714 | -8.60317  | 7.76574  |
| 133.21428 | -8.56767  | 7.71203  |
| 133.41142 | -8.53221  | 7.65878  |
| 133.60857 | -8.4968   | 7.60599  |
| 133.80571 | -8.46145  | 7.55366  |
| 134.00285 | -8.42615  | 7.50178  |
| 134.2     | -8.3909   | 7.45035  |
| 134.39714 | -8.35572  | 7.39936  |
| 134.59428 | -8.32059  | 7.34881  |
| 134.79143 | -8.28552  | 7.29869  |

|           |          |         |
|-----------|----------|---------|
| 134.98857 | -8.25052 | 7.24901 |
| 135.18571 | -8.21558 | 7.19974 |
| 135.38286 | -8.18071 | 7.1509  |
| 135.58    | -8.1459  | 7.10248 |
| 135.77715 | -8.11116 | 7.05447 |
| 135.97429 | -8.07649 | 7.00687 |
| 136.17143 | -8.04189 | 6.95967 |
| 136.36858 | -8.00737 | 6.91288 |
| 136.56572 | -7.97291 | 6.86648 |
| 136.76286 | -7.93853 | 6.82048 |
| 136.96001 | -7.90423 | 6.77486 |
| 137.15715 | -7.87001 | 6.72963 |
| 137.35428 | -7.83587 | 6.68479 |
| 137.55142 | -7.8018  | 6.64032 |
| 137.74857 | -7.76781 | 6.59622 |
| 137.94571 | -7.73391 | 6.55249 |
| 138.14285 | -7.70008 | 6.50914 |
| 138.34    | -7.66634 | 6.46614 |
| 138.53714 | -7.63268 | 6.4235  |
| 138.73428 | -7.59911 | 6.38123 |
| 138.93143 | -7.56563 | 6.3393  |
| 139.12857 | -7.53223 | 6.29772 |
| 139.32571 | -7.49891 | 6.25649 |
| 139.52286 | -7.46569 | 6.2156  |
| 139.72    | -7.43255 | 6.17505 |
| 139.91714 | -7.3995  | 6.13484 |
| 140.11429 | -7.36654 | 6.09496 |
| 140.31143 | -7.33367 | 6.0554  |
| 140.50858 | -7.3009  | 6.01618 |
| 140.70572 | -7.26821 | 5.97727 |
| 140.90286 | -7.23561 | 5.93869 |
| 141.10001 | -7.20311 | 5.90042 |
| 141.29715 | -7.1707  | 5.86247 |
| 141.49429 | -7.13839 | 5.82483 |
| 141.69142 | -7.10617 | 5.7875  |
| 141.88857 | -7.07404 | 5.75047 |
| 142.08571 | -7.04201 | 5.71374 |
| 142.28285 | -7.01007 | 5.67731 |
| 142.48    | -6.97823 | 5.64117 |
| 142.67714 | -6.94648 | 5.60533 |
| 142.87428 | -6.91484 | 5.56978 |
| 143.07143 | -6.88328 | 5.53451 |
| 143.26857 | -6.85183 | 5.49954 |
| 143.46571 | -6.82047 | 5.46484 |
| 143.66286 | -6.7892  | 5.43042 |
| 143.86    | -6.75804 | 5.39627 |
| 144.05714 | -6.72697 | 5.3624  |
| 144.25429 | -6.696   | 5.32881 |
| 144.45143 | -6.66513 | 5.29548 |
| 144.64857 | -6.63436 | 5.26241 |
| 144.84572 | -6.60368 | 5.22961 |
| 145.04286 | -6.57311 | 5.19707 |
| 145.24001 | -6.54263 | 5.16479 |

|           |          |         |
|-----------|----------|---------|
| 145.43715 | -6.51225 | 5.13276 |
| 145.63429 | -6.48197 | 5.10099 |
| 145.83144 | -6.45179 | 5.06947 |
| 146.02856 | -6.42171 | 5.0382  |
| 146.22571 | -6.39173 | 5.00718 |
| 146.42285 | -6.36185 | 4.97639 |
| 146.62    | -6.33206 | 4.94585 |
| 146.81714 | -6.30238 | 4.91555 |
| 147.01428 | -6.27279 | 4.88549 |
| 147.21143 | -6.24331 | 4.85566 |
| 147.40857 | -6.21392 | 4.82606 |
| 147.60571 | -6.18463 | 4.79669 |
| 147.80286 | -6.15544 | 4.76756 |
| 148       | -6.12636 | 4.73864 |
| 148.19714 | -6.09737 | 4.70995 |
| 148.39429 | -6.06848 | 4.68149 |
| 148.59143 | -6.03968 | 4.65324 |
| 148.78857 | -6.01099 | 4.62521 |
| 148.98572 | -5.9824  | 4.5974  |
| 149.18286 | -5.95391 | 4.5698  |
| 149.38    | -5.92551 | 4.54241 |
| 149.57715 | -5.89721 | 4.51523 |
| 149.77429 | -5.86901 | 4.48826 |
| 149.97144 | -5.84091 | 4.46149 |
| 150.16856 | -5.81291 | 4.43494 |
| 150.36571 | -5.78501 | 4.40858 |
| 150.56285 | -5.7572  | 4.38242 |
| 150.75999 | -5.7295  | 4.35646 |
| 150.95714 | -5.70189 | 4.33069 |
| 151.15428 | -5.67438 | 4.30512 |
| 151.35143 | -5.64696 | 4.27975 |
| 151.54857 | -5.61964 | 4.25456 |
| 151.74571 | -5.59242 | 4.22956 |
| 151.94286 | -5.5653  | 4.20475 |
| 152.14    | -5.53827 | 4.18013 |
| 152.33714 | -5.51134 | 4.15569 |
| 152.53429 | -5.48451 | 4.13144 |
| 152.73143 | -5.45777 | 4.10736 |
| 152.92857 | -5.43113 | 4.08346 |
| 153.12572 | -5.40459 | 4.05974 |
| 153.32286 | -5.37814 | 4.0362  |
| 153.52    | -5.35178 | 4.01283 |
| 153.71715 | -5.32552 | 3.98963 |
| 153.91429 | -5.29936 | 3.96661 |
| 154.11143 | -5.27329 | 3.94375 |
| 154.30858 | -5.24731 | 3.92107 |
| 154.50571 | -5.22143 | 3.89855 |
| 154.70285 | -5.19564 | 3.87619 |
| 154.89999 | -5.16995 | 3.854   |
| 155.09714 | -5.14435 | 3.83197 |
| 155.29428 | -5.11884 | 3.8101  |
| 155.49142 | -5.09343 | 3.78839 |
| 155.68857 | -5.06811 | 3.76684 |

|           |          |         |
|-----------|----------|---------|
| 155.88571 | -5.04288 | 3.74544 |
| 156.08286 | -5.01774 | 3.7242  |
| 156.28    | -4.9927  | 3.70312 |
| 156.47714 | -4.96775 | 3.68218 |
| 156.67429 | -4.94289 | 3.6614  |
| 156.87143 | -4.91812 | 3.64076 |
| 157.06857 | -4.89344 | 3.62028 |
| 157.26572 | -4.86885 | 3.59994 |
| 157.46286 | -4.84435 | 3.57974 |
| 157.66    | -4.81994 | 3.55969 |
| 157.85715 | -4.79562 | 3.53979 |
| 158.05429 | -4.7714  | 3.52002 |
| 158.25143 | -4.74726 | 3.5004  |
| 158.44858 | -4.72321 | 3.48091 |
| 158.64572 | -4.69924 | 3.46157 |
| 158.84285 | -4.67537 | 3.44236 |
| 159.03999 | -4.65159 | 3.42329 |
| 159.23714 | -4.62789 | 3.40435 |
| 159.43428 | -4.60428 | 3.38554 |
| 159.63142 | -4.58076 | 3.36687 |
| 159.82857 | -4.55732 | 3.34832 |
| 160.02571 | -4.53397 | 3.32991 |
| 160.22285 | -4.51071 | 3.31163 |
| 160.42    | -4.48753 | 3.29347 |
| 160.61714 | -4.46444 | 3.27544 |
| 160.81429 | -4.44143 | 3.25754 |
| 161.01143 | -4.41851 | 3.23976 |
| 161.20857 | -4.39568 | 3.2221  |
| 161.40572 | -4.37293 | 3.20457 |
| 161.60286 | -4.35026 | 3.18715 |
| 161.8     | -4.32768 | 3.16986 |
| 161.99715 | -4.30518 | 3.15268 |
| 162.19429 | -4.28276 | 3.13563 |
| 162.39143 | -4.26043 | 3.11869 |
| 162.58858 | -4.23818 | 3.10187 |
| 162.78572 | -4.21601 | 3.08516 |
| 162.98286 | -4.19392 | 3.06857 |
| 163.17999 | -4.17192 | 3.05209 |
| 163.37714 | -4.15    | 3.03572 |
| 163.57428 | -4.12816 | 3.01947 |
| 163.77142 | -4.1064  | 3.00332 |
| 163.96857 | -4.08472 | 2.98729 |
| 164.16571 | -4.06312 | 2.97136 |
| 164.36285 | -4.0416  | 2.95554 |
| 164.56    | -4.02016 | 2.93983 |
| 164.75714 | -3.9988  | 2.92422 |
| 164.95428 | -3.97752 | 2.90871 |
| 165.15143 | -3.95631 | 2.89332 |
| 165.34857 | -3.93519 | 2.87802 |
| 165.54572 | -3.91415 | 2.86283 |
| 165.74286 | -3.89318 | 2.84774 |
| 165.94    | -3.87229 | 2.83275 |
| 166.13715 | -3.85147 | 2.81786 |

|           |          |         |
|-----------|----------|---------|
| 166.33429 | -3.83074 | 2.80306 |
| 166.53143 | -3.81008 | 2.78837 |
| 166.72858 | -3.78949 | 2.77377 |
| 166.92572 | -3.76899 | 2.75927 |
| 167.12286 | -3.74856 | 2.74487 |
| 167.32001 | -3.7282  | 2.73056 |
| 167.51714 | -3.70792 | 2.71635 |
| 167.71428 | -3.68771 | 2.70223 |
| 167.91142 | -3.66758 | 2.6882  |
| 168.10857 | -3.64753 | 2.67426 |
| 168.30571 | -3.62754 | 2.66042 |
| 168.50285 | -3.60763 | 2.64666 |
| 168.7     | -3.58779 | 2.633   |
| 168.89714 | -3.56803 | 2.61942 |
| 169.09428 | -3.54834 | 2.60593 |
| 169.29143 | -3.52872 | 2.59253 |
| 169.48857 | -3.50918 | 2.57922 |
| 169.68571 | -3.4897  | 2.56599 |
| 169.88286 | -3.4703  | 2.55285 |
| 170.08    | -3.45097 | 2.53979 |
| 170.27715 | -3.43171 | 2.52682 |
| 170.47429 | -3.41252 | 2.51393 |
| 170.67143 | -3.3934  | 2.50112 |
| 170.86858 | -3.37435 | 2.4884  |
| 171.06572 | -3.35537 | 2.47575 |
| 171.26286 | -3.33646 | 2.46319 |
| 171.46001 | -3.31762 | 2.45071 |
| 171.65715 | -3.29884 | 2.4383  |
| 171.85428 | -3.28014 | 2.42598 |
| 172.05142 | -3.26151 | 2.41373 |
| 172.24857 | -3.24294 | 2.40157 |
| 172.44571 | -3.22444 | 2.38947 |
| 172.64285 | -3.20601 | 2.37746 |
| 172.84    | -3.18765 | 2.36552 |
| 173.03714 | -3.16935 | 2.35366 |
| 173.23428 | -3.15112 | 2.34187 |
| 173.43143 | -3.13295 | 2.33015 |
| 173.62857 | -3.11485 | 2.31851 |
| 173.82571 | -3.09682 | 2.30694 |
| 174.02286 | -3.07886 | 2.29544 |
| 174.22    | -3.06095 | 2.28402 |
| 174.41714 | -3.04312 | 2.27267 |
| 174.61429 | -3.02534 | 2.26138 |
| 174.81143 | -3.00763 | 2.25017 |
| 175.00858 | -2.98999 | 2.23903 |
| 175.20572 | -2.97241 | 2.22795 |
| 175.40286 | -2.9549  | 2.21695 |
| 175.60001 | -2.93744 | 2.20601 |
| 175.79715 | -2.92005 | 2.19514 |
| 175.99429 | -2.90273 | 2.18433 |
| 176.19142 | -2.88546 | 2.1736  |
| 176.38857 | -2.86826 | 2.16293 |
| 176.58571 | -2.85112 | 2.15232 |



|           |          |         |
|-----------|----------|---------|
| 176.78285 | -2.83404 | 2.14178 |
| 176.98    | -2.81702 | 2.1313  |
| 177.17714 | -2.80007 | 2.12089 |
| 177.37428 | -2.78317 | 2.11054 |
| 177.57143 | -2.76634 | 2.10026 |
| 177.76857 | -2.74957 | 2.09003 |
| 177.96571 | -2.73285 | 2.07987 |
| 178.16286 | -2.7162  | 2.06977 |
| 178.36    | -2.6996  | 2.05973 |
| 178.55714 | -2.68307 | 2.04975 |
| 178.75429 | -2.66659 | 2.03983 |
| 178.95143 | -2.65018 | 2.02998 |
| 179.14857 | -2.63382 | 2.02018 |
| 179.34572 | -2.61752 | 2.01044 |
| 179.54286 | -2.60128 | 2.00075 |
| 179.74001 | -2.58509 | 1.99113 |
| 179.93715 | -2.56897 | 1.98156 |
| 180.13429 | -2.5529  | 1.97205 |
| 180.33144 | -2.53689 | 1.9626  |
| 180.52856 | -2.52093 | 1.9532  |
| 180.72571 | -2.50503 | 1.94386 |
| 180.92285 | -2.48919 | 1.93458 |
| 181.12    | -2.47341 | 1.92534 |
| 181.31714 | -2.45768 | 1.91617 |
| 181.51428 | -2.442   | 1.90705 |
| 181.71143 | -2.42638 | 1.89798 |
| 181.90857 | -2.41082 | 1.88896 |
| 182.10571 | -2.39531 | 1.88    |
| 182.30286 | -2.37986 | 1.87109 |
| 182.5     | -2.36446 | 1.86223 |
| 182.69714 | -2.34911 | 1.85343 |
| 182.89429 | -2.33382 | 1.84468 |
| 183.09143 | -2.31858 | 1.83597 |
| 183.28857 | -2.3034  | 1.82732 |
| 183.48572 | -2.28827 | 1.81872 |
| 183.68286 | -2.27319 | 1.81017 |
| 183.88    | -2.25816 | 1.80167 |
| 184.07715 | -2.24319 | 1.79321 |
| 184.27429 | -2.22827 | 1.78481 |
| 184.47144 | -2.2134  | 1.77645 |
| 184.66856 | -2.19859 | 1.76815 |
| 184.86571 | -2.18382 | 1.75989 |
| 185.06285 | -2.16911 | 1.75168 |
| 185.25999 | -2.15445 | 1.74351 |
| 185.45714 | -2.13984 | 1.73539 |
| 185.65428 | -2.12528 | 1.72732 |
| 185.85143 | -2.11077 | 1.7193  |
| 186.04857 | -2.09631 | 1.71132 |
| 186.24571 | -2.0819  | 1.70338 |
| 186.44286 | -2.06754 | 1.69549 |
| 186.64    | -2.05323 | 1.68765 |
| 186.83714 | -2.03897 | 1.67985 |
| 187.03429 | -2.02476 | 1.6721  |

|           |          |         |
|-----------|----------|---------|
| 187.23143 | -2.0106  | 1.66438 |
| 187.42857 | -1.99649 | 1.65672 |
| 187.62572 | -1.98242 | 1.64909 |
| 187.82286 | -1.96841 | 1.64151 |
| 188.02    | -1.95444 | 1.63397 |
| 188.21715 | -1.94052 | 1.62648 |
| 188.41429 | -1.92665 | 1.61902 |
| 188.61143 | -1.91283 | 1.61161 |
| 188.80858 | -1.89905 | 1.60424 |
| 189.00571 | -1.88532 | 1.59691 |
| 189.20285 | -1.87164 | 1.58962 |
| 189.39999 | -1.85801 | 1.58237 |
| 189.59714 | -1.84442 | 1.57517 |
| 189.79428 | -1.83087 | 1.568   |
| 189.99142 | -1.81738 | 1.56087 |
| 190.18857 | -1.80393 | 1.55378 |
| 190.38571 | -1.79052 | 1.54673 |
| 190.58286 | -1.77717 | 1.53972 |
| 190.78    | -1.76385 | 1.53275 |
| 190.97714 | -1.75058 | 1.52582 |
| 191.17429 | -1.73736 | 1.51893 |
| 191.37143 | -1.72418 | 1.51207 |
| 191.56857 | -1.71105 | 1.50525 |
| 191.76572 | -1.69796 | 1.49847 |
| 191.96286 | -1.68491 | 1.49172 |
| 192.16    | -1.67191 | 1.48502 |
| 192.35715 | -1.65895 | 1.47835 |
| 192.55429 | -1.64604 | 1.47171 |
| 192.75143 | -1.63317 | 1.46511 |
| 192.94858 | -1.62034 | 1.45855 |
| 193.14572 | -1.60756 | 1.45202 |
| 193.34285 | -1.59482 | 1.44553 |
| 193.53999 | -1.58212 | 1.43908 |
| 193.73714 | -1.56947 | 1.43265 |
| 193.93428 | -1.55685 | 1.42627 |
| 194.13142 | -1.54428 | 1.41992 |
| 194.32857 | -1.53175 | 1.4136  |
| 194.52571 | -1.51927 | 1.40731 |
| 194.72285 | -1.50682 | 1.40106 |
| 194.92    | -1.49442 | 1.39485 |
| 195.11714 | -1.48206 | 1.38866 |
| 195.31429 | -1.46973 | 1.38251 |
| 195.51143 | -1.45745 | 1.3764  |
| 195.70857 | -1.44521 | 1.37031 |
| 195.90572 | -1.43301 | 1.36426 |
| 196.10286 | -1.42086 | 1.35824 |
| 196.3     | -1.40874 | 1.35225 |
| 196.49715 | -1.39666 | 1.3463  |
| 196.69429 | -1.38462 | 1.34037 |
| 196.89143 | -1.37262 | 1.33448 |
| 197.08858 | -1.36066 | 1.32862 |
| 197.28572 | -1.34874 | 1.32279 |
| 197.48286 | -1.33686 | 1.31699 |

|           |          |         |
|-----------|----------|---------|
| 197.67999 | -1.32502 | 1.31122 |
| 197.87714 | -1.31322 | 1.30548 |
| 198.07428 | -1.30146 | 1.29977 |
| 198.27142 | -1.28973 | 1.29409 |
| 198.46857 | -1.27804 | 1.28844 |
| 198.66571 | -1.26639 | 1.28282 |
| 198.86285 | -1.25478 | 1.27723 |
| 199.06    | -1.24321 | 1.27167 |
| 199.25714 | -1.23168 | 1.26614 |
| 199.45428 | -1.22018 | 1.26063 |
| 199.65143 | -1.20872 | 1.25516 |
| 199.84857 | -1.1973  | 1.24971 |
| 200.04572 | -1.18591 | 1.24429 |
| 200.24286 | -1.17457 | 1.2389  |
| 200.44    | -1.16325 | 1.23354 |
| 200.63715 | -1.15198 | 1.22821 |
| 200.83429 | -1.14074 | 1.2229  |
| 201.03143 | -1.12954 | 1.21762 |
| 201.22858 | -1.11837 | 1.21237 |
| 201.42572 | -1.10724 | 1.20714 |
| 201.62286 | -1.09615 | 1.20195 |
| 201.82001 | -1.08509 | 1.19677 |
| 202.01714 | -1.07407 | 1.19163 |
| 202.21428 | -1.06309 | 1.18651 |
| 202.41142 | -1.05213 | 1.18142 |
| 202.60857 | -1.04122 | 1.17635 |
| 202.80571 | -1.03034 | 1.17131 |
| 203.00285 | -1.01949 | 1.1663  |
| 203.2     | -1.00868 | 1.16131 |
| 203.39714 | -0.9979  | 1.15634 |
| 203.59428 | -0.98716 | 1.1514  |
| 203.79143 | -0.97645 | 1.14649 |
| 203.98857 | -0.96578 | 1.1416  |
| 204.18571 | -0.95514 | 1.13673 |
| 204.38286 | -0.94453 | 1.13189 |
| 204.58    | -0.93396 | 1.12708 |
| 204.77715 | -0.92342 | 1.12229 |
| 204.97429 | -0.91292 | 1.11752 |
| 205.17143 | -0.90244 | 1.11278 |
| 205.36858 | -0.89201 | 1.10806 |
| 205.56572 | -0.8816  | 1.10336 |
| 205.76286 | -0.87123 | 1.09869 |
| 205.96001 | -0.86089 | 1.09404 |
| 206.15715 | -0.85058 | 1.08941 |
| 206.35428 | -0.84031 | 1.08481 |
| 206.55142 | -0.83006 | 1.08023 |
| 206.74857 | -0.81985 | 1.07568 |
| 206.94571 | -0.80967 | 1.07114 |
| 207.14285 | -0.79953 | 1.06663 |
| 207.34    | -0.78941 | 1.06214 |
| 207.53714 | -0.77933 | 1.05767 |
| 207.73428 | -0.76928 | 1.05323 |
| 207.93143 | -0.75926 | 1.0488  |

|           |          |         |
|-----------|----------|---------|
| 208.12857 | -0.74927 | 1.0444  |
| 208.32571 | -0.73932 | 1.04002 |
| 208.52286 | -0.72939 | 1.03567 |
| 208.72    | -0.7195  | 1.03133 |
| 208.91714 | -0.70963 | 1.02701 |
| 209.11429 | -0.6998  | 1.02272 |
| 209.31143 | -0.68999 | 1.01844 |
| 209.50858 | -0.68022 | 1.01419 |
| 209.70572 | -0.67048 | 1.00996 |
| 209.90286 | -0.66077 | 1.00575 |
| 210.10001 | -0.65109 | 1.00156 |
| 210.29715 | -0.64143 | 0.99739 |
| 210.49429 | -0.63181 | 0.99324 |
| 210.69142 | -0.62222 | 0.98911 |
| 210.88857 | -0.61266 | 0.985   |
| 211.08571 | -0.60312 | 0.98091 |
| 211.28285 | -0.59362 | 0.97684 |
| 211.48    | -0.58415 | 0.97279 |
| 211.67714 | -0.5747  | 0.96876 |
| 211.87428 | -0.56528 | 0.96475 |
| 212.07143 | -0.5559  | 0.96076 |
| 212.26857 | -0.54654 | 0.95678 |
| 212.46571 | -0.53721 | 0.95283 |
| 212.66286 | -0.5279  | 0.9489  |
| 212.86    | -0.51863 | 0.94498 |
| 213.05714 | -0.50939 | 0.94108 |
| 213.25429 | -0.50017 | 0.93721 |
| 213.45143 | -0.49098 | 0.93335 |
| 213.64857 | -0.48182 | 0.9295  |
| 213.84572 | -0.47269 | 0.92568 |
| 214.04286 | -0.46358 | 0.92188 |
| 214.24001 | -0.4545  | 0.91809 |
| 214.43715 | -0.44545 | 0.91432 |
| 214.63429 | -0.43643 | 0.91057 |
| 214.83144 | -0.42744 | 0.90684 |
| 215.02856 | -0.41847 | 0.90312 |
| 215.22571 | -0.40953 | 0.89942 |
| 215.42285 | -0.40061 | 0.89574 |
| 215.62    | -0.39173 | 0.89208 |
| 215.81714 | -0.38287 | 0.88843 |
| 216.01428 | -0.37403 | 0.8848  |
| 216.21143 | -0.36522 | 0.88119 |
| 216.40857 | -0.35644 | 0.8776  |
| 216.60571 | -0.34769 | 0.87402 |
| 216.80286 | -0.33896 | 0.87046 |
| 217       | -0.33026 | 0.86692 |
| 217.19714 | -0.32158 | 0.86339 |
| 217.39429 | -0.31293 | 0.85988 |
| 217.59143 | -0.30431 | 0.85638 |
| 217.78857 | -0.29571 | 0.8529  |
| 217.98572 | -0.28714 | 0.84944 |
| 218.18286 | -0.27859 | 0.84599 |
| 218.38    | -0.27007 | 0.84256 |

|           |          |         |
|-----------|----------|---------|
| 218.57715 | -0.26157 | 0.83915 |
| 218.77429 | -0.2531  | 0.83575 |
| 218.97144 | -0.24465 | 0.83237 |
| 219.16856 | -0.23623 | 0.829   |
| 219.36571 | -0.22784 | 0.82565 |
| 219.56285 | -0.21946 | 0.82231 |
| 219.75999 | -0.21112 | 0.81899 |
| 219.95714 | -0.2028  | 0.81569 |
| 220.15428 | -0.1945  | 0.8124  |
| 220.35143 | -0.18622 | 0.80912 |
| 220.54857 | -0.17798 | 0.80586 |
| 220.74571 | -0.16975 | 0.80262 |
| 220.94286 | -0.16155 | 0.79938 |
| 221.14    | -0.15337 | 0.79617 |
| 221.33714 | -0.14522 | 0.79297 |
| 221.53429 | -0.13709 | 0.78978 |
| 221.73143 | -0.12899 | 0.78661 |
| 221.92857 | -0.12091 | 0.78345 |
| 222.12572 | -0.11285 | 0.78031 |
| 222.32286 | -0.10482 | 0.77718 |
| 222.52    | -0.09681 | 0.77407 |
| 222.71715 | -0.08882 | 0.77097 |
| 222.91429 | -0.08086 | 0.76788 |
| 223.11143 | -0.07291 | 0.76481 |
| 223.30858 | -0.065   | 0.76175 |
| 223.50571 | -0.0571  | 0.7587  |
| 223.70285 | -0.04923 | 0.75567 |
| 223.89999 | -0.04138 | 0.75266 |
| 224.09714 | -0.03356 | 0.74965 |
| 224.29428 | -0.02575 | 0.74666 |
| 224.49142 | -0.01797 | 0.74369 |
| 224.68857 | -0.01021 | 0.74072 |
| 224.88571 | -0.00248 | 0.73777 |
| 225.08286 | 0.00524  | 0.73483 |
| 225.28    | 0.01293  | 0.73191 |
| 225.47714 | 0.0206   | 0.729   |
| 225.67429 | 0.02825  | 0.7261  |
| 225.87143 | 0.03587  | 0.72322 |
| 226.06857 | 0.04348  | 0.72035 |
| 226.26572 | 0.05106  | 0.71749 |
| 226.46286 | 0.05862  | 0.71464 |
| 226.66    | 0.06616  | 0.71181 |
| 226.85715 | 0.07368  | 0.70898 |
| 227.05429 | 0.08117  | 0.70618 |
| 227.25143 | 0.08865  | 0.70338 |
| 227.44858 | 0.0961   | 0.70059 |
| 227.64572 | 0.10353  | 0.69782 |
| 227.84285 | 0.11094  | 0.69506 |
| 228.03999 | 0.11833  | 0.69232 |
| 228.23714 | 0.1257   | 0.68958 |
| 228.43428 | 0.13305  | 0.68686 |
| 228.63142 | 0.14038  | 0.68415 |
| 228.82857 | 0.14768  | 0.68145 |

|           |         |         |
|-----------|---------|---------|
| 229.02571 | 0.15497 | 0.67876 |
| 229.22285 | 0.16223 | 0.67608 |
| 229.42    | 0.16948 | 0.67342 |
| 229.61714 | 0.1767  | 0.67077 |
| 229.81429 | 0.18391 | 0.66813 |
| 230.01143 | 0.19109 | 0.6655  |
| 230.20857 | 0.19825 | 0.66288 |
| 230.40572 | 0.2054  | 0.66027 |
| 230.60286 | 0.21252 | 0.65768 |
| 230.8     | 0.21962 | 0.65509 |
| 230.99715 | 0.22671 | 0.65252 |
| 231.19429 | 0.23377 | 0.64996 |
| 231.39143 | 0.24082 | 0.64741 |
| 231.58858 | 0.24784 | 0.64487 |
| 231.78572 | 0.25484 | 0.64234 |
| 231.98286 | 0.26183 | 0.63982 |
| 232.17999 | 0.2688  | 0.63732 |
| 232.37714 | 0.27574 | 0.63482 |
| 232.57428 | 0.28267 | 0.63234 |
| 232.77142 | 0.28958 | 0.62986 |
| 232.96857 | 0.29646 | 0.6274  |
| 233.16571 | 0.30333 | 0.62494 |
| 233.36285 | 0.31019 | 0.6225  |
| 233.56    | 0.31702 | 0.62007 |
| 233.75714 | 0.32383 | 0.61765 |
| 233.95428 | 0.33062 | 0.61524 |
| 234.15143 | 0.3374  | 0.61283 |
| 234.34857 | 0.34415 | 0.61044 |
| 234.54572 | 0.35089 | 0.60806 |
| 234.74286 | 0.35761 | 0.60569 |
| 234.94    | 0.36431 | 0.60333 |
| 235.13715 | 0.371   | 0.60098 |
| 235.33429 | 0.37766 | 0.59864 |
| 235.53143 | 0.38431 | 0.59631 |
| 235.72858 | 0.39093 | 0.59399 |
| 235.92572 | 0.39754 | 0.59168 |
| 236.12286 | 0.40413 | 0.58938 |
| 236.32001 | 0.41071 | 0.58709 |
| 236.51714 | 0.41726 | 0.5848  |
| 236.71428 | 0.4238  | 0.58253 |
| 236.91142 | 0.43032 | 0.58027 |
| 237.10857 | 0.43682 | 0.57802 |
| 237.30571 | 0.44331 | 0.57577 |
| 237.50285 | 0.44977 | 0.57354 |
| 237.7     | 0.45622 | 0.57131 |
| 237.89714 | 0.46265 | 0.5691  |
| 238.09428 | 0.46907 | 0.56689 |
| 238.29143 | 0.47546 | 0.5647  |
| 238.48857 | 0.48184 | 0.56251 |
| 238.68571 | 0.48821 | 0.56033 |
| 238.88286 | 0.49455 | 0.55816 |
| 239.08    | 0.50088 | 0.556   |
| 239.27715 | 0.50719 | 0.55385 |

|           |         |         |
|-----------|---------|---------|
| 239.47429 | 0.51349 | 0.55171 |
| 239.67143 | 0.51976 | 0.54957 |
| 239.86858 | 0.52602 | 0.54745 |
| 240.06572 | 0.53227 | 0.54533 |
| 240.26286 | 0.53849 | 0.54322 |
| 240.46001 | 0.5447  | 0.54113 |
| 240.65715 | 0.5509  | 0.53904 |
| 240.85428 | 0.55707 | 0.53695 |
| 241.05142 | 0.56323 | 0.53488 |
| 241.24857 | 0.56938 | 0.53282 |
| 241.44571 | 0.5755  | 0.53076 |
| 241.64285 | 0.58162 | 0.52872 |
| 241.84    | 0.58771 | 0.52668 |
| 242.03714 | 0.59379 | 0.52465 |
| 242.23428 | 0.59985 | 0.52262 |
| 242.43143 | 0.6059  | 0.52061 |
| 242.62857 | 0.61193 | 0.51861 |
| 242.82571 | 0.61794 | 0.51661 |
| 243.02286 | 0.62394 | 0.51462 |
| 243.22    | 0.62992 | 0.51264 |
| 243.41714 | 0.63589 | 0.51067 |
| 243.61429 | 0.64184 | 0.5087  |
| 243.81143 | 0.64778 | 0.50674 |
| 244.00858 | 0.6537  | 0.5048  |
| 244.20572 | 0.6596  | 0.50286 |
| 244.40286 | 0.66549 | 0.50092 |
| 244.60001 | 0.67136 | 0.499   |
| 244.79715 | 0.67722 | 0.49708 |
| 244.99429 | 0.68306 | 0.49517 |
| 245.19142 | 0.68889 | 0.49327 |
| 245.38857 | 0.6947  | 0.49138 |
| 245.58571 | 0.7005  | 0.48949 |
| 245.78285 | 0.70628 | 0.48761 |
| 245.98    | 0.71204 | 0.48574 |
| 246.17714 | 0.71779 | 0.48387 |
| 246.37428 | 0.72353 | 0.48202 |
| 246.57143 | 0.72925 | 0.48017 |
| 246.76857 | 0.73496 | 0.47833 |
| 246.96571 | 0.74065 | 0.4765  |
| 247.16286 | 0.74633 | 0.47467 |
| 247.36    | 0.75199 | 0.47285 |
| 247.55714 | 0.75763 | 0.47104 |
| 247.75429 | 0.76327 | 0.46923 |
| 247.95143 | 0.76888 | 0.46744 |
| 248.14857 | 0.77449 | 0.46565 |
| 248.34572 | 0.78008 | 0.46386 |
| 248.54286 | 0.78565 | 0.46209 |
| 248.74001 | 0.79121 | 0.46032 |
| 248.93715 | 0.79676 | 0.45856 |
| 249.13429 | 0.80229 | 0.4568  |
| 249.33144 | 0.80781 | 0.45505 |
| 249.52856 | 0.81331 | 0.45331 |
| 249.72571 | 0.8188  | 0.45158 |

|           |         |         |
|-----------|---------|---------|
| 249.92285 | 0.82427 | 0.44985 |
| 250.12    | 0.82973 | 0.44813 |
| 250.31714 | 0.83518 | 0.44642 |
| 250.51428 | 0.84061 | 0.44471 |
| 250.71143 | 0.84603 | 0.44301 |
| 250.90857 | 0.85144 | 0.44132 |
| 251.10571 | 0.85683 | 0.43963 |
| 251.30286 | 0.8622  | 0.43795 |
| 251.5     | 0.86757 | 0.43628 |
| 251.69714 | 0.87292 | 0.43461 |
| 251.89429 | 0.87825 | 0.43295 |
| 252.09143 | 0.88358 | 0.4313  |
| 252.28857 | 0.88889 | 0.42965 |
| 252.48572 | 0.89418 | 0.42801 |
| 252.68286 | 0.89946 | 0.42637 |
| 252.88    | 0.90473 | 0.42475 |
| 253.07715 | 0.90999 | 0.42312 |
| 253.27429 | 0.91523 | 0.42151 |
| 253.47144 | 0.92046 | 0.4199  |
| 253.66856 | 0.92568 | 0.4183  |
| 253.86571 | 0.93088 | 0.4167  |
| 254.06285 | 0.93607 | 0.41511 |
| 254.25999 | 0.94124 | 0.41353 |
| 254.45714 | 0.94641 | 0.41195 |
| 254.65428 | 0.95156 | 0.41038 |
| 254.85143 | 0.9567  | 0.40881 |
| 255.04857 | 0.96182 | 0.40725 |
| 255.24571 | 0.96693 | 0.4057  |
| 255.44286 | 0.97203 | 0.40415 |
| 255.64    | 0.97712 | 0.40261 |
| 255.83714 | 0.98219 | 0.40107 |
| 256.03427 | 0.98725 | 0.39954 |
| 256.23141 | 0.9923  | 0.39802 |
| 256.42856 | 0.99733 | 0.3965  |
| 256.6257  | 1.00236 | 0.39499 |
| 256.82285 | 1.00737 | 0.39348 |
| 257.01999 | 1.01237 | 0.39198 |
| 257.21713 | 1.01735 | 0.39049 |
| 257.41428 | 1.02232 | 0.389   |
| 257.61142 | 1.02729 | 0.38752 |
| 257.80856 | 1.03223 | 0.38604 |
| 258.00571 | 1.03717 | 0.38457 |
| 258.20285 | 1.04209 | 0.3831  |
| 258.39999 | 1.04701 | 0.38164 |
| 258.59714 | 1.05191 | 0.38018 |
| 258.79428 | 1.05679 | 0.37874 |
| 258.99142 | 1.06167 | 0.37729 |
| 259.18857 | 1.06653 | 0.37585 |
| 259.38571 | 1.07138 | 0.37442 |
| 259.58286 | 1.07622 | 0.37299 |
| 259.78    | 1.08105 | 0.37157 |
| 259.97714 | 1.08587 | 0.37015 |
| 260.17429 | 1.09067 | 0.36874 |



|           |         |         |
|-----------|---------|---------|
| 260.37143 | 1.09546 | 0.36734 |
| 260.56857 | 1.10024 | 0.36593 |
| 260.76572 | 1.10501 | 0.36454 |
| 260.96286 | 1.10977 | 0.36315 |
| 261.16    | 1.11451 | 0.36176 |
| 261.35715 | 1.11925 | 0.36038 |
| 261.55429 | 1.12397 | 0.35901 |
| 261.75143 | 1.12868 | 0.35764 |
| 261.94858 | 1.13338 | 0.35628 |
| 262.14572 | 1.13807 | 0.35492 |
| 262.34286 | 1.14274 | 0.35356 |
| 262.54001 | 1.14741 | 0.35221 |
| 262.73715 | 1.15206 | 0.35087 |
| 262.9343  | 1.1567  | 0.34953 |
| 263.13144 | 1.16134 | 0.3482  |
| 263.32858 | 1.16596 | 0.34687 |
| 263.52573 | 1.17056 | 0.34555 |
| 263.72287 | 1.17516 | 0.34423 |
| 263.92001 | 1.17975 | 0.34291 |
| 264.11716 | 1.18432 | 0.3416  |
| 264.3143  | 1.18889 | 0.3403  |
| 264.51141 | 1.19344 | 0.339   |
| 264.70856 | 1.19798 | 0.33771 |
| 264.9057  | 1.20251 | 0.33642 |
| 265.10284 | 1.20703 | 0.33513 |
| 265.29999 | 1.21154 | 0.33385 |
| 265.49713 | 1.21604 | 0.33258 |
| 265.69427 | 1.22053 | 0.33131 |
| 265.89142 | 1.22501 | 0.33004 |
| 266.08856 | 1.22947 | 0.32878 |
| 266.28571 | 1.23393 | 0.32752 |
| 266.48285 | 1.23838 | 0.32627 |
| 266.67999 | 1.24281 | 0.32502 |
| 266.87714 | 1.24723 | 0.32378 |
| 267.07428 | 1.25165 | 0.32254 |
| 267.27142 | 1.25605 | 0.32131 |
| 267.46857 | 1.26044 | 0.32008 |
| 267.66571 | 1.26483 | 0.31886 |
| 267.86285 | 1.2692  | 0.31764 |
| 268.06    | 1.27356 | 0.31642 |
| 268.25714 | 1.27791 | 0.31521 |
| 268.45428 | 1.28225 | 0.314   |
| 268.65143 | 1.28658 | 0.3128  |
| 268.84857 | 1.2909  | 0.3116  |
| 269.04572 | 1.29521 | 0.31041 |
| 269.24286 | 1.29951 | 0.30922 |
| 269.44    | 1.3038  | 0.30804 |
| 269.63715 | 1.30808 | 0.30686 |
| 269.83429 | 1.31235 | 0.30568 |
| 270.03143 | 1.31661 | 0.30451 |
| 270.22858 | 1.32085 | 0.30334 |
| 270.42572 | 1.32509 | 0.30218 |
| 270.62286 | 1.32932 | 0.30102 |

|           |         |         |
|-----------|---------|---------|
| 270.82001 | 1.33354 | 0.29986 |
| 271.01715 | 1.33775 | 0.29871 |
| 271.21429 | 1.34195 | 0.29757 |
| 271.41144 | 1.34614 | 0.29643 |
| 271.60858 | 1.35032 | 0.29529 |
| 271.80573 | 1.35449 | 0.29415 |
| 272.00287 | 1.35865 | 0.29302 |
| 272.20001 | 1.3628  | 0.2919  |
| 272.39716 | 1.36694 | 0.29078 |
| 272.5943  | 1.37107 | 0.28966 |
| 272.79144 | 1.37519 | 0.28854 |
| 272.98859 | 1.3793  | 0.28744 |
| 273.1857  | 1.38341 | 0.28633 |
| 273.38284 | 1.3875  | 0.28523 |
| 273.57999 | 1.39158 | 0.28413 |
| 273.77713 | 1.39566 | 0.28304 |
| 273.97427 | 1.39972 | 0.28195 |
| 274.17142 | 1.40378 | 0.28086 |
| 274.36856 | 1.40782 | 0.27978 |
| 274.5657  | 1.41186 | 0.2787  |
| 274.76285 | 1.41588 | 0.27763 |
| 274.95999 | 1.4199  | 0.27656 |
| 275.15714 | 1.42391 | 0.27549 |
| 275.35428 | 1.42791 | 0.27443 |
| 275.55142 | 1.4319  | 0.27337 |
| 275.74857 | 1.43588 | 0.27231 |
| 275.94571 | 1.43985 | 0.27126 |
| 276.14285 | 1.44381 | 0.27021 |
| 276.34    | 1.44777 | 0.26917 |
| 276.53714 | 1.45171 | 0.26813 |
| 276.73428 | 1.45565 | 0.26709 |
| 276.93143 | 1.45957 | 0.26606 |
| 277.12857 | 1.46349 | 0.26503 |
| 277.32571 | 1.4674  | 0.26401 |
| 277.52286 | 1.4713  | 0.26298 |
| 277.72    | 1.47519 | 0.26197 |
| 277.91714 | 1.47907 | 0.26095 |
| 278.11429 | 1.48294 | 0.25994 |
| 278.31143 | 1.48681 | 0.25893 |
| 278.50858 | 1.49066 | 0.25793 |
| 278.70572 | 1.49451 | 0.25693 |
| 278.90286 | 1.49834 | 0.25593 |
| 279.10001 | 1.50217 | 0.25494 |
| 279.29715 | 1.50599 | 0.25395 |
| 279.49429 | 1.5098  | 0.25296 |
| 279.69144 | 1.51361 | 0.25198 |
| 279.88858 | 1.5174  | 0.251   |
| 280.08572 | 1.52119 | 0.25002 |
| 280.28287 | 1.52496 | 0.24905 |
| 280.48001 | 1.52873 | 0.24808 |
| 280.67715 | 1.53249 | 0.24712 |
| 280.8743  | 1.53624 | 0.24615 |
| 281.07144 | 1.53999 | 0.2452  |

|           |         |         |
|-----------|---------|---------|
| 281.26859 | 1.54372 | 0.24424 |
| 281.46573 | 1.54745 | 0.24329 |
| 281.66287 | 1.55116 | 0.24234 |
| 281.85999 | 1.55487 | 0.24139 |
| 282.05713 | 1.55858 | 0.24045 |
| 282.25427 | 1.56227 | 0.23951 |
| 282.45142 | 1.56595 | 0.23858 |
| 282.64856 | 1.56963 | 0.23764 |
| 282.8457  | 1.5733  | 0.23671 |
| 283.04285 | 1.57696 | 0.23579 |
| 283.23999 | 1.58061 | 0.23486 |
| 283.43713 | 1.58425 | 0.23395 |
| 283.63428 | 1.58789 | 0.23303 |
| 283.83142 | 1.59151 | 0.23212 |
| 284.02856 | 1.59513 | 0.23121 |
| 284.22571 | 1.59875 | 0.2303  |
| 284.42285 | 1.60235 | 0.22939 |
| 284.62    | 1.60594 | 0.22849 |
| 284.81714 | 1.60953 | 0.2276  |
| 285.01428 | 1.61311 | 0.2267  |
| 285.21143 | 1.61668 | 0.22581 |
| 285.40857 | 1.62024 | 0.22492 |
| 285.60571 | 1.6238  | 0.22404 |
| 285.80286 | 1.62735 | 0.22315 |
| 286       | 1.63089 | 0.22228 |
| 286.19714 | 1.63442 | 0.2214  |
| 286.39429 | 1.63794 | 0.22053 |
| 286.59143 | 1.64146 | 0.21966 |
| 286.78857 | 1.64497 | 0.21879 |
| 286.98572 | 1.64847 | 0.21792 |
| 287.18286 | 1.65196 | 0.21706 |
| 287.38    | 1.65545 | 0.2162  |
| 287.57715 | 1.65893 | 0.21535 |
| 287.77429 | 1.6624  | 0.2145  |
| 287.97144 | 1.66586 | 0.21365 |
| 288.16858 | 1.66931 | 0.2128  |
| 288.36572 | 1.67276 | 0.21196 |
| 288.56287 | 1.6762  | 0.21112 |
| 288.76001 | 1.67963 | 0.21028 |
| 288.95715 | 1.68306 | 0.20944 |
| 289.1543  | 1.68647 | 0.20861 |
| 289.35144 | 1.68988 | 0.20778 |
| 289.54858 | 1.69329 | 0.20695 |
| 289.74573 | 1.69668 | 0.20613 |
| 289.94287 | 1.70007 | 0.20531 |
| 290.14001 | 1.70345 | 0.20449 |
| 290.33713 | 1.70682 | 0.20368 |
| 290.53427 | 1.71019 | 0.20286 |
| 290.73141 | 1.71355 | 0.20205 |
| 290.92856 | 1.7169  | 0.20125 |
| 291.1257  | 1.72024 | 0.20044 |
| 291.32285 | 1.72358 | 0.19964 |
| 291.51999 | 1.72691 | 0.19884 |

|           |         |         |
|-----------|---------|---------|
| 291.71713 | 1.73023 | 0.19804 |
| 291.91428 | 1.73354 | 0.19725 |
| 292.11142 | 1.73685 | 0.19646 |
| 292.30856 | 1.74015 | 0.19567 |
| 292.50571 | 1.74345 | 0.19489 |
| 292.70285 | 1.74673 | 0.1941  |
| 292.89999 | 1.75001 | 0.19332 |
| 293.09714 | 1.75328 | 0.19254 |
| 293.29428 | 1.75655 | 0.19177 |
| 293.49142 | 1.75981 | 0.191   |
| 293.68857 | 1.76306 | 0.19023 |
| 293.88571 | 1.7663  | 0.18946 |
| 294.08286 | 1.76954 | 0.18869 |
| 294.28    | 1.77277 | 0.18793 |
| 294.47714 | 1.77599 | 0.18717 |
| 294.67429 | 1.77921 | 0.18642 |
| 294.87143 | 1.78242 | 0.18566 |
| 295.06857 | 1.78562 | 0.18491 |
| 295.26572 | 1.78882 | 0.18416 |
| 295.46286 | 1.79201 | 0.18341 |
| 295.66    | 1.79519 | 0.18267 |
| 295.85715 | 1.79837 | 0.18193 |
| 296.05429 | 1.80154 | 0.18119 |
| 296.25143 | 1.8047  | 0.18045 |
| 296.44858 | 1.80785 | 0.17971 |
| 296.64572 | 1.811   | 0.17898 |
| 296.84286 | 1.81414 | 0.17825 |
| 297.04001 | 1.81728 | 0.17752 |
| 297.23715 | 1.82041 | 0.1768  |
| 297.4343  | 1.82353 | 0.17608 |
| 297.63144 | 1.82665 | 0.17536 |
| 297.82858 | 1.82975 | 0.17464 |
| 298.02573 | 1.83286 | 0.17392 |
| 298.22287 | 1.83595 | 0.17321 |
| 298.42001 | 1.83904 | 0.1725  |
| 298.61716 | 1.84212 | 0.17179 |
| 298.8143  | 1.8452  | 0.17108 |
| 299.01141 | 1.84827 | 0.17038 |
| 299.20856 | 1.85133 | 0.16968 |
| 299.4057  | 1.85439 | 0.16898 |
| 299.60284 | 1.85744 | 0.16828 |
| 299.79999 | 1.86049 | 0.16759 |
| 299.99713 | 1.86352 | 0.1669  |
