# Supplementary material for: Optical phonons in methylammonium lead halide perovskites and implications for charge transport
Source: Royal Society of Chemistry journal article supplement (doi:10.1039/c6mh00275g), 2016-01-01
Supplement: c6mh00275g3.pdf [file c6mh00275g3.pdf]

| wavenumber<br>[cm <sup>-1</sup> ] | Re(epsilon) | Im(epsilon) |
|-----------------------------------|-------------|-------------|
| 10                                | 33.95546    | 1.78035     |
| 10.16857                          | 34.01199    | 1.81905     |
| 10.33714                          | 34.06974    | 1.85827     |
| 10.50571                          | 34.12875    | 1.89801     |
| 10.67429                          | 34.18904    | 1.9383      |
| 10.84286                          | 34.2506     | 1.97916     |
| 11.01143                          | 34.31348    | 2.02061     |
| 11.18                             | 34.37767    | 2.06265     |
| 11.34857                          | 34.44322    | 2.10532     |
| 11.51714                          | 34.51012    | 2.14862     |
| 11.68571                          | 34.57842    | 2.19259     |
| 11.85429                          | 34.64812    | 2.23724     |
| 12.02286                          | 34.71924    | 2.28259     |
| 12.19143                          | 34.79182    | 2.32867     |
| 12.36                             | 34.86587    | 2.3755      |
| 12.52857                          | 34.94143    | 2.42311     |
| 12.69714                          | 35.01849    | 2.47151     |
| 12.86571                          | 35.09711    | 2.52074     |
| 13.03429                          | 35.1773     | 2.57082     |
| 13.20286                          | 35.25909    | 2.62179     |
| 13.37143                          | 35.34251    | 2.67366     |
| 13.54                             | 35.42758    | 2.72647     |
| 13.70857                          | 35.51435    | 2.78026     |
| 13.87714                          | 35.60281    | 2.83504     |
| 14.04571                          | 35.69303    | 2.89087     |
| 14.21429                          | 35.78502    | 2.94777     |
| 14.38286                          | 35.87882    | 3.00578     |
| 14.55143                          | 35.97446    | 3.06494     |
| 14.72                             | 36.07198    | 3.12529     |
| 14.88857                          | 36.17142    | 3.18687     |
| 15.05714                          | 36.27279    | 3.24971     |
| 15.22571                          | 36.37616    | 3.31388     |
| 15.39429                          | 36.48155    | 3.37942     |
| 15.56286                          | 36.58901    | 3.44637     |
| 15.73143                          | 36.69857    | 3.51478     |
| 15.9                              | 36.81027    | 3.58471     |
| 16.06857                          | 36.92417    | 3.65622     |
| 16.23714                          | 37.04031    | 3.72936     |
| 16.40571                          | 37.15872    | 3.8042      |
| 16.57429                          | 37.27946    | 3.88079     |
| 16.74286                          | 37.40258    | 3.95921     |
| 16.91143                          | 37.52812    | 4.03952     |
| 17.08                             | 37.65614    | 4.1218      |
| 17.24857                          | 37.78669    | 4.20612     |
| 17.41714                          | 37.91982    | 4.29257     |
| 17.58571                          | 38.0556     | 4.38123     |
| 17.75429                          | 38.19405    | 4.47218     |
| 17.92286                          | 38.33527    | 4.56553     |
| 18.09143                          | 38.47931    | 4.66136     |
| 18.26                             | 38.62621    | 4.75978     |
| 18.42857                          | 38.77606    | 4.86089     |

|          |          |          |
|----------|----------|----------|
| 18.59714 | 38.9289  | 4.96482  |
| 18.76571 | 39.08482 | 5.07167  |
| 18.93429 | 39.24387 | 5.18158  |
| 19.10286 | 39.40613 | 5.29467  |
| 19.27143 | 39.57166 | 5.41109  |
| 19.44    | 39.74054 | 5.53097  |
| 19.60857 | 39.91284 | 5.65448  |
| 19.77714 | 40.08864 | 5.78177  |
| 19.94571 | 40.26802 | 5.91302  |
| 20.11429 | 40.45103 | 6.0484   |
| 20.28286 | 40.63779 | 6.18811  |
| 20.45143 | 40.82837 | 6.33235  |
| 20.62    | 41.02282 | 6.48134  |
| 20.78857 | 41.22125 | 6.63529  |
| 20.95714 | 41.42374 | 6.79445  |
| 21.12571 | 41.63035 | 6.95907  |
| 21.29428 | 41.84119 | 7.12941  |
| 21.46286 | 42.05634 | 7.30577  |
| 21.63143 | 42.27586 | 7.48844  |
| 21.8     | 42.49983 | 7.67774  |
| 21.96857 | 42.72835 | 7.87401  |
| 22.13714 | 42.96148 | 8.07761  |
| 22.30571 | 43.1993  | 8.28892  |
| 22.47429 | 43.44187 | 8.50834  |
| 22.64286 | 43.68925 | 8.73631  |
| 22.81143 | 43.94151 | 8.97329  |
| 22.98    | 44.19869 | 9.21976  |
| 23.14857 | 44.46083 | 9.47623  |
| 23.31714 | 44.72796 | 9.74327  |
| 23.48571 | 45.00009 | 10.02146 |
| 23.65429 | 45.27723 | 10.31143 |
| 23.82286 | 45.55935 | 10.61383 |
| 23.99143 | 45.84644 | 10.92939 |
| 24.16    | 46.13842 | 11.25886 |
| 24.32857 | 46.43521 | 11.60304 |
| 24.49714 | 46.73669 | 11.96279 |
| 24.66571 | 47.04269 | 12.33902 |
| 24.83429 | 47.35303 | 12.73271 |
| 25.00286 | 47.66747 | 13.14489 |
| 25.17143 | 47.98568 | 13.57666 |
| 25.34    | 48.3073  | 14.0292  |
| 25.50857 | 48.6319  | 14.50374 |
| 25.67714 | 48.95895 | 15.0016  |
| 25.84571 | 49.28781 | 15.52418 |
| 26.01429 | 49.61776 | 16.07295 |
| 26.18286 | 49.94793 | 16.64948 |
| 26.35143 | 50.27732 | 17.2554  |
| 26.52    | 50.60476 | 17.89243 |
| 26.68857 | 50.92889 | 18.56239 |
| 26.85714 | 51.24815 | 19.26714 |
| 27.02571 | 51.56073 | 20.00863 |
| 27.19429 | 51.86456 | 20.78886 |
| 27.36286 | 52.15728 | 21.60987 |

|          |          |          |
|----------|----------|----------|
| 27.53143 | 52.43614 | 22.47372 |
| 27.7     | 52.69809 | 23.3825  |
| 27.86857 | 52.93961 | 24.33821 |
| 28.03714 | 53.15674 | 25.34281 |
| 28.20572 | 53.345   | 26.3981  |
| 28.37429 | 53.49939 | 27.5057  |
| 28.54286 | 53.61431 | 28.66695 |
| 28.71143 | 53.68351 | 29.88282 |
| 28.88    | 53.70014 | 31.15377 |
| 29.04857 | 53.65664 | 32.47964 |
| 29.21714 | 53.5448  | 33.85954 |
| 29.38571 | 53.35582 | 35.29156 |
| 29.55429 | 53.08027 | 36.77269 |
| 29.72286 | 52.7083  | 38.29858 |
| 29.89143 | 52.22972 | 39.86329 |
| 30.06    | 51.63425 | 41.45911 |
| 30.22857 | 50.91181 | 43.07641 |
| 30.39714 | 50.05281 | 44.70338 |
| 30.56571 | 49.04864 | 46.32599 |
| 30.73429 | 47.89212 | 47.92797 |
| 30.90286 | 46.57812 | 49.49089 |
| 31.07143 | 45.10402 | 50.99437 |
| 31.24    | 43.4704  | 52.41647 |
| 31.40857 | 41.68144 | 53.73428 |
| 31.57714 | 39.74544 | 54.92458 |
| 31.74571 | 37.675   | 55.96474 |
| 31.91429 | 35.48704 | 56.83371 |
| 32.08286 | 33.2026  | 57.51299 |
| 32.25143 | 30.84643 | 57.98759 |
| 32.42    | 28.44591 | 58.24694 |
| 32.58857 | 26.03039 | 58.28541 |
| 32.75714 | 23.62991 | 58.10273 |
| 32.92571 | 21.27397 | 57.704   |
| 33.09428 | 18.99039 | 57.09935 |
| 33.26286 | 16.80427 | 56.30344 |
| 33.43143 | 14.7372  | 55.33461 |
| 33.6     | 12.80668 | 54.21391 |
| 33.76857 | 11.02582 | 52.96409 |
| 33.93714 | 9.4034   | 51.60865 |
| 34.10571 | 7.94399  | 50.17091 |
| 34.27428 | 6.64841  | 48.67323 |
| 34.44286 | 5.51423  | 47.13646 |
| 34.61143 | 4.53634  | 45.57955 |
| 34.78    | 3.7075   | 44.01921 |
| 34.94857 | 3.01898  | 42.46989 |
| 35.11714 | 2.46101  | 40.94375 |
| 35.28571 | 2.02324  | 39.45076 |
| 35.45428 | 1.69512  | 37.99883 |
| 35.62286 | 1.4662   | 36.5941  |
| 35.79143 | 1.32632  | 35.24105 |
| 35.96    | 1.26581  | 33.94276 |
| 36.12857 | 1.27557  | 32.70116 |
| 36.29714 | 1.34718  | 31.51718 |

|          |          |          |
|----------|----------|----------|
| 36.46571 | 1.47287  | 30.39092 |
| 36.63428 | 1.64558  | 29.32188 |
| 36.80286 | 1.85892  | 28.30903 |
| 36.97143 | 2.10715  | 27.35096 |
| 37.14    | 2.38513  | 26.446   |
| 37.30857 | 2.68829  | 25.59223 |
| 37.47714 | 3.0126   | 24.78765 |
| 37.64571 | 3.35448  | 24.03015 |
| 37.81429 | 3.71079  | 23.31759 |
| 37.98286 | 4.07879  | 22.64785 |
| 38.15143 | 4.45608  | 22.01882 |
| 38.32    | 4.84056  | 21.42844 |
| 38.48857 | 5.23044  | 20.87473 |
| 38.65714 | 5.62413  | 20.35577 |
| 38.82571 | 6.02028  | 19.86971 |
| 38.99429 | 6.41774  | 19.41483 |
| 39.16286 | 6.8155   | 18.98944 |
| 39.33143 | 7.21271  | 18.59198 |
| 39.5     | 7.60866  | 18.22096 |
| 39.66857 | 8.00273  | 17.87499 |
| 39.83714 | 8.39441  | 17.55275 |
| 40.00571 | 8.78329  | 17.25299 |
| 40.17429 | 9.16899  | 16.97457 |
| 40.34286 | 9.55125  | 16.7164  |
| 40.51143 | 9.92981  | 16.47746 |
| 40.68    | 10.30452 | 16.2568  |
| 40.84857 | 10.6752  | 16.05353 |
| 41.01714 | 11.04178 | 15.86683 |
| 41.18571 | 11.40416 | 15.69593 |
| 41.35429 | 11.76229 | 15.54011 |
| 41.52286 | 12.11616 | 15.3987  |
| 41.69143 | 12.46576 | 15.27108 |
| 41.86    | 12.81108 | 15.15666 |
| 42.02857 | 13.15215 | 15.0549  |
| 42.19714 | 13.48901 | 14.96531 |
| 42.36572 | 13.8217  | 14.88741 |
| 42.53429 | 14.15026 | 14.82077 |
| 42.70286 | 14.47475 | 14.76501 |
| 42.87143 | 14.79522 | 14.71973 |
| 43.04    | 15.11174 | 14.68459 |
| 43.20857 | 15.42438 | 14.65929 |
| 43.37714 | 15.7332  | 14.64352 |
| 43.54572 | 16.03826 | 14.63702 |
| 43.71429 | 16.33963 | 14.63953 |
| 43.88286 | 16.63738 | 14.65083 |
| 44.05143 | 16.93157 | 14.67071 |
| 44.22    | 17.22225 | 14.69897 |
| 44.38857 | 17.5095  | 14.73543 |
| 44.55714 | 17.79335 | 14.77995 |
| 44.72572 | 18.07388 | 14.83237 |
| 44.89429 | 18.35113 | 14.89257 |
| 45.06286 | 18.62514 | 14.96043 |
| 45.23143 | 18.89596 | 15.03584 |

|          |          |          |
|----------|----------|----------|
| 45.4     | 19.16362 | 15.11872 |
| 45.56857 | 19.42817 | 15.20898 |
| 45.73714 | 19.68961 | 15.30655 |
| 45.90572 | 19.94799 | 15.41139 |
| 46.07429 | 20.20332 | 15.52342 |
| 46.24286 | 20.45561 | 15.64262 |
| 46.41143 | 20.70488 | 15.76896 |
| 46.58    | 20.95112 | 15.9024  |
| 46.74857 | 21.19432 | 16.04295 |
| 46.91714 | 21.43449 | 16.19058 |
| 47.08571 | 21.67161 | 16.3453  |
| 47.25428 | 21.90565 | 16.50712 |
| 47.42286 | 22.13658 | 16.67605 |
| 47.59143 | 22.36437 | 16.8521  |
| 47.76    | 22.58897 | 17.03531 |
| 47.92857 | 22.81033 | 17.22569 |
| 48.09714 | 23.0284  | 17.42329 |
| 48.26571 | 23.24311 | 17.62815 |
| 48.43428 | 23.45439 | 17.84031 |
| 48.60286 | 23.66214 | 18.05982 |
| 48.77143 | 23.86628 | 18.28673 |
| 48.94    | 24.06671 | 18.52109 |
| 49.10857 | 24.26332 | 18.76297 |
| 49.27714 | 24.45598 | 19.01241 |
| 49.44571 | 24.64458 | 19.2695  |
| 49.61428 | 24.82897 | 19.53428 |
| 49.78286 | 25.00899 | 19.80681 |
| 49.95143 | 25.1845  | 20.08718 |
| 50.12    | 25.3553  | 20.37544 |
| 50.28857 | 25.52124 | 20.67166 |
| 50.45714 | 25.6821  | 20.9759  |
| 50.62571 | 25.83768 | 21.28823 |
| 50.79428 | 25.98776 | 21.6087  |
| 50.96286 | 26.1321  | 21.93737 |
| 51.13143 | 26.27047 | 22.2743  |
| 51.3     | 26.4026  | 22.61953 |
| 51.46857 | 26.52821 | 22.97311 |
| 51.63714 | 26.64703 | 23.33508 |
| 51.80571 | 26.75875 | 23.70546 |
| 51.97429 | 26.86305 | 24.08428 |
| 52.14286 | 26.95961 | 24.47156 |
| 52.31143 | 27.04808 | 24.86729 |
| 52.48    | 27.1281  | 25.27148 |
| 52.64857 | 27.1993  | 25.68409 |
| 52.81714 | 27.26128 | 26.10509 |
| 52.98571 | 27.31364 | 26.53444 |
| 53.15429 | 27.35597 | 26.97206 |
| 53.32286 | 27.38784 | 27.41789 |
| 53.49143 | 27.40879 | 27.8718  |
| 53.66    | 27.41838 | 28.33368 |
| 53.82857 | 27.41612 | 28.80338 |
| 53.99714 | 27.40153 | 29.28073 |
| 54.16571 | 27.37413 | 29.76552 |

|          |          |          |
|----------|----------|----------|
| 54.33429 | 27.3334  | 30.25754 |
| 54.50286 | 27.27882 | 30.75653 |
| 54.67143 | 27.20988 | 31.26219 |
| 54.84    | 27.12606 | 31.77423 |
| 55.00857 | 27.02682 | 32.29226 |
| 55.17714 | 26.91162 | 32.81592 |
| 55.34571 | 26.77993 | 33.34476 |
| 55.51429 | 26.63122 | 33.87831 |
| 55.68286 | 26.46496 | 34.41609 |
| 55.85143 | 26.28063 | 34.95752 |
| 56.02    | 26.07772 | 35.50201 |
| 56.18857 | 25.85574 | 36.04892 |
| 56.35714 | 25.6142  | 36.59756 |
| 56.52571 | 25.35266 | 37.14722 |
| 56.69429 | 25.07068 | 37.6971  |
| 56.86286 | 24.76785 | 38.24639 |
| 57.03143 | 24.44381 | 38.79421 |
| 57.2     | 24.09821 | 39.33965 |
| 57.36857 | 23.73078 | 39.88176 |
| 57.53714 | 23.34127 | 40.41953 |
| 57.70572 | 22.92949 | 40.95193 |
| 57.87429 | 22.49529 | 41.47788 |
| 58.04286 | 22.03861 | 41.99627 |
| 58.21143 | 21.55945 | 42.50596 |
| 58.38    | 21.05784 | 43.00578 |
| 58.54857 | 20.53392 | 43.49454 |
| 58.71714 | 19.9879  | 43.97103 |
| 58.88572 | 19.42008 | 44.43405 |
| 59.05429 | 18.83081 | 44.88235 |
| 59.22286 | 18.22055 | 45.31474 |
| 59.39143 | 17.58984 | 45.73    |
| 59.56    | 16.93931 | 46.12691 |
| 59.72857 | 16.26969 | 46.50432 |
| 59.89714 | 15.58176 | 46.8611  |
| 60.06572 | 14.87643 | 47.19614 |
| 60.23429 | 14.15466 | 47.50837 |
| 60.40286 | 13.41753 | 47.79681 |
| 60.57143 | 12.66614 | 48.06051 |
| 60.74    | 11.90171 | 48.29861 |
| 60.90857 | 11.12552 | 48.51032 |
| 61.07714 | 10.3389  | 48.69493 |
| 61.24572 | 9.54324  | 48.85182 |
| 61.41429 | 8.73998  | 48.98047 |
| 61.58286 | 7.93058  | 49.08044 |
| 61.75143 | 7.11659  | 49.15142 |
| 61.92    | 6.2995   | 49.19319 |
| 62.08857 | 5.48085  | 49.20562 |
| 62.25714 | 4.6622   | 49.18872 |
| 62.42571 | 3.8451   | 49.1426  |
| 62.59428 | 3.03105  | 49.06742 |
| 62.76286 | 2.22158  | 48.96355 |
| 62.93143 | 1.41813  | 48.83135 |
| 63.1     | 0.62214  | 48.67136 |

|          |           |          |
|----------|-----------|----------|
| 63.26857 | -0.16501  | 48.48417 |
| 63.43714 | -0.942    | 48.27046 |
| 63.60571 | -1.70756  | 48.03101 |
| 63.77428 | -2.46051  | 47.76664 |
| 63.94286 | -3.19973  | 47.47828 |
| 64.11143 | -3.92417  | 47.16688 |
| 64.28    | -4.63287  | 46.83348 |
| 64.44857 | -5.32495  | 46.47912 |
| 64.61714 | -5.99963  | 46.10493 |
| 64.78571 | -6.65619  | 45.71203 |
| 64.95428 | -7.294    | 45.30157 |
| 65.12286 | -7.91254  | 44.87473 |
| 65.29143 | -8.51135  | 44.43268 |
| 65.46    | -9.09006  | 43.97659 |
| 65.62857 | -9.64839  | 43.50764 |
| 65.79714 | -10.18611 | 43.027   |
| 65.96571 | -10.70309 | 42.53579 |
| 66.13428 | -11.19926 | 42.03515 |
| 66.30286 | -11.67462 | 41.52617 |
| 66.47143 | -12.12924 | 41.00993 |
| 66.64    | -12.56322 | 40.48745 |
| 66.80857 | -12.97675 | 39.95973 |
| 66.97714 | -13.37006 | 39.42774 |
| 67.14571 | -13.74339 | 38.89239 |
| 67.31429 | -14.09707 | 38.35456 |
| 67.48286 | -14.43144 | 37.81509 |
| 67.65143 | -14.74688 | 37.27478 |
| 67.82    | -15.04379 | 36.73435 |
| 67.98857 | -15.32261 | 36.19454 |
| 68.15714 | -15.58379 | 35.65598 |
| 68.32571 | -15.8278  | 35.1193  |
| 68.49429 | -16.05512 | 34.58508 |
| 68.66286 | -16.26625 | 34.05385 |
| 68.83143 | -16.46169 | 33.52609 |
| 69       | -16.64194 | 33.00228 |
| 69.16857 | -16.80753 | 32.48281 |
| 69.33714 | -16.95896 | 31.96807 |
| 69.50571 | -17.09675 | 31.4584  |
| 69.67429 | -17.22141 | 30.95412 |
| 69.84286 | -17.33342 | 30.4555  |
| 70.01143 | -17.43331 | 29.96279 |
| 70.18    | -17.52156 | 29.47621 |
| 70.34857 | -17.59866 | 28.99595 |
| 70.51714 | -17.66506 | 28.52218 |
| 70.68571 | -17.72125 | 28.05504 |
| 70.85429 | -17.76767 | 27.59465 |
| 71.02286 | -17.80477 | 27.14112 |
| 71.19143 | -17.83298 | 26.69452 |
| 71.36    | -17.85271 | 26.25491 |
| 71.52857 | -17.86437 | 25.82234 |
| 71.69714 | -17.86835 | 25.39685 |
| 71.86572 | -17.86503 | 24.97843 |
| 72.03429 | -17.85479 | 24.56709 |

|          |           |          |
|----------|-----------|----------|
| 72.20286 | -17.83797 | 24.16283 |
| 72.37143 | -17.81492 | 23.76563 |
| 72.54    | -17.78597 | 23.37543 |
| 72.70857 | -17.75142 | 22.99222 |
| 72.87714 | -17.71161 | 22.61594 |
| 73.04572 | -17.66681 | 22.24653 |
| 73.21429 | -17.61729 | 21.88394 |
| 73.38286 | -17.56334 | 21.52808 |
| 73.55143 | -17.50521 | 21.17888 |
| 73.72    | -17.44316 | 20.83628 |
| 73.88857 | -17.37741 | 20.50017 |
| 74.05714 | -17.3082  | 20.17048 |
| 74.22572 | -17.23574 | 19.84711 |
| 74.39429 | -17.16023 | 19.52997 |
| 74.56286 | -17.08188 | 19.21897 |
| 74.73143 | -17.00087 | 18.91401 |
| 74.9     | -16.91739 | 18.61498 |
| 75.06857 | -16.8316  | 18.32179 |
| 75.23714 | -16.74367 | 18.03434 |
| 75.40572 | -16.65375 | 17.75253 |
| 75.57429 | -16.562   | 17.47626 |
| 75.74286 | -16.46855 | 17.20541 |
| 75.91143 | -16.37353 | 16.9399  |
| 76.08    | -16.27708 | 16.67962 |
| 76.24857 | -16.17932 | 16.42446 |
| 76.41714 | -16.08036 | 16.17433 |
| 76.58572 | -15.9803  | 15.92914 |
| 76.75429 | -15.87926 | 15.68877 |
| 76.92286 | -15.77733 | 15.45314 |
| 77.09143 | -15.67461 | 15.22214 |
| 77.26    | -15.57118 | 14.99568 |
| 77.42857 | -15.46713 | 14.77366 |
| 77.59715 | -15.36253 | 14.556   |
| 77.76572 | -15.25747 | 14.34261 |
| 77.93429 | -15.15201 | 14.13338 |
| 78.10286 | -15.04622 | 13.92823 |
| 78.27143 | -14.94016 | 13.72708 |
| 78.44    | -14.8339  | 13.52984 |
| 78.60857 | -14.72749 | 13.33642 |
| 78.77715 | -14.62098 | 13.14675 |
| 78.94572 | -14.51442 | 12.96073 |
| 79.11429 | -14.40787 | 12.7783  |
| 79.28286 | -14.30137 | 12.59936 |
| 79.45143 | -14.19495 | 12.42386 |
| 79.62    | -14.08866 | 12.2517  |
| 79.78857 | -13.98254 | 12.08282 |
| 79.95715 | -13.87663 | 11.91715 |
| 80.12572 | -13.77094 | 11.75461 |
| 80.29429 | -13.66552 | 11.59513 |
| 80.46286 | -13.5604  | 11.43866 |
| 80.63143 | -13.45561 | 11.28512 |
| 80.8     | -13.35116 | 11.13444 |
| 80.96857 | -13.24708 | 10.98657 |



|          |           |          |
|----------|-----------|----------|
| 81.13715 | -13.1434  | 10.84144 |
| 81.30572 | -13.04013 | 10.69899 |
| 81.47429 | -12.9373  | 10.55917 |
| 81.64286 | -12.83491 | 10.42191 |
| 81.81143 | -12.73301 | 10.28717 |
| 81.98    | -12.63158 | 10.15487 |
| 82.14857 | -12.53066 | 10.02498 |
| 82.31715 | -12.43025 | 9.89743  |
| 82.48572 | -12.33037 | 9.77219  |
| 82.65429 | -12.23102 | 9.64918  |
| 82.82286 | -12.13223 | 9.52838  |
| 82.99143 | -12.03399 | 9.40973  |
| 83.16    | -11.93631 | 9.29318  |
| 83.32858 | -11.83921 | 9.17869  |
| 83.49715 | -11.7427  | 9.06621  |
| 83.66572 | -11.64677 | 8.9557   |
| 83.83428 | -11.55143 | 8.84713  |
| 84.00285 | -11.4567  | 8.74043  |
| 84.17142 | -11.36257 | 8.63558  |
| 84.34    | -11.26904 | 8.53254  |
| 84.50857 | -11.17613 | 8.43127  |
| 84.67714 | -11.08383 | 8.33173  |
| 84.84571 | -10.99215 | 8.23388  |
| 85.01428 | -10.90109 | 8.13769  |
| 85.18285 | -10.81065 | 8.04312  |
| 85.35143 | -10.72084 | 7.95014  |
| 85.52    | -10.63164 | 7.85872  |
| 85.68857 | -10.54307 | 7.76882  |
| 85.85714 | -10.45513 | 7.68042  |
| 86.02571 | -10.36781 | 7.59347  |
| 86.19428 | -10.28111 | 7.50796  |
| 86.36285 | -10.19503 | 7.42384  |
| 86.53143 | -10.10958 | 7.3411   |
| 86.7     | -10.02474 | 7.2597   |
| 86.86857 | -9.94053  | 7.17962  |
| 87.03714 | -9.85694  | 7.10083  |
| 87.20571 | -9.77396  | 7.02331  |
| 87.37428 | -9.69159  | 6.94702  |
| 87.54285 | -9.60983  | 6.87194  |
| 87.71143 | -9.52869  | 6.79805  |
| 87.88    | -9.44815  | 6.72533  |
| 88.04857 | -9.36821  | 6.65375  |
| 88.21714 | -9.28888  | 6.58329  |
| 88.38571 | -9.21014  | 6.51393  |
| 88.55428 | -9.132    | 6.44564  |
| 88.72285 | -9.05445  | 6.3784   |
| 88.89143 | -8.97749  | 6.3122   |
| 89.06    | -8.90112  | 6.24701  |
| 89.22857 | -8.82532  | 6.18281  |
| 89.39714 | -8.75011  | 6.11959  |
| 89.56571 | -8.67547  | 6.05733  |
| 89.73428 | -8.6014   | 5.99599  |
| 89.90285 | -8.52789  | 5.93558  |

|          |          |         |
|----------|----------|---------|
| 90.07143 | -8.45495 | 5.87607 |
| 90.24    | -8.38257 | 5.81745 |
| 90.40857 | -8.31075 | 5.75969 |
| 90.57714 | -8.23948 | 5.70278 |
| 90.74571 | -8.16875 | 5.6467  |
| 90.91428 | -8.09857 | 5.59145 |
| 91.08286 | -8.02893 | 5.537   |
| 91.25143 | -7.95982 | 5.48333 |
| 91.42    | -7.89125 | 5.43045 |
| 91.58857 | -7.8232  | 5.37832 |
| 91.75714 | -7.75568 | 5.32693 |
| 91.92571 | -7.68867 | 5.27628 |
| 92.09428 | -7.62218 | 5.22635 |
| 92.26286 | -7.5562  | 5.17712 |
| 92.43143 | -7.49073 | 5.12858 |
| 92.6     | -7.42576 | 5.08073 |
| 92.76857 | -7.36128 | 5.03354 |
| 92.93714 | -7.2973  | 4.987   |
| 93.10571 | -7.23382 | 4.94111 |
| 93.27428 | -7.17081 | 4.89586 |
| 93.44286 | -7.10829 | 4.85122 |
| 93.61143 | -7.04625 | 4.8072  |
| 93.78    | -6.98468 | 4.76377 |
| 93.94857 | -6.92358 | 4.72093 |
| 94.11714 | -6.86295 | 4.67867 |
| 94.28571 | -6.80278 | 4.63698 |
| 94.45428 | -6.74306 | 4.59584 |
| 94.62286 | -6.6838  | 4.55526 |
| 94.79143 | -6.62499 | 4.51522 |
| 94.96    | -6.56662 | 4.4757  |
| 95.12857 | -6.5087  | 4.4367  |
| 95.29714 | -6.45121 | 4.39822 |
| 95.46571 | -6.39416 | 4.36024 |
| 95.63428 | -6.33754 | 4.32275 |
| 95.80286 | -6.28134 | 4.28575 |
| 95.97143 | -6.22556 | 4.24923 |
| 96.14    | -6.17021 | 4.21318 |
| 96.30857 | -6.11526 | 4.17759 |
| 96.47714 | -6.06073 | 4.14246 |
| 96.64571 | -6.0066  | 4.10777 |
| 96.81429 | -5.95288 | 4.07352 |
| 96.98286 | -5.89956 | 4.0397  |
| 97.15143 | -5.84663 | 4.00631 |
| 97.32    | -5.7941  | 3.97333 |
| 97.48857 | -5.74195 | 3.94077 |
| 97.65714 | -5.69019 | 3.90861 |
| 97.82571 | -5.63881 | 3.87685 |
| 97.99429 | -5.58781 | 3.84548 |
| 98.16286 | -5.53719 | 3.8145  |
| 98.33143 | -5.48694 | 3.78389 |
| 98.5     | -5.43705 | 3.75366 |
| 98.66857 | -5.38753 | 3.7238  |
| 98.83714 | -5.33837 | 3.69429 |

|           |          |         |
|-----------|----------|---------|
| 99.00571  | -5.28957 | 3.66515 |
| 99.17429  | -5.24112 | 3.63635 |
| 99.34286  | -5.19302 | 3.6079  |
| 99.51143  | -5.14527 | 3.57978 |
| 99.68     | -5.09787 | 3.552   |
| 99.84857  | -5.05081 | 3.52455 |
| 100.01714 | -5.00408 | 3.49742 |
| 100.18571 | -4.9577  | 3.47061 |
| 100.35429 | -4.91164 | 3.44411 |
| 100.52286 | -4.86592 | 3.41792 |
| 100.69143 | -4.82052 | 3.39204 |
| 100.86    | -4.77544 | 3.36645 |
| 101.02857 | -4.73068 | 3.34116 |
| 101.19714 | -4.68624 | 3.31616 |
| 101.36572 | -4.64212 | 3.29145 |
| 101.53429 | -4.59831 | 3.26702 |
| 101.70286 | -4.5548  | 3.24286 |
| 101.87143 | -4.51161 | 3.21898 |
| 102.04    | -4.46871 | 3.19537 |
| 102.20857 | -4.42612 | 3.17202 |
| 102.37714 | -4.38382 | 3.14894 |
| 102.54572 | -4.34182 | 3.12611 |
| 102.71429 | -4.30011 | 3.10353 |
| 102.88286 | -4.25869 | 3.08121 |
| 103.05143 | -4.21755 | 3.05913 |
| 103.22    | -4.1767  | 3.0373  |
| 103.38857 | -4.13614 | 3.0157  |
| 103.55714 | -4.09585 | 2.99434 |
| 103.72572 | -4.05583 | 2.97321 |
| 103.89429 | -4.0161  | 2.95232 |
| 104.06286 | -3.97663 | 2.93165 |
| 104.23143 | -3.93743 | 2.9112  |
| 104.4     | -3.89851 | 2.89097 |
| 104.56857 | -3.85984 | 2.87095 |
| 104.73714 | -3.82144 | 2.85115 |
| 104.90572 | -3.78329 | 2.83156 |
| 105.07429 | -3.74541 | 2.81218 |
| 105.24286 | -3.70777 | 2.793   |
| 105.41143 | -3.6704  | 2.77402 |
| 105.58    | -3.63327 | 2.75525 |
| 105.74857 | -3.59639 | 2.73667 |
| 105.91714 | -3.55975 | 2.71828 |
| 106.08572 | -3.52336 | 2.70008 |
| 106.25429 | -3.48722 | 2.68207 |
| 106.42286 | -3.45131 | 2.66425 |
| 106.59143 | -3.41564 | 2.64661 |
| 106.76    | -3.3802  | 2.62915 |
| 106.92857 | -3.345   | 2.61186 |
| 107.09715 | -3.31002 | 2.59476 |
| 107.26572 | -3.27528 | 2.57783 |
| 107.43429 | -3.24077 | 2.56106 |
| 107.60286 | -3.20648 | 2.54447 |
| 107.77143 | -3.17241 | 2.52804 |

|           |          |         |
|-----------|----------|---------|
| 107.94    | -3.13856 | 2.51178 |
| 108.10857 | -3.10494 | 2.49568 |
| 108.27715 | -3.07153 | 2.47974 |
| 108.44572 | -3.03834 | 2.46396 |
| 108.61429 | -3.00536 | 2.44833 |
| 108.78286 | -2.97259 | 2.43286 |
| 108.95143 | -2.94003 | 2.41754 |
| 109.12    | -2.90768 | 2.40237 |
| 109.28857 | -2.87554 | 2.38734 |
| 109.45715 | -2.8436  | 2.37247 |
| 109.62572 | -2.81186 | 2.35773 |
| 109.79429 | -2.78033 | 2.34314 |
| 109.96286 | -2.74899 | 2.32869 |
| 110.13143 | -2.71785 | 2.31438 |
| 110.3     | -2.68691 | 2.30021 |
| 110.46857 | -2.65617 | 2.28617 |
| 110.63715 | -2.62561 | 2.27226 |
| 110.80572 | -2.59525 | 2.25849 |
| 110.97429 | -2.56507 | 2.24484 |
| 111.14286 | -2.53509 | 2.23133 |
| 111.31143 | -2.50529 | 2.21794 |
| 111.48    | -2.47567 | 2.20467 |
| 111.64857 | -2.44624 | 2.19153 |
| 111.81715 | -2.41699 | 2.17851 |
| 111.98572 | -2.38792 | 2.16562 |
| 112.15429 | -2.35902 | 2.15284 |
| 112.32286 | -2.33031 | 2.14018 |
| 112.49143 | -2.30177 | 2.12764 |
| 112.66    | -2.2734  | 2.11521 |
| 112.82858 | -2.24521 | 2.10289 |
| 112.99715 | -2.21719 | 2.09069 |
| 113.16572 | -2.18933 | 2.07859 |
| 113.33428 | -2.16165 | 2.06661 |
| 113.50285 | -2.13414 | 2.05474 |
| 113.67142 | -2.10679 | 2.04297 |
| 113.84    | -2.0796  | 2.03131 |
| 114.00857 | -2.05258 | 2.01975 |
| 114.17714 | -2.02571 | 2.00829 |
| 114.34571 | -1.99901 | 1.99694 |
| 114.51428 | -1.97247 | 1.98569 |
| 114.68285 | -1.94609 | 1.97453 |
| 114.85143 | -1.91986 | 1.96348 |
| 115.02    | -1.89378 | 1.95252 |
| 115.18857 | -1.86786 | 1.94166 |
| 115.35714 | -1.8421  | 1.93089 |
| 115.52571 | -1.81648 | 1.92022 |
| 115.69428 | -1.79102 | 1.90964 |
| 115.86285 | -1.7657  | 1.89915 |
| 116.03143 | -1.74053 | 1.88875 |
| 116.2     | -1.71551 | 1.87844 |
| 116.36857 | -1.69064 | 1.86822 |
| 116.53714 | -1.66591 | 1.85809 |
| 116.70571 | -1.64132 | 1.84804 |

|           |          |         |
|-----------|----------|---------|
| 116.87428 | -1.61687 | 1.83808 |
| 117.04285 | -1.59257 | 1.8282  |
| 117.21143 | -1.5684  | 1.81841 |
| 117.38    | -1.54438 | 1.8087  |
| 117.54857 | -1.52049 | 1.79907 |
| 117.71714 | -1.49673 | 1.78953 |
| 117.88571 | -1.47312 | 1.78006 |
| 118.05428 | -1.44963 | 1.77067 |
| 118.22285 | -1.42629 | 1.76136 |
| 118.39143 | -1.40307 | 1.75213 |
| 118.56    | -1.37998 | 1.74297 |
| 118.72857 | -1.35703 | 1.73389 |
| 118.89714 | -1.3342  | 1.72488 |
| 119.06571 | -1.3115  | 1.71595 |
| 119.23428 | -1.28893 | 1.70709 |
| 119.40285 | -1.26649 | 1.6983  |
| 119.57143 | -1.24417 | 1.68959 |
| 119.74    | -1.22198 | 1.68094 |
| 119.90857 | -1.19991 | 1.67237 |
| 120.07714 | -1.17796 | 1.66386 |
| 120.24571 | -1.15613 | 1.65543 |
| 120.41428 | -1.13443 | 1.64706 |
| 120.58286 | -1.11284 | 1.63876 |
| 120.75143 | -1.09137 | 1.63052 |
| 120.92    | -1.07002 | 1.62235 |
| 121.08857 | -1.04879 | 1.61424 |
| 121.25714 | -1.02768 | 1.6062  |
| 121.42571 | -1.00667 | 1.59823 |
| 121.59428 | -0.98579 | 1.59031 |
| 121.76286 | -0.96501 | 1.58246 |
| 121.93143 | -0.94435 | 1.57467 |
| 122.1     | -0.92381 | 1.56694 |
| 122.26857 | -0.90337 | 1.55927 |
| 122.43714 | -0.88304 | 1.55166 |
| 122.60571 | -0.86282 | 1.54411 |
| 122.77428 | -0.84271 | 1.53662 |
| 122.94286 | -0.82271 | 1.52918 |
| 123.11143 | -0.80282 | 1.5218  |
| 123.28    | -0.78303 | 1.51448 |
| 123.44857 | -0.76335 | 1.50722 |
| 123.61714 | -0.74377 | 1.50001 |
| 123.78571 | -0.7243  | 1.49285 |
| 123.95428 | -0.70492 | 1.48576 |
| 124.12286 | -0.68566 | 1.47871 |
| 124.29143 | -0.66649 | 1.47172 |
| 124.46    | -0.64742 | 1.46478 |
| 124.62857 | -0.62846 | 1.45789 |
| 124.79714 | -0.60959 | 1.45105 |
| 124.96571 | -0.59082 | 1.44427 |
| 125.13428 | -0.57215 | 1.43753 |
| 125.30286 | -0.55358 | 1.43085 |
| 125.47143 | -0.5351  | 1.42422 |
| 125.64    | -0.51673 | 1.41763 |

|           |          |         |
|-----------|----------|---------|
| 125.80857 | -0.49844 | 1.41109 |
| 125.97714 | -0.48025 | 1.40461 |
| 126.14571 | -0.46215 | 1.39817 |
| 126.31429 | -0.44415 | 1.39177 |
| 126.48286 | -0.42624 | 1.38543 |
| 126.65143 | -0.40842 | 1.37913 |
| 126.82    | -0.39069 | 1.37287 |
| 126.98857 | -0.37306 | 1.36666 |
| 127.15714 | -0.35551 | 1.3605  |
| 127.32571 | -0.33805 | 1.35438 |
| 127.49429 | -0.32069 | 1.3483  |
| 127.66286 | -0.30341 | 1.34227 |
| 127.83143 | -0.28621 | 1.33628 |
| 128       | -0.26911 | 1.33034 |
| 128.16856 | -0.25209 | 1.32444 |
| 128.33714 | -0.23515 | 1.31857 |
| 128.50571 | -0.2183  | 1.31276 |
| 128.67429 | -0.20154 | 1.30698 |
| 128.84285 | -0.18486 | 1.30124 |
| 129.01143 | -0.16826 | 1.29554 |
| 129.17999 | -0.15175 | 1.28989 |
| 129.34857 | -0.13531 | 1.28427 |
| 129.51714 | -0.11896 | 1.27869 |
| 129.68571 | -0.10269 | 1.27315 |
| 129.85428 | -0.0865  | 1.26766 |
| 130.02286 | -0.07039 | 1.26219 |
| 130.19142 | -0.05436 | 1.25677 |
| 130.36    | -0.03841 | 1.25138 |
| 130.52856 | -0.02254 | 1.24603 |
| 130.69714 | -0.00674 | 1.24072 |
| 130.86571 | 0.00897  | 1.23545 |
| 131.03429 | 0.02461  | 1.23021 |
| 131.20285 | 0.04018  | 1.225   |
| 131.37143 | 0.05567  | 1.21984 |
| 131.53999 | 0.07108  | 1.2147  |
| 131.70857 | 0.08642  | 1.20961 |
| 131.87714 | 0.10169  | 1.20454 |
| 132.04572 | 0.11688  | 1.19951 |
| 132.21428 | 0.13199  | 1.19452 |
| 132.38286 | 0.14704  | 1.18956 |
| 132.55142 | 0.16201  | 1.18463 |
| 132.72    | 0.17691  | 1.17973 |
| 132.88857 | 0.19174  | 1.17487 |
| 133.05714 | 0.2065   | 1.17004 |
| 133.22571 | 0.22119  | 1.16524 |
| 133.39429 | 0.23581  | 1.16048 |
| 133.56285 | 0.25036  | 1.15574 |
| 133.73143 | 0.26484  | 1.15104 |
| 133.89999 | 0.27925  | 1.14637 |
| 134.06857 | 0.29359  | 1.14172 |
| 134.23714 | 0.30787  | 1.13711 |
| 134.40572 | 0.32208  | 1.13253 |
| 134.57428 | 0.33622  | 1.12798 |

|           |         |         |
|-----------|---------|---------|
| 134.74286 | 0.35029 | 1.12346 |
| 134.91142 | 0.3643  | 1.11897 |
| 135.08    | 0.37825 | 1.11451 |
| 135.24857 | 0.39213 | 1.11007 |
| 135.41714 | 0.40594 | 1.10567 |
| 135.58571 | 0.41969 | 1.10129 |
| 135.75429 | 0.43338 | 1.09694 |
| 135.92285 | 0.447   | 1.09262 |
| 136.09143 | 0.46056 | 1.08833 |
| 136.25999 | 0.47406 | 1.08406 |
| 136.42857 | 0.48749 | 1.07983 |
| 136.59714 | 0.50086 | 1.07562 |
| 136.76572 | 0.51418 | 1.07143 |
| 136.93428 | 0.52743 | 1.06727 |
| 137.10286 | 0.54062 | 1.06314 |
| 137.27142 | 0.55375 | 1.05904 |
| 137.44    | 0.56682 | 1.05496 |
| 137.60857 | 0.57983 | 1.0509  |
| 137.77715 | 0.59278 | 1.04687 |
| 137.94571 | 0.60567 | 1.04287 |
| 138.11429 | 0.6185  | 1.03889 |
| 138.28285 | 0.63128 | 1.03494 |
| 138.45143 | 0.644   | 1.03101 |
| 138.62    | 0.65666 | 1.0271  |
| 138.78857 | 0.66926 | 1.02322 |
| 138.95714 | 0.68181 | 1.01937 |
| 139.12572 | 0.6943  | 1.01553 |
| 139.29428 | 0.70674 | 1.01172 |
| 139.46286 | 0.71912 | 1.00794 |
| 139.63142 | 0.73144 | 1.00418 |
| 139.8     | 0.74371 | 1.00044 |
| 139.96857 | 0.75592 | 0.99672 |
| 140.13715 | 0.76809 | 0.99302 |
| 140.30571 | 0.78019 | 0.98935 |
| 140.47429 | 0.79225 | 0.9857  |
| 140.64285 | 0.80425 | 0.98208 |
| 140.81143 | 0.81619 | 0.97847 |
| 140.98    | 0.82809 | 0.97489 |
| 141.14857 | 0.83993 | 0.97132 |
| 141.31714 | 0.85172 | 0.96778 |
| 141.48572 | 0.86346 | 0.96426 |
| 141.65428 | 0.87515 | 0.96076 |
| 141.82286 | 0.88678 | 0.95729 |
| 141.99142 | 0.89837 | 0.95383 |
| 142.16    | 0.9099  | 0.95039 |
| 142.32857 | 0.92139 | 0.94698 |
| 142.49715 | 0.93282 | 0.94358 |
| 142.66571 | 0.94421 | 0.9402  |
| 142.83429 | 0.95555 | 0.93685 |
| 143.00285 | 0.96683 | 0.93351 |
| 143.17143 | 0.97807 | 0.93019 |
| 143.34    | 0.98926 | 0.9269  |
| 143.50858 | 1.00041 | 0.92362 |

|             |         |         |
|-------------|---------|---------|
| 143.67714   | 1.0115  | 0.92036 |
| 143.84572   | 1.02255 | 0.91712 |
| 144.01428   | 1.03355 | 0.9139  |
| 144.18286   | 1.0445  | 0.91069 |
| 144.35143   | 1.05541 | 0.90751 |
| 144.52      | 1.06627 | 0.90434 |
| 144.68857   | 1.07708 | 0.90119 |
| 144.85715   | 1.08785 | 0.89807 |
| 145.02571   | 1.09857 | 0.89495 |
| 145.19429   | 1.10925 | 0.89186 |
| 145.36285   | 1.11988 | 0.88878 |
| 145.53143   | 1.13047 | 0.88572 |
| 145.7114101 | 0.88268 |         |
| 145.86858   | 1.15151 | 0.87966 |
| 146.03714   | 1.16197 | 0.87665 |
| 146.20572   | 1.17238 | 0.87366 |
| 146.37428   | 1.18275 | 0.87069 |
| 146.54286   | 1.19307 | 0.86773 |
| 146.71143   | 1.20335 | 0.86479 |
| 146.88      | 1.21359 | 0.86187 |
| 147.04857   | 1.22379 | 0.85896 |
| 147.21715   | 1.23394 | 0.85607 |
| 147.38571   | 1.24405 | 0.8532  |
| 147.55429   | 1.25412 | 0.85034 |
| 147.72285   | 1.26415 | 0.8475  |
| 147.89143   | 1.27414 | 0.84467 |
| 148.06      | 1.28408 | 0.84186 |
| 148.22858   | 1.29399 | 0.83906 |
| 148.39714   | 1.30385 | 0.83628 |
| 148.56572   | 1.31368 | 0.83352 |
| 148.73428   | 1.32346 | 0.83077 |
| 148.90286   | 1.33321 | 0.82804 |
| 149.07143   | 1.34291 | 0.82532 |
| 149.24001   | 1.35258 | 0.82261 |
| 149.40857   | 1.3622  | 0.81992 |
| 149.57715   | 1.37179 | 0.81725 |
| 149.74571   | 1.38134 | 0.81458 |
| 149.91429   | 1.39085 | 0.81194 |
| 150.08286   | 1.40032 | 0.80931 |
| 150.25143   | 1.40975 | 0.80669 |
| 150.42      | 1.41914 | 0.80408 |
| 150.58858   | 1.4285  | 0.80149 |
| 150.75714   | 1.43782 | 0.79892 |
| 150.92572   | 1.4471  | 0.79636 |
| 151.09428   | 1.45635 | 0.79381 |
| 151.26286   | 1.46555 | 0.79127 |
| 151.43143   | 1.47473 | 0.78875 |
| 151.60001   | 1.48386 | 0.78624 |
| 151.76857   | 1.49296 | 0.78375 |
| 151.93715   | 1.50202 | 0.78127 |
| 152.10571   | 1.51105 | 0.7788  |
| 152.27429   | 1.52004 | 0.77635 |
| 152.44286   | 1.52899 | 0.7739  |



|           |         |         |
|-----------|---------|---------|
| 152.61143 | 1.53791 | 0.77147 |
| 152.78    | 1.5468  | 0.76906 |
| 152.94858 | 1.55565 | 0.76665 |
| 153.11714 | 1.56446 | 0.76426 |
| 153.28572 | 1.57324 | 0.76188 |
| 153.45428 | 1.58199 | 0.75952 |
| 153.62286 | 1.5907  | 0.75716 |
| 153.79143 | 1.59937 | 0.75482 |
| 153.96001 | 1.60802 | 0.75249 |
| 154.12857 | 1.61663 | 0.75017 |
| 154.29715 | 1.62521 | 0.74787 |
| 154.46571 | 1.63375 | 0.74557 |
| 154.63429 | 1.64226 | 0.74329 |
| 154.80286 | 1.65073 | 0.74102 |
| 154.97144 | 1.65918 | 0.73876 |
| 155.14    | 1.66759 | 0.73652 |
| 155.30858 | 1.67597 | 0.73428 |
| 155.47714 | 1.68432 | 0.73206 |
| 155.64572 | 1.69263 | 0.72984 |
| 155.81429 | 1.70091 | 0.72764 |
| 155.98286 | 1.70917 | 0.72545 |
| 156.15143 | 1.71739 | 0.72327 |
| 156.32001 | 1.72557 | 0.7211  |
| 156.48857 | 1.73373 | 0.71895 |
| 156.65715 | 1.74186 | 0.7168  |
| 156.82571 | 1.74995 | 0.71466 |
| 156.99429 | 1.75802 | 0.71254 |
| 157.16286 | 1.76605 | 0.71042 |
| 157.33144 | 1.77405 | 0.70832 |
| 157.5     | 1.78203 | 0.70623 |
| 157.66856 | 1.78997 | 0.70414 |
| 157.83714 | 1.79788 | 0.70207 |
| 158.00571 | 1.80576 | 0.70001 |
| 158.17429 | 1.81362 | 0.69796 |
| 158.34285 | 1.82144 | 0.69591 |
| 158.51143 | 1.82923 | 0.69388 |
| 158.67999 | 1.837   | 0.69186 |
| 158.84857 | 1.84474 | 0.68985 |
| 159.01714 | 1.85244 | 0.68785 |
| 159.18571 | 1.86012 | 0.68586 |
| 159.35428 | 1.86777 | 0.68387 |
| 159.52286 | 1.87539 | 0.6819  |
| 159.69142 | 1.88299 | 0.67994 |
| 159.86    | 1.89055 | 0.67798 |
| 160.02856 | 1.89809 | 0.67604 |
| 160.19714 | 1.9056  | 0.6741  |
| 160.36571 | 1.91308 | 0.67218 |
| 160.53429 | 1.92053 | 0.67026 |
| 160.70285 | 1.92796 | 0.66836 |
| 160.87143 | 1.93536 | 0.66646 |
| 161.03999 | 1.94273 | 0.66457 |
| 161.20857 | 1.95007 | 0.66269 |
| 161.37714 | 1.95739 | 0.66082 |

|           |         |         |
|-----------|---------|---------|
| 161.54572 | 1.96468 | 0.65896 |
| 161.71428 | 1.97194 | 0.65711 |
| 161.88286 | 1.97918 | 0.65527 |
| 162.05142 | 1.98639 | 0.65343 |
| 162.22    | 1.99358 | 0.6516  |
| 162.38857 | 2.00074 | 0.64979 |
| 162.55714 | 2.00787 | 0.64798 |
| 162.72571 | 2.01498 | 0.64618 |
| 162.89429 | 2.02206 | 0.64439 |
| 163.06285 | 2.02911 | 0.6426  |
| 163.23143 | 2.03614 | 0.64083 |
| 163.39999 | 2.04315 | 0.63906 |
| 163.56857 | 2.05013 | 0.6373  |
| 163.73714 | 2.05708 | 0.63555 |
| 163.90572 | 2.06401 | 0.63381 |
| 164.07428 | 2.07092 | 0.63208 |
| 164.24286 | 2.0778  | 0.63035 |
| 164.41142 | 2.08465 | 0.62864 |
| 164.58    | 2.09148 | 0.62693 |
| 164.74857 | 2.09829 | 0.62523 |
| 164.91714 | 2.10507 | 0.62353 |
| 165.08571 | 2.11183 | 0.62185 |
| 165.25429 | 2.11857 | 0.62017 |
| 165.42285 | 2.12528 | 0.6185  |
| 165.59143 | 2.13196 | 0.61683 |
| 165.75999 | 2.13863 | 0.61518 |
| 165.92857 | 2.14526 | 0.61353 |
| 166.09714 | 2.15188 | 0.61189 |
| 166.26572 | 2.15847 | 0.61026 |
| 166.43428 | 2.16504 | 0.60864 |
| 166.60286 | 2.17159 | 0.60702 |
| 166.77142 | 2.17811 | 0.60541 |
| 166.94    | 2.18461 | 0.6038  |
| 167.10857 | 2.19109 | 0.60221 |
| 167.27715 | 2.19755 | 0.60062 |
| 167.44571 | 2.20398 | 0.59904 |
| 167.61429 | 2.21039 | 0.59747 |
| 167.78285 | 2.21677 | 0.5959  |
| 167.95143 | 2.22314 | 0.59434 |
| 168.12    | 2.22948 | 0.59279 |
| 168.28857 | 2.23581 | 0.59124 |
| 168.45714 | 2.2421  | 0.5897  |
| 168.62572 | 2.24838 | 0.58817 |
| 168.79428 | 2.25464 | 0.58664 |
| 168.96286 | 2.26087 | 0.58512 |
| 169.13142 | 2.26709 | 0.58361 |
| 169.3     | 2.27328 | 0.58211 |
| 169.46857 | 2.27945 | 0.58061 |
| 169.63715 | 2.2856  | 0.57912 |
| 169.80571 | 2.29172 | 0.57763 |
| 169.97429 | 2.29783 | 0.57615 |
| 170.14285 | 2.30392 | 0.57468 |
| 170.31143 | 2.30998 | 0.57322 |

|           |         |         |
|-----------|---------|---------|
| 170.48    | 2.31603 | 0.57176 |
| 170.64857 | 2.32205 | 0.5703  |
| 170.81714 | 2.32805 | 0.56886 |
| 170.98572 | 2.33404 | 0.56742 |
| 171.15428 | 2.34    | 0.56598 |
| 171.32286 | 2.34594 | 0.56456 |
| 171.49142 | 2.35186 | 0.56314 |
| 171.66    | 2.35777 | 0.56172 |
| 171.82857 | 2.36365 | 0.56031 |
| 171.99715 | 2.36951 | 0.55891 |
| 172.16571 | 2.37535 | 0.55751 |
| 172.33429 | 2.38118 | 0.55612 |
| 172.50285 | 2.38698 | 0.55474 |
| 172.67143 | 2.39276 | 0.55336 |
| 172.84    | 2.39853 | 0.55198 |
| 173.00858 | 2.40427 | 0.55062 |
| 173.17714 | 2.41    | 0.54926 |
| 173.34572 | 2.41571 | 0.5479  |
| 173.51428 | 2.4214  | 0.54655 |
| 173.68286 | 2.42706 | 0.54521 |
| 173.85143 | 2.43271 | 0.54387 |
| 174.02    | 2.43835 | 0.54254 |
| 174.18857 | 2.44396 | 0.54121 |
| 174.35715 | 2.44955 | 0.53989 |
| 174.52571 | 2.45513 | 0.53857 |
| 174.69429 | 2.46069 | 0.53726 |
| 174.86285 | 2.46622 | 0.53596 |
| 175.03143 | 2.47174 | 0.53466 |
| 175.2     | 2.47725 | 0.53337 |
| 175.36858 | 2.48273 | 0.53208 |
| 175.53714 | 2.4882  | 0.53079 |
| 175.70572 | 2.49364 | 0.52952 |
| 175.87428 | 2.49907 | 0.52824 |
| 176.04286 | 2.50449 | 0.52698 |
| 176.21143 | 2.50988 | 0.52572 |
| 176.38    | 2.51526 | 0.52446 |
| 176.54857 | 2.52062 | 0.52321 |
| 176.71715 | 2.52596 | 0.52196 |
| 176.88571 | 2.53129 | 0.52072 |
| 177.05429 | 2.53659 | 0.51949 |
| 177.22285 | 2.54188 | 0.51826 |
| 177.39143 | 2.54716 | 0.51703 |
| 177.56    | 2.55241 | 0.51581 |
| 177.72858 | 2.55765 | 0.5146  |
| 177.89714 | 2.56287 | 0.51339 |
| 178.06572 | 2.56808 | 0.51218 |
| 178.23428 | 2.57327 | 0.51098 |
| 178.40286 | 2.57844 | 0.50978 |
| 178.57143 | 2.58359 | 0.50859 |
| 178.74001 | 2.58873 | 0.50741 |
| 178.90857 | 2.59385 | 0.50623 |
| 179.07715 | 2.59896 | 0.50505 |
| 179.24571 | 2.60405 | 0.50388 |

|           |         |         |
|-----------|---------|---------|
| 179.41429 | 2.60912 | 0.50271 |
| 179.58286 | 2.61418 | 0.50155 |
| 179.75143 | 2.61922 | 0.50039 |
| 179.92    | 2.62424 | 0.49924 |
| 180.08858 | 2.62925 | 0.49809 |
| 180.25714 | 2.63424 | 0.49695 |
| 180.42572 | 2.63922 | 0.49581 |
| 180.59428 | 2.64418 | 0.49468 |
| 180.76286 | 2.64912 | 0.49355 |
| 180.93143 | 2.65405 | 0.49242 |
| 181.10001 | 2.65897 | 0.4913  |
| 181.26857 | 2.66387 | 0.49019 |
| 181.43715 | 2.66875 | 0.48907 |
| 181.60571 | 2.67362 | 0.48797 |
| 181.77429 | 2.67847 | 0.48686 |
| 181.94286 | 2.68331 | 0.48577 |
| 182.11143 | 2.68813 | 0.48467 |
| 182.28    | 2.69293 | 0.48358 |
| 182.44858 | 2.69773 | 0.4825  |
| 182.61714 | 2.7025  | 0.48142 |
| 182.78572 | 2.70727 | 0.48034 |
| 182.95428 | 2.71201 | 0.47927 |
| 183.12286 | 2.71674 | 0.4782  |
| 183.29143 | 2.72146 | 0.47713 |
| 183.46001 | 2.72616 | 0.47607 |
| 183.62857 | 2.73085 | 0.47502 |
| 183.79715 | 2.73553 | 0.47396 |
| 183.96571 | 2.74018 | 0.47292 |
| 184.13429 | 2.74483 | 0.47187 |
| 184.30286 | 2.74946 | 0.47083 |
| 184.47144 | 2.75408 | 0.4698  |
| 184.64    | 2.75868 | 0.46876 |
| 184.80858 | 2.76326 | 0.46774 |
| 184.97714 | 2.76784 | 0.46671 |
| 185.14572 | 2.7724  | 0.46569 |
| 185.31429 | 2.77694 | 0.46468 |
| 185.48286 | 2.78147 | 0.46367 |
| 185.65143 | 2.78599 | 0.46266 |
| 185.82001 | 2.7905  | 0.46165 |
| 185.98857 | 2.79498 | 0.46065 |
| 186.15715 | 2.79946 | 0.45966 |
| 186.32571 | 2.80392 | 0.45866 |
| 186.49429 | 2.80837 | 0.45767 |
| 186.66286 | 2.81281 | 0.45669 |
| 186.83144 | 2.81723 | 0.45571 |
| 187       | 2.82164 | 0.45473 |
| 187.16856 | 2.82603 | 0.45376 |
| 187.33714 | 2.83041 | 0.45279 |
| 187.50571 | 2.83478 | 0.45182 |
| 187.67429 | 2.83914 | 0.45086 |
| 187.84285 | 2.84348 | 0.4499  |
| 188.01143 | 2.84781 | 0.44894 |
| 188.17999 | 2.85212 | 0.44799 |

|           |         |         |
|-----------|---------|---------|
| 188.34857 | 2.85643 | 0.44704 |
| 188.51714 | 2.86072 | 0.4461  |
| 188.68571 | 2.865   | 0.44515 |
| 188.85428 | 2.86926 | 0.44422 |
| 189.02286 | 2.87351 | 0.44328 |
| 189.19142 | 2.87775 | 0.44235 |
| 189.36    | 2.88198 | 0.44142 |
| 189.52856 | 2.88619 | 0.4405  |
| 189.69714 | 2.89039 | 0.43958 |
| 189.86571 | 2.89458 | 0.43866 |
| 190.03429 | 2.89875 | 0.43775 |
| 190.20285 | 2.90292 | 0.43684 |
| 190.37143 | 2.90707 | 0.43593 |
| 190.53999 | 2.91121 | 0.43503 |
| 190.70857 | 2.91533 | 0.43413 |
| 190.87714 | 2.91945 | 0.43323 |
| 191.04572 | 2.92355 | 0.43233 |
| 191.21428 | 2.92764 | 0.43144 |
| 191.38286 | 2.93172 | 0.43056 |
| 191.55142 | 2.93579 | 0.42967 |
| 191.72    | 2.93984 | 0.42879 |
| 191.88857 | 2.94388 | 0.42791 |
| 192.05714 | 2.94791 | 0.42704 |
| 192.22571 | 2.95193 | 0.42617 |
| 192.39429 | 2.95594 | 0.4253  |
| 192.56285 | 2.95993 | 0.42443 |
| 192.73143 | 2.96391 | 0.42357 |
| 192.89999 | 2.96789 | 0.42271 |
| 193.06857 | 2.97185 | 0.42186 |
| 193.23714 | 2.97579 | 0.42101 |
| 193.40572 | 2.97973 | 0.42016 |
| 193.57428 | 2.98365 | 0.41931 |
| 193.74286 | 2.98757 | 0.41847 |
| 193.91142 | 2.99147 | 0.41763 |
| 194.08    | 2.99536 | 0.41679 |
| 194.24857 | 2.99924 | 0.41596 |
| 194.41714 | 3.00311 | 0.41512 |
| 194.58571 | 3.00697 | 0.4143  |
| 194.75429 | 3.01082 | 0.41347 |
| 194.92285 | 3.01465 | 0.41265 |
| 195.09143 | 3.01848 | 0.41183 |
| 195.25999 | 3.02229 | 0.41101 |
| 195.42857 | 3.02609 | 0.4102  |
| 195.59714 | 3.02988 | 0.40939 |
| 195.76572 | 3.03366 | 0.40858 |
| 195.93428 | 3.03743 | 0.40777 |
| 196.10286 | 3.04119 | 0.40697 |
| 196.27142 | 3.04494 | 0.40617 |
| 196.44    | 3.04868 | 0.40538 |
| 196.60857 | 3.0524  | 0.40458 |
| 196.77715 | 3.05612 | 0.40379 |
| 196.94571 | 3.05982 | 0.403   |
| 197.11429 | 3.06352 | 0.40222 |

|           |         |         |
|-----------|---------|---------|
| 197.28285 | 3.0672  | 0.40143 |
| 197.45143 | 3.07088 | 0.40065 |
| 197.62    | 3.07454 | 0.39988 |
| 197.78857 | 3.07819 | 0.3991  |
| 197.95714 | 3.08184 | 0.39833 |
| 198.12572 | 3.08547 | 0.39756 |
| 198.29428 | 3.08909 | 0.39679 |
| 198.46286 | 3.0927  | 0.39603 |
| 198.63142 | 3.09631 | 0.39527 |
| 198.8     | 3.0999  | 0.39451 |
| 198.96857 | 3.10348 | 0.39376 |
| 199.13715 | 3.10705 | 0.393   |
| 199.30571 | 3.11061 | 0.39225 |
| 199.47429 | 3.11416 | 0.3915  |
| 199.64285 | 3.1177  | 0.39076 |
| 199.81143 | 3.12123 | 0.39001 |
| 199.98    | 3.12476 | 0.38927 |
| 200.14857 | 3.12827 | 0.38854 |
| 200.31714 | 3.13177 | 0.3878  |
| 200.48572 | 3.13526 | 0.38707 |
| 200.65428 | 3.13874 | 0.38634 |
| 200.82286 | 3.14222 | 0.38561 |
| 200.99142 | 3.14568 | 0.38488 |
| 201.16    | 3.14913 | 0.38416 |
| 201.32857 | 3.15258 | 0.38344 |
| 201.49715 | 3.15601 | 0.38272 |
| 201.66571 | 3.15944 | 0.382   |
| 201.83429 | 3.16285 | 0.38129 |
| 202.00285 | 3.16626 | 0.38058 |
| 202.17143 | 3.16966 | 0.37987 |
| 202.34    | 3.17304 | 0.37917 |
| 202.50858 | 3.17642 | 0.37846 |
| 202.67714 | 3.17979 | 0.37776 |
| 202.84572 | 3.18315 | 0.37706 |
| 203.01428 | 3.1865  | 0.37636 |
| 203.18286 | 3.18984 | 0.37567 |
| 203.35143 | 3.19317 | 0.37498 |
| 203.52    | 3.19649 | 0.37429 |
| 203.68857 | 3.19981 | 0.3736  |
| 203.85715 | 3.20311 | 0.37292 |
| 204.02571 | 3.20641 | 0.37223 |
| 204.19429 | 3.20969 | 0.37155 |
| 204.36285 | 3.21297 | 0.37087 |
| 204.53143 | 3.21624 | 0.3702  |
| 204.7     | 3.2195  | 0.36952 |
| 204.86858 | 3.22275 | 0.36885 |
| 205.03714 | 3.22599 | 0.36818 |
| 205.20572 | 3.22922 | 0.36751 |
| 205.37428 | 3.23245 | 0.36685 |
| 205.54286 | 3.23566 | 0.36619 |
| 205.71143 | 3.23887 | 0.36553 |
| 205.88    | 3.24207 | 0.36487 |
| 206.04857 | 3.24526 | 0.36421 |

|           |         |         |
|-----------|---------|---------|
| 206.21715 | 3.24844 | 0.36356 |
| 206.38571 | 3.25161 | 0.3629  |
| 206.55429 | 3.25478 | 0.36225 |
| 206.72285 | 3.25793 | 0.36161 |
| 206.89143 | 3.26108 | 0.36096 |
| 207.06    | 3.26422 | 0.36032 |
| 207.22858 | 3.26735 | 0.35967 |
| 207.39714 | 3.27047 | 0.35904 |
| 207.56572 | 3.27358 | 0.3584  |
| 207.73428 | 3.27669 | 0.35776 |
| 207.90286 | 3.27978 | 0.35713 |
| 208.07143 | 3.28287 | 0.3565  |
| 208.24001 | 3.28595 | 0.35587 |
| 208.40857 | 3.28902 | 0.35524 |
| 208.57715 | 3.29209 | 0.35462 |
| 208.74571 | 3.29514 | 0.35399 |
| 208.91429 | 3.29819 | 0.35337 |
| 209.08286 | 3.30123 | 0.35275 |
| 209.25143 | 3.30426 | 0.35213 |
| 209.42    | 3.30728 | 0.35152 |
| 209.58858 | 3.3103  | 0.35091 |
| 209.75714 | 3.31331 | 0.35029 |
| 209.92572 | 3.31631 | 0.34968 |
| 210.09428 | 3.3193  | 0.34908 |
| 210.26286 | 3.32228 | 0.34847 |
| 210.43143 | 3.32526 | 0.34787 |
| 210.60001 | 3.32823 | 0.34727 |
| 210.76857 | 3.33119 | 0.34667 |
| 210.93715 | 3.33414 | 0.34607 |
| 211.10571 | 3.33708 | 0.34547 |
| 211.27429 | 3.34002 | 0.34488 |
| 211.44286 | 3.34295 | 0.34429 |
| 211.61143 | 3.34587 | 0.34369 |
| 211.78    | 3.34879 | 0.34311 |
| 211.94858 | 3.35169 | 0.34252 |
| 212.11714 | 3.35459 | 0.34193 |
| 212.28572 | 3.35748 | 0.34135 |
| 212.45428 | 3.36037 | 0.34077 |
| 212.62286 | 3.36324 | 0.34019 |
| 212.79143 | 3.36611 | 0.33961 |
| 212.96001 | 3.36897 | 0.33904 |
| 213.12857 | 3.37183 | 0.33846 |
| 213.29715 | 3.37467 | 0.33789 |
| 213.46571 | 3.37751 | 0.33732 |
| 213.63429 | 3.38034 | 0.33675 |
| 213.80286 | 3.38317 | 0.33618 |
| 213.97144 | 3.38599 | 0.33562 |
| 214.14    | 3.3888  | 0.33506 |
| 214.30858 | 3.3916  | 0.33449 |
| 214.47714 | 3.39439 | 0.33393 |
| 214.64572 | 3.39718 | 0.33337 |
| 214.81429 | 3.39996 | 0.33282 |
| 214.98286 | 3.40274 | 0.33226 |

|           |         |         |
|-----------|---------|---------|
| 215.15143 | 3.40551 | 0.33171 |
| 215.32001 | 3.40826 | 0.33116 |
| 215.48857 | 3.41102 | 0.33061 |
| 215.65715 | 3.41376 | 0.33006 |
| 215.82571 | 3.4165  | 0.32951 |
| 215.99429 | 3.41923 | 0.32897 |
| 216.16286 | 3.42196 | 0.32843 |
| 216.33144 | 3.42468 | 0.32788 |
| 216.5     | 3.42739 | 0.32734 |
| 216.66856 | 3.43009 | 0.32681 |
| 216.83714 | 3.43279 | 0.32627 |
| 217.00571 | 3.43548 | 0.32573 |
| 217.17429 | 3.43816 | 0.3252  |
| 217.34285 | 3.44084 | 0.32467 |
| 217.51143 | 3.44351 | 0.32414 |
| 217.67999 | 3.44617 | 0.32361 |
| 217.84857 | 3.44883 | 0.32308 |
| 218.01714 | 3.45148 | 0.32256 |
| 218.18571 | 3.45412 | 0.32203 |
| 218.35428 | 3.45676 | 0.32151 |
| 218.52286 | 3.45939 | 0.32099 |
| 218.69142 | 3.46201 | 0.32047 |
| 218.86    | 3.46463 | 0.31995 |
| 219.02856 | 3.46724 | 0.31944 |
| 219.19714 | 3.46984 | 0.31892 |
| 219.36571 | 3.47244 | 0.31841 |
| 219.53429 | 3.47503 | 0.3179  |
| 219.70285 | 3.47761 | 0.31739 |
| 219.87143 | 3.48019 | 0.31688 |
| 220.03999 | 3.48276 | 0.31637 |
| 220.20857 | 3.48533 | 0.31587 |
| 220.37714 | 3.48788 | 0.31536 |
| 220.54572 | 3.49044 | 0.31486 |
| 220.71428 | 3.49298 | 0.31436 |
| 220.88286 | 3.49552 | 0.31386 |
| 221.05142 | 3.49805 | 0.31336 |
| 221.22    | 3.50058 | 0.31287 |
| 221.38857 | 3.5031  | 0.31237 |
| 221.55714 | 3.50562 | 0.31188 |
| 221.72571 | 3.50812 | 0.31139 |
| 221.89429 | 3.51062 | 0.3109  |
| 222.06285 | 3.51312 | 0.31041 |
| 222.23143 | 3.51561 | 0.30992 |
| 222.39999 | 3.51809 | 0.30943 |
| 222.56857 | 3.52057 | 0.30895 |
| 222.73714 | 3.52304 | 0.30846 |
| 222.90572 | 3.52551 | 0.30798 |
| 223.07428 | 3.52796 | 0.3075  |
| 223.24286 | 3.53042 | 0.30702 |
| 223.41142 | 3.53286 | 0.30654 |
| 223.58    | 3.5353  | 0.30607 |
| 223.74857 | 3.53774 | 0.30559 |
| 223.91714 | 3.54017 | 0.30512 |



|           |         |         |
|-----------|---------|---------|
| 224.08571 | 3.54259 | 0.30464 |
| 224.25429 | 3.54501 | 0.30417 |
| 224.42285 | 3.54742 | 0.3037  |
| 224.59143 | 3.54982 | 0.30323 |
| 224.75999 | 3.55222 | 0.30277 |
| 224.92857 | 3.55462 | 0.3023  |
| 225.09714 | 3.55701 | 0.30184 |
| 225.26572 | 3.55939 | 0.30137 |
| 225.43428 | 3.56176 | 0.30091 |
| 225.60286 | 3.56413 | 0.30045 |
| 225.77142 | 3.5665  | 0.29999 |
| 225.94    | 3.56886 | 0.29953 |
| 226.10857 | 3.57121 | 0.29908 |
| 226.27715 | 3.57356 | 0.29862 |
| 226.44571 | 3.5759  | 0.29817 |
| 226.61429 | 3.57824 | 0.29772 |
| 226.78285 | 3.58057 | 0.29726 |
| 226.95143 | 3.58289 | 0.29681 |
| 227.12    | 3.58521 | 0.29637 |
| 227.28857 | 3.58752 | 0.29592 |
| 227.45714 | 3.58983 | 0.29547 |
| 227.62572 | 3.59214 | 0.29503 |
| 227.79428 | 3.59443 | 0.29458 |
| 227.96286 | 3.59672 | 0.29414 |
| 228.13142 | 3.59901 | 0.2937  |
| 228.3     | 3.60129 | 0.29326 |
| 228.46857 | 3.60357 | 0.29282 |
| 228.63715 | 3.60584 | 0.29238 |
| 228.80571 | 3.6081  | 0.29195 |
| 228.97429 | 3.61036 | 0.29151 |
| 229.14285 | 3.61261 | 0.29108 |
| 229.31143 | 3.61486 | 0.29064 |
| 229.48    | 3.6171  | 0.29021 |
| 229.64857 | 3.61934 | 0.28978 |
| 229.81714 | 3.62158 | 0.28935 |
| 229.98572 | 3.6238  | 0.28892 |
| 230.15428 | 3.62602 | 0.2885  |
| 230.32286 | 3.62824 | 0.28807 |
| 230.49142 | 3.63045 | 0.28765 |
| 230.66    | 3.63266 | 0.28722 |
| 230.82857 | 3.63486 | 0.2868  |
| 230.99715 | 3.63705 | 0.28638 |
| 231.16571 | 3.63924 | 0.28596 |
| 231.33429 | 3.64143 | 0.28554 |
| 231.50285 | 3.64361 | 0.28512 |
| 231.67143 | 3.64578 | 0.28471 |
| 231.84    | 3.64795 | 0.28429 |
| 232.00858 | 3.65012 | 0.28388 |
| 232.17714 | 3.65228 | 0.28347 |
| 232.34572 | 3.65443 | 0.28305 |
| 232.51428 | 3.65658 | 0.28264 |
| 232.68286 | 3.65873 | 0.28223 |
| 232.85143 | 3.66087 | 0.28182 |

|           |         |         |
|-----------|---------|---------|
| 233.02    | 3.663   | 0.28142 |
| 233.18857 | 3.66513 | 0.28101 |
| 233.35715 | 3.66726 | 0.28061 |
| 233.52571 | 3.66938 | 0.2802  |
| 233.69429 | 3.67149 | 0.2798  |
| 233.86285 | 3.6736  | 0.2794  |
| 234.03143 | 3.67571 | 0.279   |
| 234.2     | 3.67781 | 0.2786  |
| 234.36858 | 3.6799  | 0.2782  |
| 234.53714 | 3.68199 | 0.2778  |
| 234.70572 | 3.68408 | 0.2774  |
| 234.87428 | 3.68616 | 0.27701 |
| 235.04286 | 3.68823 | 0.27661 |
| 235.21143 | 3.6903  | 0.27622 |
| 235.38    | 3.69237 | 0.27583 |
| 235.54857 | 3.69443 | 0.27544 |
| 235.71715 | 3.69649 | 0.27505 |
| 235.88571 | 3.69854 | 0.27466 |
| 236.05429 | 3.70059 | 0.27427 |
| 236.22285 | 3.70263 | 0.27388 |
| 236.39143 | 3.70467 | 0.2735  |
| 236.56    | 3.7067  | 0.27311 |
| 236.72858 | 3.70873 | 0.27273 |
| 236.89714 | 3.71075 | 0.27234 |
| 237.06572 | 3.71277 | 0.27196 |
| 237.23428 | 3.71479 | 0.27158 |
| 237.40286 | 3.7168  | 0.2712  |
| 237.57143 | 3.7188  | 0.27082 |
| 237.74001 | 3.7208  | 0.27045 |
| 237.90857 | 3.7228  | 0.27007 |
| 238.07715 | 3.72479 | 0.26969 |
| 238.24571 | 3.72678 | 0.26932 |
| 238.41429 | 3.72876 | 0.26894 |
| 238.58286 | 3.73074 | 0.26857 |
| 238.75143 | 3.73272 | 0.2682  |
| 238.92    | 3.73468 | 0.26783 |
| 239.08858 | 3.73665 | 0.26746 |
| 239.25714 | 3.73861 | 0.26709 |
| 239.42572 | 3.74057 | 0.26672 |
| 239.59428 | 3.74252 | 0.26635 |
| 239.76286 | 3.74446 | 0.26599 |
| 239.93143 | 3.74641 | 0.26562 |
| 240.10001 | 3.74835 | 0.26526 |
| 240.26857 | 3.75028 | 0.26489 |
| 240.43715 | 3.75221 | 0.26453 |
| 240.60571 | 3.75413 | 0.26417 |
| 240.77429 | 3.75605 | 0.26381 |
| 240.94286 | 3.75797 | 0.26345 |
| 241.11143 | 3.75988 | 0.26309 |
| 241.28    | 3.76179 | 0.26273 |
| 241.44858 | 3.7637  | 0.26238 |
| 241.61714 | 3.76559 | 0.26202 |
| 241.78572 | 3.76749 | 0.26166 |

|           |         |         |
|-----------|---------|---------|
| 241.95428 | 3.76938 | 0.26131 |
| 242.12286 | 3.77127 | 0.26096 |
| 242.29143 | 3.77315 | 0.26061 |
| 242.46001 | 3.77503 | 0.26025 |
| 242.62857 | 3.7769  | 0.2599  |
| 242.79715 | 3.77877 | 0.25955 |
| 242.96571 | 3.78064 | 0.25921 |
| 243.13429 | 3.7825  | 0.25886 |
| 243.30286 | 3.78436 | 0.25851 |
| 243.47144 | 3.78621 | 0.25816 |
| 243.64    | 3.78806 | 0.25782 |
| 243.80858 | 3.7899  | 0.25748 |
| 243.97714 | 3.79175 | 0.25713 |
| 244.14572 | 3.79358 | 0.25679 |
| 244.31429 | 3.79542 | 0.25645 |
| 244.48286 | 3.79725 | 0.25611 |
| 244.65143 | 3.79907 | 0.25577 |
| 244.82001 | 3.80089 | 0.25543 |
| 244.98857 | 3.80271 | 0.25509 |
| 245.15715 | 3.80452 | 0.25475 |
| 245.32571 | 3.80633 | 0.25442 |
| 245.49429 | 3.80813 | 0.25408 |
| 245.66286 | 3.80993 | 0.25375 |
| 245.83144 | 3.81173 | 0.25341 |
| 246       | 3.81352 | 0.25308 |
| 246.16856 | 3.81531 | 0.25275 |
| 246.33714 | 3.8171  | 0.25241 |
| 246.50571 | 3.81888 | 0.25208 |
| 246.67429 | 3.82066 | 0.25175 |
| 246.84285 | 3.82243 | 0.25142 |
| 247.01143 | 3.8242  | 0.2511  |
| 247.17999 | 3.82597 | 0.25077 |
| 247.34857 | 3.82773 | 0.25044 |
| 247.51714 | 3.82949 | 0.25012 |
| 247.68571 | 3.83124 | 0.24979 |
| 247.85428 | 3.83299 | 0.24947 |
| 248.02286 | 3.83474 | 0.24914 |
| 248.19142 | 3.83648 | 0.24882 |
| 248.36    | 3.83822 | 0.2485  |
| 248.52856 | 3.83995 | 0.24818 |
| 248.69714 | 3.84169 | 0.24786 |
| 248.86571 | 3.84341 | 0.24754 |
| 249.03429 | 3.84514 | 0.24722 |
| 249.20285 | 3.84686 | 0.2469  |
| 249.37143 | 3.84857 | 0.24659 |
| 249.53999 | 3.85029 | 0.24627 |
| 249.70857 | 3.852   | 0.24595 |
| 249.87714 | 3.8537  | 0.24564 |
| 250.04572 | 3.8554  | 0.24533 |
| 250.21428 | 3.8571  | 0.24501 |
| 250.38286 | 3.8588  | 0.2447  |
| 250.55142 | 3.86049 | 0.24439 |
| 250.72    | 3.86217 | 0.24408 |

|           |         |         |
|-----------|---------|---------|
| 250.88857 | 3.86386 | 0.24377 |
| 251.05714 | 3.86554 | 0.24346 |
| 251.22571 | 3.86721 | 0.24315 |
| 251.39429 | 3.86889 | 0.24284 |
| 251.56285 | 3.87056 | 0.24254 |
| 251.73143 | 3.87222 | 0.24223 |
| 251.89999 | 3.87388 | 0.24192 |
| 252.06857 | 3.87554 | 0.24162 |
| 252.23714 | 3.8772  | 0.24131 |
| 252.40572 | 3.87885 | 0.24101 |
| 252.57428 | 3.8805  | 0.24071 |
| 252.74286 | 3.88214 | 0.24041 |
| 252.91142 | 3.88378 | 0.2401  |
| 253.08    | 3.88542 | 0.2398  |
| 253.24857 | 3.88705 | 0.2395  |
| 253.41714 | 3.88868 | 0.23921 |
| 253.58571 | 3.89031 | 0.23891 |
| 253.75429 | 3.89194 | 0.23861 |
| 253.92285 | 3.89356 | 0.23831 |
| 254.09143 | 3.89517 | 0.23802 |
| 254.25999 | 3.89679 | 0.23772 |
| 254.42857 | 3.8984  | 0.23743 |
| 254.59714 | 3.9     | 0.23713 |
| 254.76572 | 3.90161 | 0.23684 |
| 254.93428 | 3.90321 | 0.23655 |
| 255.10286 | 3.9048  | 0.23625 |
| 255.27142 | 3.90639 | 0.23596 |
| 255.44    | 3.90798 | 0.23567 |
| 255.60857 | 3.90957 | 0.23538 |
| 255.77715 | 3.91115 | 0.23509 |
| 255.94571 | 3.91273 | 0.2348  |
| 256.11429 | 3.91431 | 0.23452 |
| 256.28287 | 3.91588 | 0.23423 |
| 256.45142 | 3.91745 | 0.23394 |
| 256.62    | 3.91902 | 0.23366 |
| 256.78857 | 3.92058 | 0.23337 |
| 256.95715 | 3.92214 | 0.23309 |
| 257.1257  | 3.9237  | 0.2328  |
| 257.29428 | 3.92525 | 0.23252 |
| 257.46286 | 3.9268  | 0.23224 |
| 257.63144 | 3.92835 | 0.23196 |
| 257.79999 | 3.92989 | 0.23168 |
| 257.96857 | 3.93144 | 0.23139 |
| 258.13715 | 3.93297 | 0.23111 |
| 258.30573 | 3.93451 | 0.23084 |
| 258.47427 | 3.93604 | 0.23056 |
| 258.64285 | 3.93756 | 0.23028 |
| 258.81143 | 3.93909 | 0.23    |
| 258.98001 | 3.94061 | 0.22973 |
| 259.14856 | 3.94213 | 0.22945 |
| 259.31714 | 3.94365 | 0.22917 |
| 259.48572 | 3.94516 | 0.2289  |
| 259.6543  | 3.94667 | 0.22862 |

|           |         |         |
|-----------|---------|---------|
| 259.82285 | 3.94817 | 0.22835 |
| 259.99142 | 3.94967 | 0.22808 |
| 260.16    | 3.95117 | 0.22781 |
| 260.32858 | 3.95267 | 0.22754 |
| 260.49713 | 3.95416 | 0.22726 |
| 260.66571 | 3.95565 | 0.22699 |
| 260.83429 | 3.95714 | 0.22672 |
| 261.00287 | 3.95863 | 0.22646 |
| 261.17142 | 3.96011 | 0.22619 |
| 261.34    | 3.96159 | 0.22592 |
| 261.50858 | 3.96306 | 0.22565 |
| 261.67715 | 3.96453 | 0.22539 |
| 261.8457  | 3.966   | 0.22512 |
| 262.01428 | 3.96747 | 0.22485 |
| 262.18286 | 3.96893 | 0.22459 |
| 262.35144 | 3.97039 | 0.22432 |
| 262.51999 | 3.97185 | 0.22406 |
| 262.68857 | 3.9733  | 0.2238  |
| 262.85715 | 3.97476 | 0.22354 |
| 263.02573 | 3.97621 | 0.22327 |
| 263.19427 | 3.97765 | 0.22301 |
| 263.36285 | 3.97909 | 0.22275 |
| 263.53143 | 3.98053 | 0.22249 |
| 263.70001 | 3.98197 | 0.22223 |
| 263.86856 | 3.9834  | 0.22197 |
| 264.03714 | 3.98483 | 0.22172 |
| 264.20572 | 3.98626 | 0.22146 |
| 264.3743  | 3.98769 | 0.2212  |
| 264.54285 | 3.98911 | 0.22094 |
| 264.71143 | 3.99053 | 0.22069 |
| 264.88    | 3.99194 | 0.22043 |
| 265.04858 | 3.99336 | 0.22018 |
| 265.21713 | 3.99477 | 0.21992 |
| 265.38571 | 3.99618 | 0.21967 |
| 265.55429 | 3.99758 | 0.21942 |
| 265.72287 | 3.99899 | 0.21917 |
| 265.89142 | 4.00038 | 0.21891 |
| 266.06    | 4.00178 | 0.21866 |
| 266.22858 | 4.00318 | 0.21841 |
| 266.39716 | 4.00457 | 0.21816 |
| 266.5657  | 4.00595 | 0.21791 |
| 266.73428 | 4.00734 | 0.21766 |
| 266.90286 | 4.00872 | 0.21741 |
| 267.07144 | 4.0101  | 0.21717 |
| 267.23999 | 4.01148 | 0.21692 |
| 267.40857 | 4.01286 | 0.21667 |
| 267.57715 | 4.01423 | 0.21643 |
| 267.74573 | 4.01559 | 0.21618 |
| 267.91428 | 4.01696 | 0.21593 |
| 268.08286 | 4.01832 | 0.21569 |
| 268.25143 | 4.01969 | 0.21544 |
| 268.42001 | 4.02104 | 0.2152  |
| 268.58856 | 4.0224  | 0.21496 |

|           |         |         |
|-----------|---------|---------|
| 268.75714 | 4.02375 | 0.21472 |
| 268.92572 | 4.0251  | 0.21447 |
| 269.0943  | 4.02645 | 0.21423 |
| 269.26285 | 4.02779 | 0.21399 |
| 269.43143 | 4.02914 | 0.21375 |
| 269.60001 | 4.03048 | 0.21351 |
| 269.76859 | 4.03181 | 0.21327 |
| 269.93713 | 4.03314 | 0.21303 |
| 270.10571 | 4.03448 | 0.21279 |
| 270.27429 | 4.03581 | 0.21256 |
| 270.44287 | 4.03713 | 0.21232 |
| 270.61142 | 4.03846 | 0.21208 |
| 270.78    | 4.03978 | 0.21185 |
| 270.94858 | 4.0411  | 0.21161 |
| 271.11716 | 4.04241 | 0.21137 |
| 271.28571 | 4.04373 | 0.21114 |
| 271.45428 | 4.04504 | 0.21091 |
| 271.62286 | 4.04634 | 0.21067 |
| 271.79144 | 4.04765 | 0.21044 |
| 271.95999 | 4.04895 | 0.21021 |
| 272.12857 | 4.05025 | 0.20997 |
| 272.29715 | 4.05155 | 0.20974 |
| 272.46573 | 4.05285 | 0.20951 |
| 272.63428 | 4.05414 | 0.20928 |
| 272.80286 | 4.05543 | 0.20905 |
| 272.97144 | 4.05672 | 0.20882 |
| 273.14001 | 4.058   | 0.20859 |
| 273.30856 | 4.05929 | 0.20836 |
| 273.47714 | 4.06056 | 0.20813 |
| 273.64572 | 4.06184 | 0.20791 |
| 273.8143  | 4.06312 | 0.20768 |
| 273.98285 | 4.06439 | 0.20745 |
| 274.15143 | 4.06566 | 0.20723 |
| 274.32001 | 4.06693 | 0.207   |
| 274.48859 | 4.06819 | 0.20677 |
| 274.65714 | 4.06946 | 0.20655 |
| 274.82571 | 4.07072 | 0.20632 |
| 274.99429 | 4.07198 | 0.2061  |
| 275.16287 | 4.07323 | 0.20588 |
| 275.33142 | 4.07448 | 0.20565 |
| 275.5     | 4.07574 | 0.20543 |
| 275.66858 | 4.07699 | 0.20521 |
| 275.83713 | 4.07823 | 0.20499 |
| 276.00571 | 4.07947 | 0.20477 |
| 276.17429 | 4.08072 | 0.20455 |
| 276.34286 | 4.08195 | 0.20433 |
| 276.51141 | 4.08319 | 0.20411 |
| 276.67999 | 4.08442 | 0.20389 |
| 276.84857 | 4.08566 | 0.20367 |
| 277.01715 | 4.08689 | 0.20345 |
| 277.1857  | 4.08811 | 0.20323 |
| 277.35428 | 4.08934 | 0.20302 |
| 277.52286 | 4.09056 | 0.2028  |

|           |         |         |
|-----------|---------|---------|
| 277.69144 | 4.09178 | 0.20258 |
| 277.85999 | 4.093   | 0.20237 |
| 278.02856 | 4.09421 | 0.20215 |
| 278.19714 | 4.09543 | 0.20194 |
| 278.36572 | 4.09664 | 0.20172 |
| 278.53427 | 4.09785 | 0.20151 |
| 278.70285 | 4.09905 | 0.20129 |
| 278.87143 | 4.10026 | 0.20108 |
| 279.04001 | 4.10146 | 0.20087 |
| 279.20856 | 4.10266 | 0.20065 |
| 279.37714 | 4.10385 | 0.20044 |
| 279.54572 | 4.10505 | 0.20023 |
| 279.71429 | 4.10624 | 0.20002 |
| 279.88284 | 4.10743 | 0.19981 |
| 280.05142 | 4.10862 | 0.1996  |
| 280.22    | 4.1098  | 0.19939 |
| 280.38858 | 4.11099 | 0.19918 |
| 280.55713 | 4.11217 | 0.19897 |
| 280.72571 | 4.11335 | 0.19876 |
| 280.89429 | 4.11452 | 0.19855 |
| 281.06287 | 4.1157  | 0.19835 |
| 281.23141 | 4.11687 | 0.19814 |
| 281.39999 | 4.11804 | 0.19793 |
| 281.56857 | 4.11921 | 0.19773 |
| 281.73715 | 4.12037 | 0.19752 |
| 281.9057  | 4.12154 | 0.19731 |
| 282.07428 | 4.1227  | 0.19711 |
| 282.24286 | 4.12386 | 0.1969  |
| 282.41144 | 4.12501 | 0.1967  |
| 282.57999 | 4.12617 | 0.1965  |
| 282.74857 | 4.12732 | 0.19629 |
| 282.91714 | 4.12847 | 0.19609 |
| 283.08572 | 4.12962 | 0.19589 |
| 283.25427 | 4.13077 | 0.19569 |
| 283.42285 | 4.13191 | 0.19548 |
| 283.59143 | 4.13305 | 0.19528 |
| 283.76001 | 4.13419 | 0.19508 |
| 283.92856 | 4.13533 | 0.19488 |
| 284.09714 | 4.13647 | 0.19468 |
| 284.26572 | 4.1376  | 0.19448 |
| 284.4343  | 4.13873 | 0.19428 |
| 284.60284 | 4.13986 | 0.19408 |
| 284.77142 | 4.14099 | 0.19388 |
| 284.94    | 4.14211 | 0.19369 |
| 285.10858 | 4.14323 | 0.19349 |
| 285.27713 | 4.14435 | 0.19329 |
| 285.44571 | 4.14547 | 0.19309 |
| 285.61429 | 4.14659 | 0.1929  |
| 285.78287 | 4.1477  | 0.1927  |
| 285.95142 | 4.14882 | 0.19251 |
| 286.12    | 4.14993 | 0.19231 |
| 286.28857 | 4.15104 | 0.19211 |
| 286.45715 | 4.15214 | 0.19192 |

|           |         |         |
|-----------|---------|---------|
| 286.6257  | 4.15325 | 0.19173 |
| 286.79428 | 4.15435 | 0.19153 |
| 286.96286 | 4.15545 | 0.19134 |
| 287.13144 | 4.15655 | 0.19115 |
| 287.29999 | 4.15764 | 0.19095 |
| 287.46857 | 4.15874 | 0.19076 |
| 287.63715 | 4.15983 | 0.19057 |
| 287.80573 | 4.16092 | 0.19038 |
| 287.97427 | 4.16201 | 0.19019 |
| 288.14285 | 4.16309 | 0.19    |
| 288.31143 | 4.16418 | 0.18981 |
| 288.48001 | 4.16526 | 0.18962 |
| 288.64856 | 4.16634 | 0.18943 |
| 288.81714 | 4.16742 | 0.18924 |
| 288.98572 | 4.16849 | 0.18905 |
| 289.1543  | 4.16957 | 0.18886 |
| 289.32285 | 4.17064 | 0.18867 |
| 289.49142 | 4.17171 | 0.18848 |
| 289.66    | 4.17278 | 0.1883  |
| 289.82858 | 4.17385 | 0.18811 |
| 289.99713 | 4.17491 | 0.18792 |
| 290.16571 | 4.17597 | 0.18774 |
| 290.33429 | 4.17703 | 0.18755 |
| 290.50287 | 4.17809 | 0.18736 |
| 290.67142 | 4.17915 | 0.18718 |
| 290.84    | 4.1802  | 0.18699 |
| 291.00858 | 4.18126 | 0.18681 |
| 291.17715 | 4.18231 | 0.18663 |
| 291.3457  | 4.18336 | 0.18644 |
| 291.51428 | 4.1844  | 0.18626 |
| 291.68286 | 4.18545 | 0.18608 |
| 291.85144 | 4.18649 | 0.18589 |
| 292.01999 | 4.18753 | 0.18571 |
| 292.18857 | 4.18857 | 0.18553 |
| 292.35715 | 4.18961 | 0.18535 |
| 292.52573 | 4.19065 | 0.18517 |
| 292.69427 | 4.19168 | 0.18499 |
| 292.86285 | 4.19271 | 0.18481 |
| 293.03143 | 4.19374 | 0.18463 |
| 293.20001 | 4.19477 | 0.18445 |
| 293.36856 | 4.1958  | 0.18427 |
| 293.53714 | 4.19682 | 0.18409 |
| 293.70572 | 4.19785 | 0.18391 |
| 293.8743  | 4.19887 | 0.18373 |
| 294.04285 | 4.19989 | 0.18355 |
| 294.21143 | 4.2009  | 0.18337 |
| 294.38    | 4.20192 | 0.1832  |
| 294.54858 | 4.20293 | 0.18302 |
| 294.71713 | 4.20395 | 0.18284 |
| 294.88571 | 4.20496 | 0.18267 |
| 295.05429 | 4.20596 | 0.18249 |
| 295.22287 | 4.20697 | 0.18231 |
| 295.39142 | 4.20797 | 0.18214 |



|           |         |         |
|-----------|---------|---------|
| 295.56    | 4.20898 | 0.18196 |
| 295.72858 | 4.20998 | 0.18179 |
| 295.89716 | 4.21098 | 0.18161 |
| 296.0657  | 4.21198 | 0.18144 |
| 296.23428 | 4.21297 | 0.18127 |
| 296.40286 | 4.21397 | 0.18109 |
| 296.57144 | 4.21496 | 0.18092 |
| 296.73999 | 4.21595 | 0.18075 |
| 296.90857 | 4.21694 | 0.18058 |
| 297.07715 | 4.21792 | 0.1804  |
| 297.24573 | 4.21891 | 0.18023 |
| 297.41428 | 4.21989 | 0.18006 |
| 297.58286 | 4.22088 | 0.17989 |
| 297.75143 | 4.22185 | 0.17972 |
| 297.92001 | 4.22283 | 0.17955 |
| 298.08856 | 4.22381 | 0.17938 |
| 298.25714 | 4.22479 | 0.17921 |
| 298.42572 | 4.22576 | 0.17904 |
| 298.5943  | 4.22673 | 0.17887 |
| 298.76285 | 4.2277  | 0.1787  |
| 298.93143 | 4.22867 | 0.17853 |
| 299.10001 | 4.22963 | 0.17836 |
| 299.26859 | 4.2306  | 0.1782  |
| 299.43713 | 4.23156 | 0.17803 |
| 299.60571 | 4.23252 | 0.17786 |
| 299.77429 | 4.23348 | 0.17769 |
| 299.94287 | 4.23444 | 0.17753 |
